# Supplementary material for: Experienced stigma and applied coping strategies during the COVID-19 pandemic in Germany: a mixed-methods study
Source: PubMed Central journal article supplement — BMJ Open. 2022 Aug 24;12(8):e059472. doi: 10.1136/bmjopen-2021-059472 (PMC9412038; doi:10.1136/bmjopen-2021-059472), 2022-08-24
Supplement: bmjopen-2021-059472.draft_revisions.pdf [file bmjopen-2021-059472.draft_revisions.pdf]

# BMJ Open

BMJ Open is committed to open peer review. As part of this commitment we make the peer review history of every article we publish publicly available.

When an article is published we post the peer reviewers' comments and the authors' responses online. We also post the versions of the paper that were used during peer review. These are the versions that the peer review comments apply to.

The versions of the paper that follow are the versions that were submitted during the peer review process. They are not the versions of record or the final published versions. They should not be cited or distributed as the published version of this manuscript.

BMJ Open is an open access journal and the full, final, typeset and author-corrected version of record of the manuscript is available on our site with no access controls, subscription charges or pay-per-view fees (<http://bmjopen.bmj.com>).

If you have any questions on BMJ Open's open peer review process please email [info.bmjopen@bmj.com](mailto:info.bmjopen@bmj.com)

# BMJ Open

## Experienced stigma and applied coping strategies during the COVID-19 pandemic in a high-income country - A mixed-methods study

|                               |                                                                                                                                                                                                                                                                                                                                                                  |
|-------------------------------|------------------------------------------------------------------------------------------------------------------------------------------------------------------------------------------------------------------------------------------------------------------------------------------------------------------------------------------------------------------|
| Journal:                      | <i>BMJ Open</i>                                                                                                                                                                                                                                                                                                                                                  |
| Manuscript ID                 | bmjopen-2021-059472                                                                                                                                                                                                                                                                                                                                              |
| Article Type:                 | Original research                                                                                                                                                                                                                                                                                                                                                |
| Date Submitted by the Author: | 26-Nov-2021                                                                                                                                                                                                                                                                                                                                                      |
| Complete List of Authors:     | Peters, Lynn; University Hospital Ulm, Internal Medicine III, Devision of Infectious Diseases<br>Burkert, Sanne; University Hospital Ulm, Internal Medicine III, Devision of Infectious Diseases<br>Brenner, Cecilia; Regional Office of Communicable Diseases<br>Grüner, Beate; University Hospital Ulm, Internal Medicine III, Devision of Infectious Diseases |
| Keywords:                     | COVID-19, MENTAL HEALTH, SOCIAL MEDICINE                                                                                                                                                                                                                                                                                                                         |
|                               |                                                                                                                                                                                                                                                                                                                                                                  |

SCHOLARONE™  
Manuscripts

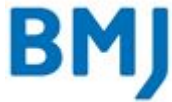

I, the Submitting Author has the right to grant and does grant on behalf of all authors of the Work (as defined in the below author licence), an exclusive licence and/or a non-exclusive licence for contributions from authors who are: i) UK Crown employees; ii) where BMJ has agreed a CC-BY licence shall apply, and/or iii) in accordance with the terms applicable for US Federal Government officers or employees acting as part of their official duties; on a worldwide, perpetual, irrevocable, royalty-free basis to BMJ Publishing Group Ltd ("BMJ") its licensees and where the relevant Journal is co-owned by BMJ to the co-owners of the Journal, to publish the Work in this journal and any other BMJ products and to exploit all rights, as set out in our [licence](#).

The Submitting Author accepts and understands that any supply made under these terms is made by BMJ to the Submitting Author unless you are acting as an employee on behalf of your employer or a postgraduate student of an affiliated institution which is paying any applicable article publishing charge ("APC") for Open Access articles. Where the Submitting Author wishes to make the Work available on an Open Access basis (and intends to pay the relevant APC), the terms of reuse of such Open Access shall be governed by a Creative Commons licence – details of these licences and which [Creative Commons](#) licence will apply to this Work are set out in our licence referred to above.

Other than as permitted in any relevant BMJ Author's Self Archiving Policies, I confirm this Work has not been accepted for publication elsewhere, is not being considered for publication elsewhere and does not duplicate material already published. I confirm all authors consent to publication of this Work and authorise the granting of this licence.

1  
2  
3  
4  
5 Experienced stigma and applied coping strategies during the  
6  
7 COVID-19 pandemic in a high-income country  
8

9  
10 - A mixed methods study -  
11

12  
13  
14 **Lynn Peters<sup>1\*</sup>, Sanne Burkert<sup>1</sup>, Cecilia Brenner<sup>2</sup>, Beate Grüner<sup>1</sup>**  
15

- 16  
17  
18 1) University Hospital of Ulm, Department of Internal Medicine III, Division of Infectious  
19 Diseases, Ulm, Germany  
20 2) Regional Office of Communicable Diseases, Uppsala, Uppsala Region, Sweden  
21  
22

23  
24  
25 \* Corresponding author  
26

27 E-Mail: [lynn.peters@uniklinik-ulm.de](mailto:lynn.peters@uniklinik-ulm.de)  
28  
29  
30  
31  
32  
33  
34  
35  
36  
37  
38  
39  
40  
41  
42  
43  
44  
45  
46  
47  
48  
49  
50  
51  
52  
53  
54  
55  
56  
57  
58  
59  
60

## Abstract

**Introduction** Health-related stigma is considered a social determinant of health equity and a hidden burden of disease. Regarding COVID-19, reports about patients experiencing stigma accumulate, yet studies examining the phenomenon are scarce.

**Methods** We conducted a mixed-methods study with sequential explanatory design in Ulm, Germany among COVID-19 survivors. Levels and dimensions of stigma were assessed by the Social Impact Scale (SIS) in 61 participants. Interviews with 14 participants were conducted to gain a deeper understanding of the experienced stigma and applied coping strategies. The questionnaire was analysed using descriptive statistics, *t*-test and ANOVA. Content analysis was used for qualitative data.

**Results** The SIS total score indicated an intermediate level of experienced stigma. Participants experienced stigma mainly as 'internalized shame' and 'social rejection', followed by 'social isolation'. 'Financial insecurity' played a minor role. There was no significant difference in experienced stigma regarding gender, education, occupational status, or residual symptoms. However, participants between 30 and 39 experienced higher levels of stigma than other age groups. Qualitative analysis informed a framework which stratified experienced stigma and applied coping strategies by societal layer: COVID-19-related stigma affected not only the individual, but also interpersonal and communal relations, access to institutions and social norms and values.

**Conclusion** The lived experience of COVID-19-related stigma is similar in different settings and was intertwined with or aggravated by socioeconomic factors. Stigma arises from misconceptions and ignorance which lead to stereotyping and discrimination. Providing accurate information and exposing misinformation on disease prevention and treatment is hence key to end COVID-19 related stigma.

## Summary box:

### "What is already known about this subject?"

Health-related stigma is considered a social determinant of health equity and a hidden burden of disease. Regarding COVID-19, reports about patients experiencing stigma accumulate. So far, the few studies investigating this phenomenon were conducted in low- and middle-income countries. They indicate that stigma leads to a significant impairment of well-being in those affected, impaired access to healthcare services and hence underreporting of infections, which implies a risk for public health.

### "What are the new findings?"

This study proves that COVID-19-related stigma is present in high-income countries as well and describes how socio-economic factors can enhance or mitigate stigma. We developed a comprehensive framework demonstrating how COVID-19-related stigma cuts through all societal levels: it affects the individual, interpersonal relations, life in the community, access to institutions and social norms and values. In our in-depth analysis, we do not only focus on experienced stigma as the problem, but also on applied coping strategies as possible solutions.

### "How might it impact on clinical practice in the foreseeable future?"

To date, stigma as a social consequence of COVID-19 has been widely neglected and poorly addressed. With this research, we would like to give affected people a voice and sensitize clinicians, health officials and political stakeholder to the phenomenon. With joint efforts, we can provide accurate information and expose misinformation on disease prevention and treatment and ultimately end COVID-19 related stigma.

## Strengths and limitations of this study

### *Strengths*

- Mixed-methods approach to gain an in-depth understanding of COVID-19 related stigma and applied coping strategies
- Development of a comprehensive framework which might serve as a template for future research in health-related stigma
- Detailed list of quotes for every theme to increase objectivity and traceability

### *Limitations*

- Telephone interviews instead of face-to-face interviews because of contact regulations
- Single-centre study design

## Objective

*'As we combat this pandemic, we have a duty to protect people, end stigma and prevent violence.'* - António Guterres (United Nations Secretary-General), on the 8<sup>th</sup> of May 2020 [1].

Health-related stigma is a social phenomenon, which implies a negative attitude towards people with a certain condition [2,3]. Stigma is often conceptualized as being perceived, enacted, internalized or structural [4]. This refers to the way an individual presumes other people's attitude towards him- or herself (perceived stigma), discriminatory behaviours (enacted stigma), a shift to a devalued self-perception (internalized stigma) and inequities embedded in policies, institutions, and social organizations (structural stigma). Regarding health, stigma is often called a hidden burden of disease [5] and described as a social determinant of health and health inequity [6]. It generates psychological stress and causes affected people to hide their condition with severe consequences for their own health, and in case of infectious diseases, for public health [7]. In the context of the COVID-19 (corona virus disease 2019) pandemic, the risk of stigmatization has been addressed early [8–10] and reports of discrimination against patients and survivors have accumulated [11]. Across the globe, people infected with or recovered from SARS-CoV-2 (Severe Acute Respiratory Syndrome Coronavirus-2) became a target of ostracism, humiliation, harassment and even violence [12–14]. As a result, people suffering from typical symptoms may refrain from seeking out testing centres or treatment to avoid respective social consequences, leading to poor health outcomes and the further spread of the virus. So far, most studies were conducted in low- and middle-income countries and little is known about the phenomenon in high-income countries. The objective of this research is to assess the level and dimensions of stigma in COVID-19 survivors during the early pandemic in a high-income country and to offer an in-depth account of stigma patterns as well as applied coping mechanisms. The results will be conceptualized in a framework and compared to those from other settings and implementations for policymakers will be discussed.

## Methods

We conducted a mixed-method study with a sequential explanatory design in the area of Ulm, Germany. The study population consisted of adult COVID-19 survivors (3-9 months *post infectionem*) who contracted SARS-CoV-2 during the first wave in 2020 and suffered from mild, moderate or severe COVID-19. The study was approved by the ethical board of the University of Ulm (No. 315/20).

### Quantitative methods

#### *Sampling, materials, data collection and potential bias*

Experienced stigma was assessed using the German version of the 24-item 'Social Impact Scale' questionnaire, originally designed by Fife & Wright (2000) [15] for patients living with HIV/AIDS or cancer [16], with 8 additional COVID-19-related questions (c.f. S1). On a 4-point Likert scale, participants rate the given statements from 'I strongly agree' to 'I strongly disagree'. The questionnaire covers different dimensions of stigma, namely 'social rejection', 'internalized shame', 'social isolation' and 'financial insecurity'. A form assessing residual symptoms was added. Both were sent to 150 COVID-19 survivors. The study sample included every adult person with positive SARS-CoV-2 nasopharyngeal swab at the university testing centre by the start of the study. Since stigma is a sensitive topic, it is easily subjected to a social-desirability bias and hence bearing the risk of the respondents' inclination towards euphemized answers. To reduce this bias, absolute anonymity was ensured: Participants received the consent form and the questionnaires with a labelled and a blank envelope. The anonymously filled-in questionnaire was inserted into the blank envelope and sealed, which was placed into the labelled envelope with the signed consent form. Upon reception, the consent form was separated from the questionnaires, hence results could not be assigned to the respective respondent.

#### *Statistical analysis*

Descriptive analyses included demographic information, post-COVID-19 symptoms, the overall level of stigma and its dimensions. Results are reported in means (M) and standard deviation (SD). Univariate analyses were performed assessing differences in experienced stigma regarding gender, age groups, occupational status and number of residual symptoms using *t*-Test, ANOVA and correlation where appropriate. Missing data was handled by listwise exclusion. A significance level of  $p < 0.05$  was considered significant.

### Qualitative methods

#### *Sampling and data collection*

From those participants consenting to an in-depth interview, we purposefully sampled a broad range with high and low perceived stigma based on the questionnaire, different severity of disease, gender, and age group to gain diverse accounts of the phenomenon. Data analysis began after 5 interviews and data saturation was reached after the 11<sup>th</sup>. Three additional interviews were conducted to ensure no new themes emerged, resulting in a total number of 14 interviews. The interviews were held in German, being the native language of the participants and followed an interview guide (c.f. S2). However, the interview was not limited to the questions at hand, the interviewer (LP) aimed for an open discussion, allowing the interviewee to determine which topics to focus on. Due to contact regulations, the interviews were conducted by telephone and recorded.

#### *Analysis and quality control*

After transcription into German, the analysis was conducted in English. LP used content analysis to develop a preliminary coding scheme from emerging codes and themes (inductive approach). To



1  
2  
3 ensure reliability, the coding scheme was subsequently applied to the interviews by SB and BG  
4 (deductive approach). Deviant codes were discussed within the research team and adjusted (peer-  
5 check), resulting in a refined coding scheme, which eventually informed a conceptual framework. To  
6 increase transparency, additional tables with key quotes for each code are attached (c.f. S3 and S4).  
7 Using mixed methods allows for methodological triangulation, i.e. assessing the phenomenon from  
8 different perspectives. Considerations regarding reflexivity and limitations are addressed in S5.  
9

### 10 11 *Patient and public involvement*

12 The initial idea informing this research was based on patients' narratives from our post-COVID-19  
13 outpatient department. During follow-up visits, patients moved from physical complaints to social  
14 consequences they experienced after having COVID-19, which often involved stigma. We developed  
15 the questionnaire used in the qualitative part based on those narratives. As mentioned earlier, the  
16 interview was designed as an open discussion allowing the participants to prioritise topics and report  
17 their experiences freely. However, patients were not involved in designing or recruiting. We aim to  
18 offer a lay summary in German on our website to inform participants about the results.  
19  
20  
21  
22  
23  
24  
25  
26  
27  
28  
29  
30  
31  
32  
33  
34  
35  
36  
37  
38  
39  
40  
41  
42  
43  
44  
45  
46  
47  
48  
49  
50  
51  
52  
53  
54  
55  
56  
57  
58  
59  
60

## Results

### Quantitative results

In total, 61 questionnaires were analysed, 58% of respondents were male and the median age was 51 years (minimum = 18, maximum = 78). Regarding occupational status, 70.3% were employed, 6.3% were students or trainees and 15.6% were unemployed or received pension. Almost all participants had informed close family members (98.4%) and friends (95.3%) about their infection with SARS-CoV-2, fewer confided in acquaintances (81.3%), more distant relatives (78.1%), close colleagues (76.6%), neighbours (73.4%), superiors (71.9%) and more distant co-workers (50.0%).

Table 1 demonstrates residuals symptoms participants suffered from. Dyspnoea on exertion was the leading symptom, followed by fatigue, palpitations, a sore throat, and cough.

The achievable score of the Social Impact Scale ranged from 31 (low level stigma) to 124 (high level of stigma). The achieved score in our cohort ranged from 31 to 97 with a mean of 48.1 (SD 13.1), and a median of 45.0 (c.f. fig 1).

| Residual Symptoms:        | N  | %     |
|---------------------------|----|-------|
| Dyspnoea on exertion      | 11 | 20.4% |
| Fatigue                   | 6  | 12.2% |
| Paraesthesia              | 5  | 10.2% |
| Cough                     | 4  | 8.2%  |
| Sore throat               | 4  | 8.2%  |
| Cephalgia                 | 4  | 8.2%  |
| Palpitations              | 4  | 8.2%  |
| Rhinorrhoea               | 3  | 6.1%  |
| Loss of smell and taste   | 3  | 6.1%  |
| Diarrhoea                 | 2  | 4.1%  |
| Myalgia                   | 2  | 4.1%  |
| Xerophthalmia             | 2  | 4.1%  |
| Sleeping disorder         | 2  | 4.1%  |
| Loss of hair              | 2  | 4.1%  |
| Lack of attention         | 2  | 4.1%  |
| Mucus                     | 1  | 2.0%  |
| Dyspnoea without exertion | 0  | 0%    |
| Fever                     | 0  | 0%    |
| Hearing loss              | 0  | 0%    |
| Loss of vision            | 0  | 0%    |

Figure 1: Social Impact Scale, overall score

The separate questions were rated on a score from 0 (low level of stigma) to 3 (high level of stigma). The question with the highest level of experienced stigma was 'I feel others are concerned they could catch my illness.' ( $M = 1.52$ ), followed by 'I feel guilty, because I accidentally might have infected others.' ( $M = 1.03$ ). 'I feel others think I am to blame for my illness.' ( $M = 1.0$ ), 'Due to my illness others seem to avoid me when they are around me.' ( $M = 0.97$ ), 'When I came back to work or met friends, I was worried how they would behave towards me.' ( $M = 0.91$ ) and 'I feel institutions and professionals (health authority, health care workers) treated me unfair.' ( $M = 0.81$ ). The lowest experienced stigma resulted from the question 'I have experienced financial hardship that has affected my relationship with others.' ( $M = 0.08$ ), followed by 'Some family members have rejected me because of my illness.' ( $M = 0.11$ ) and 'My job security has been affected by my illness.' ( $M = 0.15$ ).

Figure 2 depicts experienced level of stigma displayed by dimension with 'internalized shame' ( $M = 1.68$ ) and 'social rejection' ( $M = 1.58$ ) showing the highest level, followed by 'social isolation' ( $M = 1.45$ ). 'Financial insecurity' ( $M = 1.17$ ) played a minor role. The overall mean was 1.55 ( $SD 0.42$ ). Adapted to the original questionnaire [15], we calculated aggregate means. 'Social rejection' showed the highest mean ( $M = 14.22$ ,  $SD = 4.91$ ), followed by 'social isolation'

Figure 2: Dimensions of stigma. High numbers equal high level of experienced stigma

( $M = 10.17$ ,  $SD = 4.16$ ) and 'internalized shame' ( $M = 8.39$ ,  $SD = 3.32$ ) and, ultimately, financial insecurity ( $M = 3.51$ ,  $SD = 1.38$ ). The data were evenly distributed. There was no difference in experienced stigma comparing gender ( $t(59) = 0.437$ ,  $p = 0.664$ ), educational level ( $F(4) = 0.687$ ,  $p =$

0.604), occupational status ( $F(3) = 0.995, p = 0.404$ ) or residual symptoms (composite score of symptoms) ( $r(46) = -0.250, p = 0.093$ ). There was a significant difference in age groups ( $F(6) = 2.499, p = 0.034$ ), with those between 30 and 39 experienced the highest levels of stigma.

## Qualitative results

During the analytical process, it became evident that COVID-19 survivors experienced stigma as a multi-layered phenomenon. Therefore, we stratified experienced stigma and applied coping strategies by societal layer, albeit knowing that these reflect a continuous spectrum rather than clearly separated domains. The respective **codes** and **themes** were integrated into a comprehensive framework (fig. 3). The following section will guide the reader through all strata from inner to outer layer and present the experienced stigma and the applied coping strategy for each. The number of times respective codes were applied throughout the interviews is indicated by (n). To keep this report concise, we limited ourselves to one exemplary quote for every code presented. However, we invite the reader to consult the supplementary materials S3 and S4, which offer several key quotes for both experienced stigma and applied coping strategies.

*Figure 3: Comprehensive framework of experienced stigma and applied coping strategies, stratified by societal layer*

### Individual layer

**Vulnerability** was identified as key theme contributing to or resulting from internalized or perceived stigma. Different codes added to increased vulnerability:

- **Fear, worries and despair** (n = 11): *'I was thinking «why me???»... and «I hope this ends well...»'* (female, y/o); Most participants were worried about the outcome of their infection, yet elderly patients and those referred to the hospital were particularly in fear of death.
- **Shame, guilt or remorse** (n = 14): *'Of course you feel bad knowing you infected others'* (female, y/o); Although infecting others happened unwittingly in all cases, participants often felt as 'spreader', indicating an active or deliberate part in the pandemic. This left them feeling ashamed or wishing for everything to be undone.
- **Loneliness and abandonment** (n = 14): *'Being on my own was the hardest part.'* (male, y/o); This feeling often rose from the isolation people faced in home-quarantine or single hospital rooms, but also from the lack of information during the beginning of the pandemic regarding possible symptoms, the course of disease and treatment options.

On the other hand, **resilience** as coping strategy mitigated the experienced stigma, resulting from:

- **Confidence** (n = 5) *'I knew I was getting medication; I was sure that would help, otherwise they wouldn't give it to me. I wasn't worried I would die.'* (male, y/o); Elderly participants putting faith in modern medicine or young participants relying on their own immune defence were confident that they would not experience adverse outcomes.
- **Self-efficacy** (n = 2) *'In the beginning it was very hard for me. But as soon as I managed to structure my day, time just flew by.'* (male, y/o); Self-efficacy reflects a person's assumed control over a situation and was identified as a rare but resourceful coping strategy.

1  
2  
3 Additionally, participants indicated different ways of **coming to terms** with the undergone infection:

- 4  
5  
6  
7  
8  
9  
10  
11  
12  
13  
14  
15  
16  
17  
18  
19  
20
- **Pragmatism** (n = 2): *'I had it [COVID-19], that's all there is. Now I am cured and immune.'* (female, y/o); some participants refused dwelling in the past and did not make a big deal about having had COVID-19. Interestingly, this occurred in one participant who suffered only mild symptoms but also in one that had been hospitalized for a few days.
  - **Delayed disclosure** (n = 3): *'In the beginning, I didn't want to share with anyone. Afterwards, we talked about it.'* (female, y/o); Participants from different age groups and with different severity of disease admitted that they needed some time to process before they were able to confide in someone else, sharing what they had been through.
  - **Rationalization** (n = 2): *'When I was there, it wasn't known to be a hotspot!'* (male, y/o); Some participants offered a rationale to justify how they got infected. They emphasized that they did not deliberately put themselves and thereby others at risk.
  - **Denial or fallacy** (n = 1): *'Maybe I didn't have it [COVID-19]. I even know couples, where one had it and the other didn't'* (male, y/o). One participant doubted the established diagnosis.

21 **Financial insecurity** concerned comparatively few participants who were self-employed. This applied to both direct and indirect costs, the latter resulting from a loss of income:

- 22  
23  
24  
25  
26  
27
- Direct costs (n = 2): *'If I hadn't had any savings, it would have been problematic'* (male, y/o)
  - Indirect costs (n = 1): *'I have to earn my money with physical labour. When I can't work, I don't earn money...'* (male, y/o)

28 However, most participants were either employed or received pension and hence costs were covered by their health insurance, implying **financial security** (n = 8):

- 29  
30  
31  
32
- *'I was on sick leave and got my loan as usual.'* (female, y/o)

### 33 *Interpersonal layer*

34  
35  
36 Used to a certain level of self-determination and a scope of action, most participants were hit hard by the **loss of autonomy**. In particular, this was reflected by a:

- 37  
38  
39  
40  
41  
42  
43  
44  
45  
46
- **Loss of independence** (n = 5): *'We were all isolated, other people had to take care of us.'* (female, y/o); Quarantine or being bed-ridden meant depending on others, which was a new situation for many participants.
  - **Violation of privacy** (n = 4): *'I live in a small village and within two hours, everyone knew about it [COVID-19]'* (female, y/o); Transgression of personal boundaries or unauthorized passing of personal information left some participants, young and elderly, feeling powerless.

47 Almost every participant suffered some form of **vilification** as perceived or enacted stigma:

- 48  
49  
50  
51  
52  
53  
54  
55  
56  
57  
58  
59  
60
- **Blame** (n = 9): *'Some people said it is my own fault that I got infected.'* (male, y/o). Some patients were made responsible for catching SARS-CoV-2 or blamed for unknowingly infecting others. This reflects a shift in perspective from passively acquiring a disease to actively spreading it. This change from victim to perpetrator was described as particularly hurtful when people had been severely ill from COVID-19.
  - **Disregard** (n = 4): *'They [acquaintances] did not really care about what had happened to me.'* (female, y/o); Lack of concern or misconceptions about what participants were going through left some participants frustrated or angry. This was reported by patients with mild symptoms as well as those hospitalized.

As mentioned earlier, loneliness and abandonment left participants feeling vulnerable. Additional **avoidance of personal contact** by others when participants were no longer contagious was hence particularly upsetting and by far the most frequently reported form of enacted stigma:

- (Irrational) fear of infection (n = 27) was presumably the most important driver for the reported behaviour of others: *'Many people withdrew from me for a long time.... I think they were still afraid of getting infected'* (female, 77 y/o).

Participants reported different ways in **dealing with the rejective behaviour** of others:

- Understanding (n = 10); Most participants could at least partly comprehend and therefore excuse this behaviour: *'I could totally understand their [friends] behaviour. No one knew exactly how long people can transmit COVID.'* (female, y/o)
- Reasoning (n = 2); others tended to argue: *'When they [friends] took a step back, I told them there was no reason, they could hug me, I am no longer contagious.'* (male y/o)
- Distancing (n = 2) oneself avoiding emotional involvement and further frustration: *'When I heard about what others said, I just distanced myself from that.'* (male, y/o)

Consequently, **personal contact** was much appreciated by all participants and proved one of the most powerful coping strategies, involving:

- Genuine interest and mindfulness (n = 7) regarding the participants well-being were key elements: *'It's very important that there are people who care about you and want to know how you are doing. My mum called every day to check on me, that felt good.'* (male, y/o)
- Unaltered interpersonal relationship (n = 4), i.e. discovering that 'nothing had changed' made participants feel relieved: *'With my friends, it is the same way as it has been before.'* (male, y/o).
- Comprehension (n = 4): *'I talked to a friend, and she could totally relate.'* (female, y/o). When sharing their stories induced sympathy and comprehension, participants felt that their emotions were acknowledged and legitimate.

### *Communal layer*

The lines between the interpersonal and community layers are particularly blurry. Thus, codes and themes emerging are often similar, yet referring to a different social group. While the interpersonal layer focuses on close personal relationships, the following section refers to more distant contacts or anonymous settings.

Similar to the interpersonal layer, **social rejection** plays an important role in enacted stigma. Again, a potential driver identified was:

- (irrational) fear of infection (n = 6): *'When I did my groceries and kept a 2 to 3 meters distance, people still told me to go further away.... they even changed the side of the street when they saw me.'* (female, y/o)

Additionally, **stereotyping** as perceived stigma was indicated, mainly in younger people, suggested by:

- Perceived recklessness or carelessness (n = 4): *'Now you [referring to the interviewer] are probably going to say «how on earth could you go skiing, and how could you go there [place where she got infected]?!?', but back then it wasn't that obvious....'* (female, y/o)
- Rumours (n = 2): *'In town, everyone acted like they knew better why I was infected'* (female, y/o)

The **reaction** to experienced stigma on the communal level included:

- Understanding (n = 3): *'I tried to understand their reaction [people at work] and asked myself, how I would have reacted in their place? And honestly, I would keep my distance too. That is probably human.'* (male, y/o)
- Reasoning (n = 2): *'I told them [people in a grocery store] I am no longer contagious and that they don't need to keep a 10-meter distance. In fact, I am less dangerous than other people.'* (female, y/o)
- Resignation (n = 3), i.e. accepting adverse behaviour without arguing: *'I didn't really bother. Couldn't change it anyway. (...) You have to take it the way it is.'* (male, y/o)

**Social network and inclusion** turned out as a valuable resource against experienced stigma:

- Sympathy (n = 7): *'So many people called during my absence to make sure I am okay, and they were so happy to hear from me when I called them back.'* (male, y/o). For many participants it was important, that others cared about them and felt for them.
- Solidarity and support (n = 7) from friends or neighbours helped many participants to persevere the isolation and let them rest assured that they would receive help if needed: *'Many people from our village offered help and asked if they could get us anything. I was surprised by their willingness to help.'* (female, y/o)

### *Institutional layer*

Institutional stigma referred to the stigma participants faced in contact with health authorities, hospital staff, general practitioners, and paramedics. Actions directed towards individual participants were labelled **direct discrimination**, a form of enacted stigma. They resulted mainly from

- Unprofessional treatment (n = 4), which means inappropriate reactions from healthcare workers: *'Since I was the second patient in that other hospital, they had a lot of «respect» of me and avoided coming close to me... that was even worse for me than the [rejecting] behaviour of other people.'* (female, y/o).

In our cohort, structural stigma did not require person-to-person contact and did usually not target individuals specifically but was often based on regulations affecting the respective group. It is hence labelled as **indirect discrimination**. Two codes were identified:

- Lack of accountability (n = 10): In many participant's views, health authorities and other institutions failed to take responsibility or lacked transparency; *'They [health authorities] gave us a number where we could call, but no one ever answered the phone.'* (female, y/o)
- Inconsistency (n = 4): Due to contradictory information, participants lost trust in health officials and felt increasingly insecure: *'They [the health authority] told me on the phone my quarantine ended on Thursday. Then I got the letter from them saying I needed to stay in quarantine for another 2 weeks'* (male, y/o)

A first, many participants' **reaction to this discriminatory behaviour** was

- Incomprehension (n = 8): *'I really felt mocked by the health authorities.'* (female, y/o).
- But eventually, in retrospect, they often reacted understandingly and forgivingly, which we labelled Leniency (n = 8): *'I guess they [the health authorities] were just overwhelmed'* (male, y/o).

Additionally, **receiving professional support** was much appreciated:

- Appreciation of health-care workers (n = 4): *'He [family doctor] called every day to make sure I was okay. That felt good.'* (female, y/o)
- Support group (n = 2): *'Is there a self-help group for COVID survivors?'* (male, y/o)



### *Societal layer*

This layer characterized **societal norms and values** which are partly internalized by participants.

- First, COVID-19 was seen as a non-desirable condition (n = 5) and something usually ‘others’ catch: *‘I was surprised. I never thought **we** would get it.’* (female, y/o).
- Secondly, even if unaware of carrying an infectious virus, participants perceived themselves as a menace to others (n = 10) and public health in general. This was the most sensitive subject during the interview: Q: *‘Do you happen to know if you accidentally infected somebody?’* A: *‘I don’t want to talk about that.’* (male, y/o)

As a reaction to the latter, people reacted in very different ways, often trying to make amendments, which we subsumed as **harm reduction**:

- Law-abiding (n=5): Participants emphasized that they stuck to the regulations and thereby avoided spreading the disease: *‘When we came back [from a hotspot] we stayed at home. So when we finally knew we had it [COVID-19], at least I didn’t feel guilty, because I knew I didn’t infect anyone else.’* (female, y/o)
- Social withdrawal (n = 3): Others reduced social contacts even after COVID-19 was over, often in order to avoid rejective behaviour: *‘When my quarantine ended, I didn’t ask people to meet. I was afraid they would react... in a strange way.’* (female, y/o)
- Hygiene advocacy (n = 3): Others supported and propagated hygiene practices as effort to control the disease: *‘I tell everyone, they should wear their face masks.’* (female, y/o)

S4 also includes participants’ opinions regarding legal stipulations. However, since this is not necessarily part of experienced stigma or applied coping strategies, it will not be further discussed here.

## Discussion

### Comparison with international literature

In total, experienced stigma was lower in our cohort compared to people living with HIV/AIDS or cancer in the United States [15] or Germany [16] (c.f. table 2). Comparing our results to people living with cancer, 'social rejection' and 'internalized shame' were similar in both groups [15] or slightly higher [16] in people with COVID-19, while people with cancer experienced higher levels of stigma in the dimensions 'social isolation' and 'financial insecurity'. The difference to Eichhorn et al. (2015) [16] was smaller, presumably due to a similar setting, than to Fife and Wright (2000) [15].

|                      | HIV/AIDS [15]<br>(aggregate means) | Cancer [15]<br>(aggregate means) | COVID-19<br>(aggregate means) | Cancer [16]<br>(means) | COVID-19<br>(means) |
|----------------------|------------------------------------|----------------------------------|-------------------------------|------------------------|---------------------|
| Social rejection     | 19.95                              | 14.87                            | 14.22                         | 1.42                   | 1.58                |
| Internalized shame   | 13.74                              | 8.45                             | 8.39                          | 1.51                   | 1.68                |
| Social isolation     | 17.85                              | 14.64                            | 10.17                         | 1.71                   | 1.45                |
| Financial insecurity | 8.12                               | 5.73                             | 3.51                          | 1.68                   | 1.17                |
| <b>Total score</b>   | <b>59.66</b>                       | <b>43.69</b>                     | <b>36.29</b>                  | <b>1.59</b>            | <b>1.55</b>         |

Table 2: Experienced stigma in people living with cancer, HIV/AIDS or after COVID-19

### Experienced stigma across societal levels

Different individual factors, such as personality, social resources, and economic situation, can either enhance or mitigate the impact of stigma. In contrast to other, mainly low-and-middle-income countries [13,17,18], in our cohort, COVID-19-related stigma did usually not culminate in financial hardship. However, some self-employed participants had to advance money on loan for the hospital costs before they were reimbursed by their health insurance. Additionally, they suffered from a loss of income while being ill, but none reported loss of livelihood or job insecurity.

A sudden illness like COVID-19, fear of adverse outcomes and loneliness generate a feeling of vulnerability, which serves as a breeding ground for experiencing stigma. Stigma in turn increases vulnerability even further, irrespective of the setting [19]. Hence, COVID-19-related stigma leads to psychological stress and impairs the individual's wellbeing [13,19,20]. Loss of autonomy, specifically the violation of privacy, was also observed as well as in other settings [13,17,21]. Participants reported that by word of mouth, the news or rumours of someone being infected travelled quickly and confidentiality was often breached, even in healthcare facilities. This poses a serious risk for people to hide their condition and refrain from test- or healthcare-seeking, favouring the further spread of the virus [18].

If exposed, vilification including blame, social rejection and stereotyping are key themes on the communal level in our as well as in other studies examining COVID-19-related stigma: Gopichandran et al. (2021) [17] noticed an exclusion from essential services such as grocery stores and water taps. Jiang et al. (2021) [11] found that 5% of respondents lived in communities that rejected people with COVID-19. Imran et al. (2020) [13] reported social rejection of whole families if one member fell ill as well as humiliating and sarcastic behaviour of others. Amir (2020) [12] described how patients were treated as outcasts, given bad names and blamed for spreading the disease. Chew et al. (2020) [22] identified isolation, labelling, stereotyping and blame as emerging themes. International literature agrees that the underlying reason for social rejection is an (irrational) fear of infection with a perceived lethal and incurable virus [12,13,18,21,23], correlating with experienced vulnerability among the healthy population [24].



1  
2  
3 Stigma experienced on institutional level included both direct and indirect discrimination. The former  
4 resulted from inappropriate treatment by professionals, such as negligence of patients or compelling  
5 them to leave the hospital. Difficulties in assessing healthcare, poor services and negligence were also  
6 found in other study sites [17,19,25]. Indirect discrimination referred to a lack of accountability when  
7 health authorities were presumably too overwhelmed to take over responsibility.

8 On a societal level, health-related stigma is often associated with certain norms and values. People  
9 living with HIV/AIDS are often perceived as 'dirty' or 'immoral' [26] and some types of cancer are linked  
10 to an unhealthy lifestyle or risk behaviour [27]. In contrast to those conditions, COVID-19 is an airborne  
11 infection with high transmissibility. One person infects about three others [28] and health authorities  
12 made a great effort to find index patients. This induced a change of perspective from passively  
13 'catching the virus'—as is commonly used in other viral diseases such as influenza or norovirus—to  
14 actively 'spreading the virus', even if this happened unwittingly. The change equals a shift from 'victim'  
15 to 'perpetrator' resulting in blame, which was also observed in other settings [18]. This attitude was  
16 internalized by many participants, who felt ashamed of (accidentally) infecting others.  
17  
18  
19

### 20 21 Applied coping strategies across societal levels

22 On an individual level, resilience served as an effective coping strategy, either reflected by confidence  
23 in others or themselves. Gopichandran *et al.* (2021) [17] described understanding of disease  
24 characteristics, risk acceptance and self-isolation as applied coping strategies, resembling what we  
25 subsumed as 'coming to terms' with the disease. Disclosing what had happened only afterwards, which  
26 is not uncommon in traumatic experiences, rationalization to justify former behaviour and, in one case,  
27 denial were other coping strategies on the individual level.

28 On the interpersonal and communal level, a strong, solidary social network and sound relationships  
29 were valuable resources to cope with stigma [17,20,29]. This might work in both directions: For those  
30 not infected, COVID-19 is not reduced to a faceless, dangerous virus, but connected to a human being  
31 [30]. This can induce a comprehensive and mindful attitude which prevents stigmatization and  
32 supports those infected. 'Humanizing' COVID-19 has been insinuated as a way to end stigma, either by  
33 involving celebrities or sharing narratives from affected people [22,24,31].

34 On the institutional level, discrimination elicited either incomprehension or leniency in participants.  
35 From the lived experiences it becomes evident, that institutions need to be transparent [23] and give  
36 consistent instructions to preserve people's confidence and compliance.

37 On a societal level, coping strategies against internalized shame were diverse and ranged from social  
38 withdrawal to a strictly law-abiding or hygiene advocating behaviour, resulting from experience and  
39 hindsight to reduce (further) harm.  
40  
41  
42  
43  
44

### 45 Intersectional stigma

46 As a social phenomenon, stigma can never be assessed detached from other social conditions, often  
47 mirroring power differences between groups. Most studies about COVID-19-related stigma suggest a  
48 higher prevalence among elderly people or patients with comorbidities, since they are most affected  
49 by the disease [19,23,31]. However, in our study, young to middle-aged participants reported the  
50 highest level of experienced stigma. This might result from the shift from 'victim' to 'perpetrator'  
51 mentioned earlier. Those participants who were seriously ill often received sympathy from their social  
52 environment and were seen as 'victims'. In contrast, young people were often asymptomatic and  
53 regarded as 'super-spreaders' [32]. They were depicted as drivers of the pandemic and hence regarded  
54 as 'perpetrators'. Reports from illegal parties despite the curfew added to a reckless and careless  
55 stereotype of young people [33]. We assume the perception of a similar stereotype caused the higher  
56 prevalence of experienced stigma in participants with travel history [34]. Those coming back from a  
57 skiing trip in a hotspot were seen as a major source of the pandemic and perceived as reckless, since  
58 they presumably valued the vacation more than their health and the health of others. Similarly, the  
59  
60

1  
2  
3 patient's **origin** was also connected with COVID-19-related stigma in other settings, e.g. regarding  
4 migrant workers in Delhi, India, residing in Haryana [11,18,23,31]. However, since all our participants  
5 had the same cultural background, we were not able to assess different ethnicities in our cohort. In  
6 contrast to other studies, we did not find any difference in **gender** [13,19,23,35] or **education** [35]  
7 regarding experienced COVID-19-related stigma. Others also clearly identified an association between  
8 **poverty** [17,18] or occupational status [35] and experienced stigma, where a mutual influence can be  
9 assumed: COVID-19 is more easily spread in over-crowded, poorer areas; on the other hand, COVID-  
10 19 can lead to a loss of livelihood of those infected. We did not collect data on the economic situation,  
11 but used the occupational status as a proxy, which revealed no significant difference between the  
12 groups. However, this variable might fail to reflect more subtle socioeconomic differences between  
13 participants. Similar to Gopichandran et al. (2021) [17], our qualitative data suggested that  
14 experienced stigma differs with **residential site**: participants in more anonymous urban apartments  
15 experienced less stigma than those living in rural areas, where residents know each other and word by  
16 mouth travels quickly. On the other hand, participants from rural areas also reported more neighbourly  
17 support.  
18  
19  
20  
21

## 22 Conclusion and implications for stakeholders

23  
24 Around the globe, stigma is a social phenomenon which cuts through all layers of society. It is  
25 intertwined with or aggravated by social factors and power distributions and leads to a phenomenon  
26 called 'othering' of the respective group, which is a precursor of discrimination. It leads to a limited  
27 access to healthcare and other public services and can therefore be seen as a social determinant of  
28 health equity and a hidden burden of disease. Stigma arises from misconceptions and ignorance.  
29 Information about COVID-19 in social media is often incorrect [36] and people have difficulties finding  
30 reliable sources [11] to distinguish between fake and fact. Providing accurate information and exposing  
31 misinformation on disease prevention and treatment is hence key to end COVID-19 related stigma.  
32 Information should be adapted to the respective target group and conveyed in plain and different  
33 languages. That way, stakeholders from politics, civil society or role models can join efforts to curb  
34 COVID-19 related stigma.  
35  
36  
37  
38  
39  
40

## 41 Reflexivity and limitations

42 Since the interviews were conducted by telephone, physical appearance and body language did not  
43 play a role, in contrast to face-to-face interviews. This can work in both directions: either participants  
44 appreciated the more anonymous atmosphere to share private information, or they would have  
45 preferred a more personal and intimate setting.

46 Talking to a medical doctor, participants are used to share physical complaints rather than social  
47 experiences such as stigma. Participants often had the impression that their narratives were  
48 inappropriate or not of interest. Therefore, continuous probing was needed, to keep participants  
49 sharing their stories. Nevertheless, an expectation bias cannot be excluded. Furthermore, a recall bias  
50 must be considered due to the retrospective character of the study.

51 Of note, those participants who volunteered to take part in the interview were mostly of German  
52 origin. The fact that the questionnaire required an advanced level of German, and the nature of the  
53 topic was rather sensitive could have limited the diversity of study participants. Future studies should  
54 aim to deliberately include participants with different cultural and socioeconomic backgrounds to  
55 achieve a more diverse account of the phenomenon. This would allow to assess the possible  
56 relationship between health-related stigma and racism.  
57  
58  
59  
60

1  
2  
3  
4  
5  
6  
7  
8  
9  
10  
11  
12  
13  
14  
15  
16  
17  
18  
19  
20  
21  
22  
23  
24  
25  
26  
27  
28  
29  
30  
31  
32  
33  
34  
35  
36  
37  
38  
39  
40  
41  
42  
43  
44  
45  
46  
47  
48  
49  
50  
51  
52  
53  
54  
55  
56  
57  
58  
59  
60

**Acknowledgments**

We thank Michael Krupka for valuable input and continuous support and Métrety Tiv for reviewing the interview guide.

For peer review only

## Statements

### a. Contributorship

- Conceptualisation: LP, BG
- Methodology: LP
- Data acquisition: LP
- Initial analysis: LP
- Interpretation of data: LP, SB, CB, BG
- Writing - original draft: LP
- Visualization: LP
- Writing - review and editing: SB, CB, BG
- Final approval: LP, SB, CB, BG
- Accountability: LP, SB, CB, BG

### b. Funding with award/grant number

There was no funding involved in this study.

### c. Competing interests

The authors declare that there is no conflict of interest.

### d. Data sharing statement

Data (both quantitative and original German qualitative data) are available on request.

## References

- [1] United Nations. "We must act now to strengthen the immunity of our societies against the virus of hate" 2020, <https://www.un.org/en/coronavirus/we-must-act-now-strengthen-immunity-our-societies-against-virus-hate> (accessed October 20, 2021)
- [2] Goffman E. *Stigma: Notes on the Management of Spoiled Identity*. New York: Simon & Schuster, Inc; 1963.
- [3] Bos AER, Pryor JB, Reeder GD, Stutterheim SE. *Stigma: Advances in Theory and Research*. *Basic Appl Soc Psych* 2013;35:1–9. <https://doi.org/10.1080/01973533.2012.746147>.
- [4] R M. Resources to address stigma related to sexuality, substance use and sexually transmitted and blood-borne infections. *Can Commun Dis Rep* 2018;44:62–7. <https://doi.org/10.14745/CCDR.V44I02A05>.
- [5] WHO. *Undefined and Hidden Burden of Mental Health Problems*. Geneva: 1999.
- [6] Hatzenbuehler ML, Phelan JC, Link BG. Stigma as a Fundamental Cause of Population Health Inequalities. *Am J Public Health* 2013;103:813. <https://doi.org/10.2105/AJPH.2012.301069>.
- [7] Stangl AL, Earnshaw VA, Logie CH, Van Brakel W, Simbayi LC, Barré I, et al. The Health Stigma and Discrimination Framework: A global, crosscutting framework to inform research, intervention development, and policy on health-related stigmas. *BMC Med* 2019;17. <https://doi.org/10.1186/s12916-019-1271-3>.
- [8] COVID-19 & stigma: How to prevent and address social stigma in your community | UNICEF Sudan n.d. <https://www.unicef.org/sudan/covid-19-stigma-how-prevent-and-address-social-stigma-your-community> (accessed September 27, 2021).
- [9] Bruns DP, Kraguljac NV, Bruns TR. COVID-19: Facts, Cultural Considerations, and Risk of Stigmatization. *J Transcult Nurs* 2020;31:326–32. <https://doi.org/10.1177/1043659620917724>.
- [10] Li W, Yang Y, Ng CH, Zhang L, Zhang Q, Cheung T, et al. Global imperative to combat stigma associated with the coronavirus disease 2019 pandemic. *Psychol Med* 2021;51:1957–8. <https://doi.org/10.1017/S0033291720001993>.
- [11] Jiang T, Lin L, Zhong Y, Wang X, Zhu H. COVID-19-related stigma and its influencing factors: a rapid nationwide study in China 2020. <https://doi.org/10.21203/RS.3.RS-66632/V1>.
- [12] Amir K. COVID-19 and its related stigma: A qualitative study among survivors in Kampala, Uganda. *Stigma Heal* 2021. <https://doi.org/10.1037/SAH0000325>.
- [13] Imran N, Afzal H, Aamer I, Hashmi A, Shabbir B, Asif A, et al. Scarlett letter: A study based on experience of stigma by COVID-19 patients in quarantine. *Pakistan J Med Sci* 2020;36:1471–7. <https://doi.org/10.12669/pjms.36.7.3606>.
- [14] TD D, L A, S S, M B, S S, T P, et al. Risk of COVID-19-related bullying, harassment and stigma among healthcare workers: an analytical cross-sectional global study. *BMJ Open* 2020;10. <https://doi.org/10.1136/BMJOPEN-2020-046620>.
- [15] Fife BL, Wright ER. The dimensionality of stigma: A comparison of its impact on the self of persons with HIV/AIDS and cancer. *J Health Soc Behav* 2000;41:50–67. <https://doi.org/10.2307/2676360>.
- [16] S E, A M, M S. [German Version of the Social Impact Scale (SIS-D)--Pilot Testing of an Instrument for Measuring Experienced Stigmatization in a Sample of Cancer Patients]. *Psychother Psychosom Med Psychol* 2015;65:183–90. <https://doi.org/10.1055/S-0034-1398523>.
- [17] V G, S S. A qualitative inquiry into stigma among patients with Covid-19 in Chennai, India. *Indian J Med Ethics* 2021;VI:1–21. <https://doi.org/10.20529/IJME.2021.013>.
- [18] D B, T S, SK V, S S. Stigma and Discrimination During COVID-19 Pandemic. *Front Public Heal* 2021;8. <https://doi.org/10.3389/FPUH.2020.577018>.
- [19] Li J, Liang W, Yuan B, Zeng G. Internalized Stigmatization, Social Support, and Individual Mental Health Problems in the Public Health Crisis. *Int J Environ Res Public Health* 2020;17:1–14. <https://doi.org/10.3390/IJERPH17124507>.
- [20] D A, JA M, M O. The psychological distress and mental health disorders from COVID-19 stigmatization in Ghana. *Soc Sci Humanit Open* 2021;4:100186. <https://doi.org/10.1016/J.SSAHO.2021.100186>.
- [21] Son H-M, Choi W-H, Hwang Y-H, Yang H-R. The Lived Experiences of COVID-19 Patients in South Korea: A Qualitative Study. *Int J Environ Res Public Health* 2021;18. <https://doi.org/10.3390/ijerph18147419>.
- [22] Chii C, Hospital C, Permaisuri R, Xin B, Lim J, Raja H, et al. Experiences of Social Stigma Among Patients Tested Positive for COVID-19 and Their Family Members: A Qualitative Study 2021. <https://doi.org/10.21203/RS.3.RS-153721/V1>.
- [23] Roelen K, Ackley C, Boyce P, Farina N, Ripoll S. COVID-19 in LMICs: The Need to Place Stigma Front and Centre to Its Response. *Eur J Dev Res* 2020;32:1592–612. <https://doi.org/10.1057/s41287-020-00316-6>.

- 1  
2  
3 [24] Chen Y, Jin J, Zhang X, Zhang Q, Dong W, Chen C. Reducing Objectification Could Tackle Stigma in the  
4 COVID-19 Pandemic: Evidence From China. *Front Psychol* 2021;12:664422.  
5 <https://doi.org/10.3389/FPSYG.2021.664422>.
- 6 [25] Singh S, Bhutani S, Fatima H. Surviving the stigma: lessons learnt for the prevention of COVID-19 stigma  
7 and its mental health impact. *Ment Heal Soc Incl* 2020;24:145–9. [https://doi.org/10.1108/MHSI-05-](https://doi.org/10.1108/MHSI-05-2020-0030)  
8 [2020-0030](https://doi.org/10.1108/MHSI-05-2020-0030).
- 9 [26] Logie CH, James LI, Tharao W, Loutfy MR. HIV, gender, race, sexual orientation, and sex work: A  
10 qualitative study of intersectional stigma experienced by HIV-positive women in Ontario, Canada. *PLoS*  
11 *Med* 2011;8. <https://doi.org/10.1371/JOURNAL.PMED.1001124>.
- 12 [27] A C, S Z, A M. Stigma, shame, and blame experienced by patients with lung cancer: qualitative study.  
13 *BMJ* 2004;328:1470–3. <https://doi.org/10.1136/BMJ.38111.639734.7C>.
- 14 [28] D’Arienzo M, Coniglio A. Assessment of the SARS-CoV-2 basic reproduction number, R0, based on the  
15 early phase of COVID-19 outbreak in Italy. *Biosaf Heal* 2020;2:57.  
16 <https://doi.org/10.1016/J.BSHEAL.2020.03.004>.
- 17 [29] M H, S VDM. The fight against stigma: an overview of stigma-reduction strategies and interventions.  
18 *Psychol Health Med* 2006;11:353–63. <https://doi.org/10.1080/13548500600595327>.
- 19 [30] Logie CH. Lessons learned from HIV can inform our approach to COVID-19 stigma. *J Int AIDS Soc*  
20 2020;23:e25504. <https://doi.org/10.1002/JIA2.25504>.
- 21 [31] M A-A, A T-B, M M-L. Stigma in COVID-19: A barrier to seek medical care and family support. *Med J*  
22 *Islam Repub Iran* 2020;34. <https://doi.org/10.34171/MJIRI.34.98>.
- 23 [32] Lewis D. Superspreading drives the COVID pandemic - and could help to tame it. *Nature* 2021;590:544–  
24 6. <https://doi.org/10.1038/D41586-021-00460-X>.
- 25 [33] Germany: Hamburg police clear neighborhood after thousands show up to party | News | DW |  
26 30.05.2021 n.d. [https://www.dw.com/en/germany-hamburg-police-clear-neighborhood-after-](https://www.dw.com/en/germany-hamburg-police-clear-neighborhood-after-thousands-show-up-to-party/a-57717566)  
27 [thousands-show-up-to-party/a-57717566](https://www.dw.com/en/germany-hamburg-police-clear-neighborhood-after-thousands-show-up-to-party/a-57717566) (accessed September 27, 2021).
- 28 [34] ‘Everyone was drenched in the virus’: was this Austrian ski resort a Covid-19 ground zero? |  
29 Coronavirus | The Guardian n.d. [https://www.theguardian.com/world/2020/sep/05/everyone-was-](https://www.theguardian.com/world/2020/sep/05/everyone-was-drenched-in-the-virus-was-this-austrian-ski-resort-a-covid-19-ground-zero)  
30 [drenched-in-the-virus-was-this-austrian-ski-resort-a-covid-19-ground-zero](https://www.theguardian.com/world/2020/sep/05/everyone-was-drenched-in-the-virus-was-this-austrian-ski-resort-a-covid-19-ground-zero) (accessed September 27,  
31 2021).
- 32 [35] Y Y, YJ Z, QE Z, L Z, T C, T J, et al. COVID-19-related stigma and its sociodemographic correlates: a  
33 comparative study. *Global Health* 2021;17. <https://doi.org/10.1186/S12992-021-00705-4>.
- 34 [36] HO L, A B, D H, J C. YouTube as a source of information on COVID-19: a pandemic of misinformation?  
35 *BMJ Glob Heal* 2020;5. <https://doi.org/10.1136/BMJGH-2020-002604>.
- 36  
37  
38  
39  
40  
41  
42  
43  
44  
45  
46  
47  
48  
49  
50  
51  
52  
53  
54  
55  
56  
57  
58  
59  
60

1  
2  
3  
4  
5  
6  
7  
8  
9  
10  
11  
12  
13  
14  
15  
16  
17  
18  
19  
20  
21  
22  
23  
24  
25  
26  
27  
28  
29  
30  
31  
32  
33  
34  
35  
36  
37  
38  
39  
40  
41  
42  
43  
44  
45  
46  
47  
48  
49  
50  
51  
52  
53  
54  
55  
56  
57  
58  
59  
60

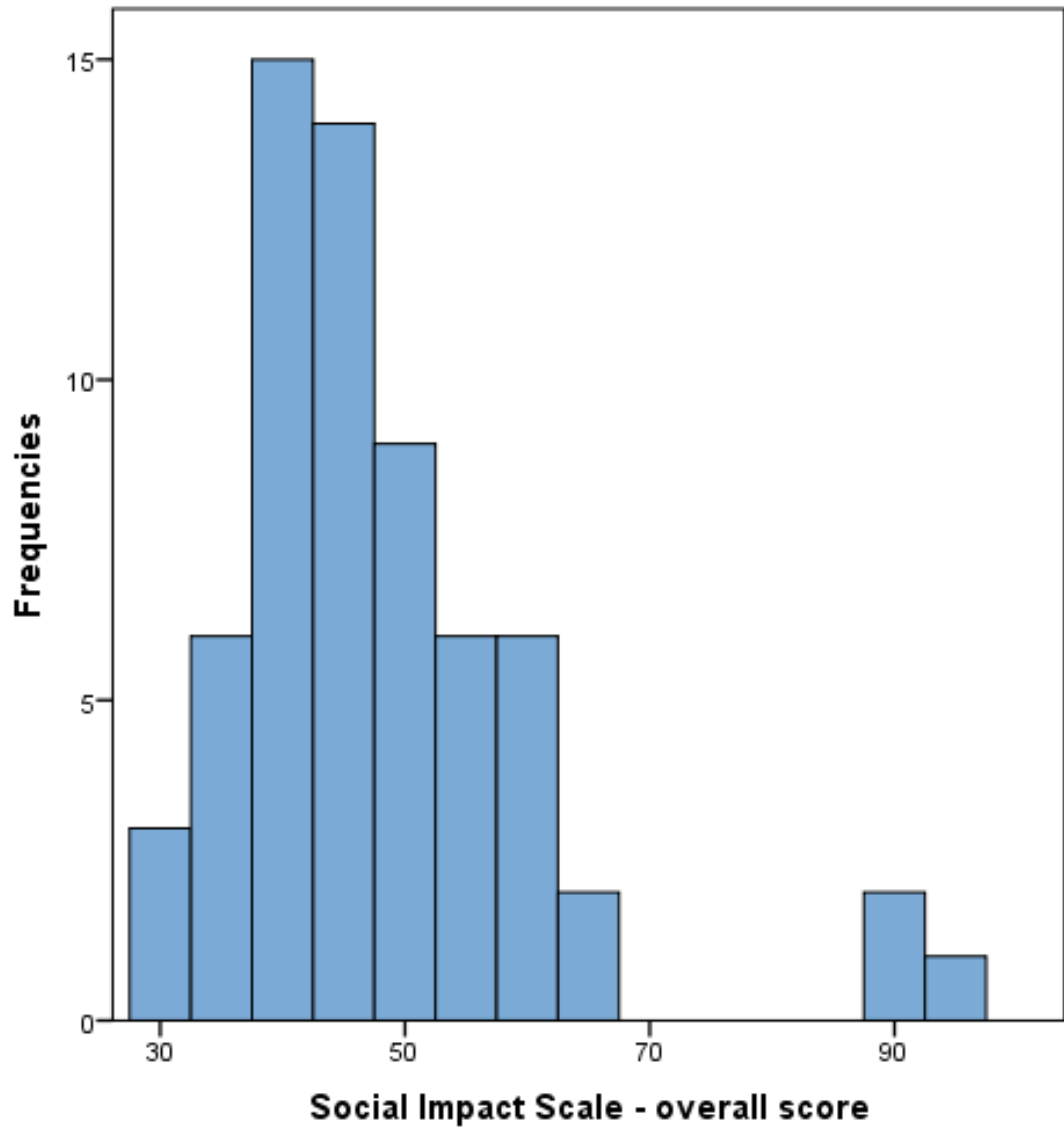

only

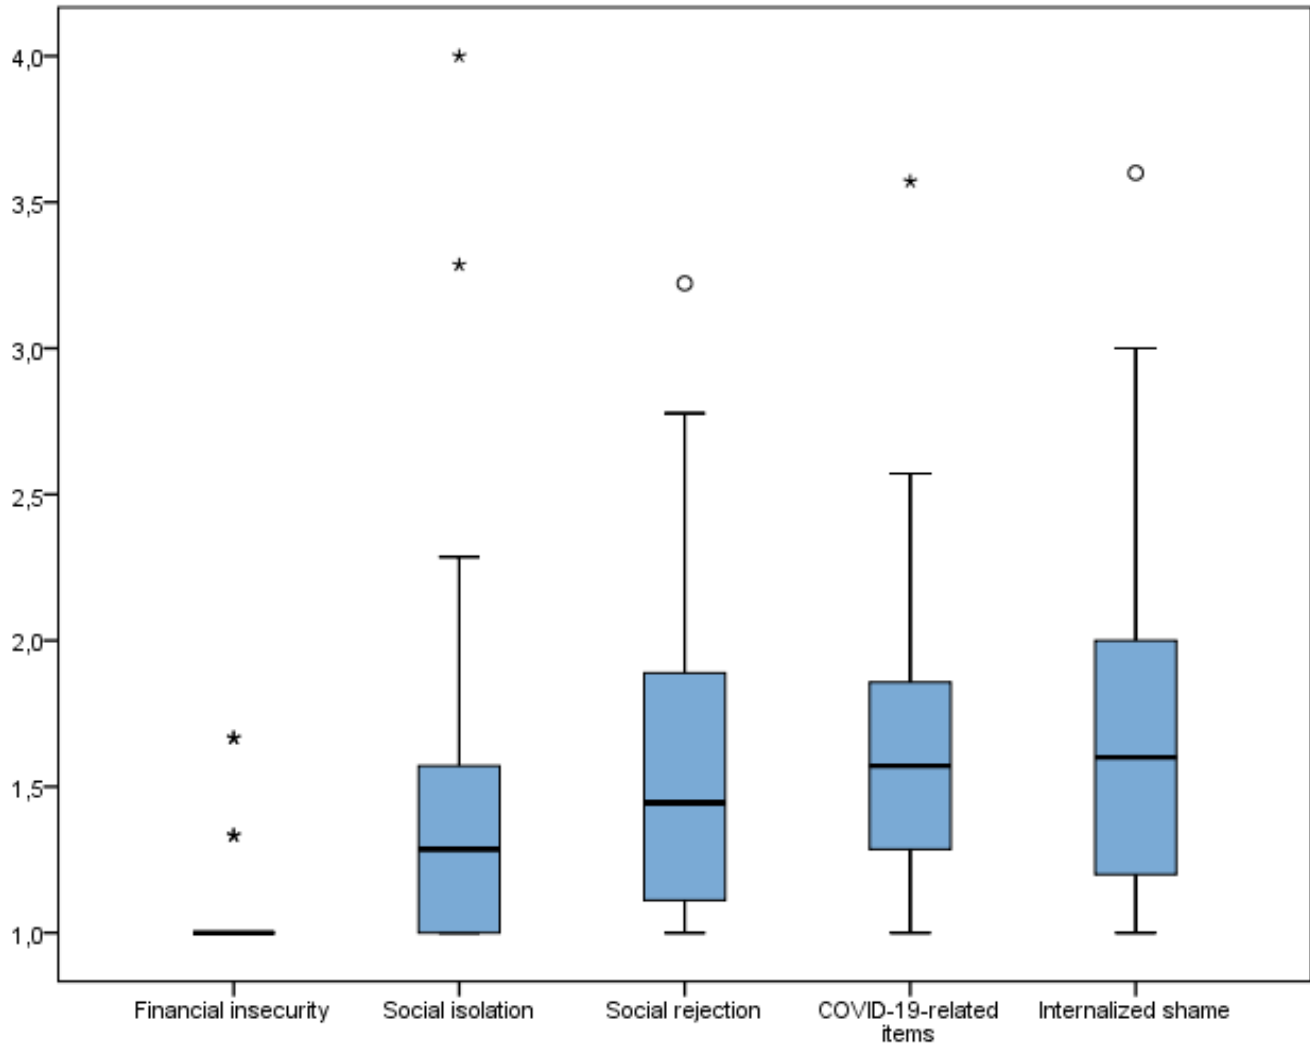

view only



## Experienced stigma

## Applied coping strategies

1  
2  
3  
4  
5  
6  
7  
8  
9  
10  
11  
12  
13  
14  
15  
16  
17  
18  
19  
20  
21  
22  
23  
24  
25  
26  
27  
28  
29  
30  
31  
32  
33  
34  
35  
36  
37  
38  
39  
40  
41

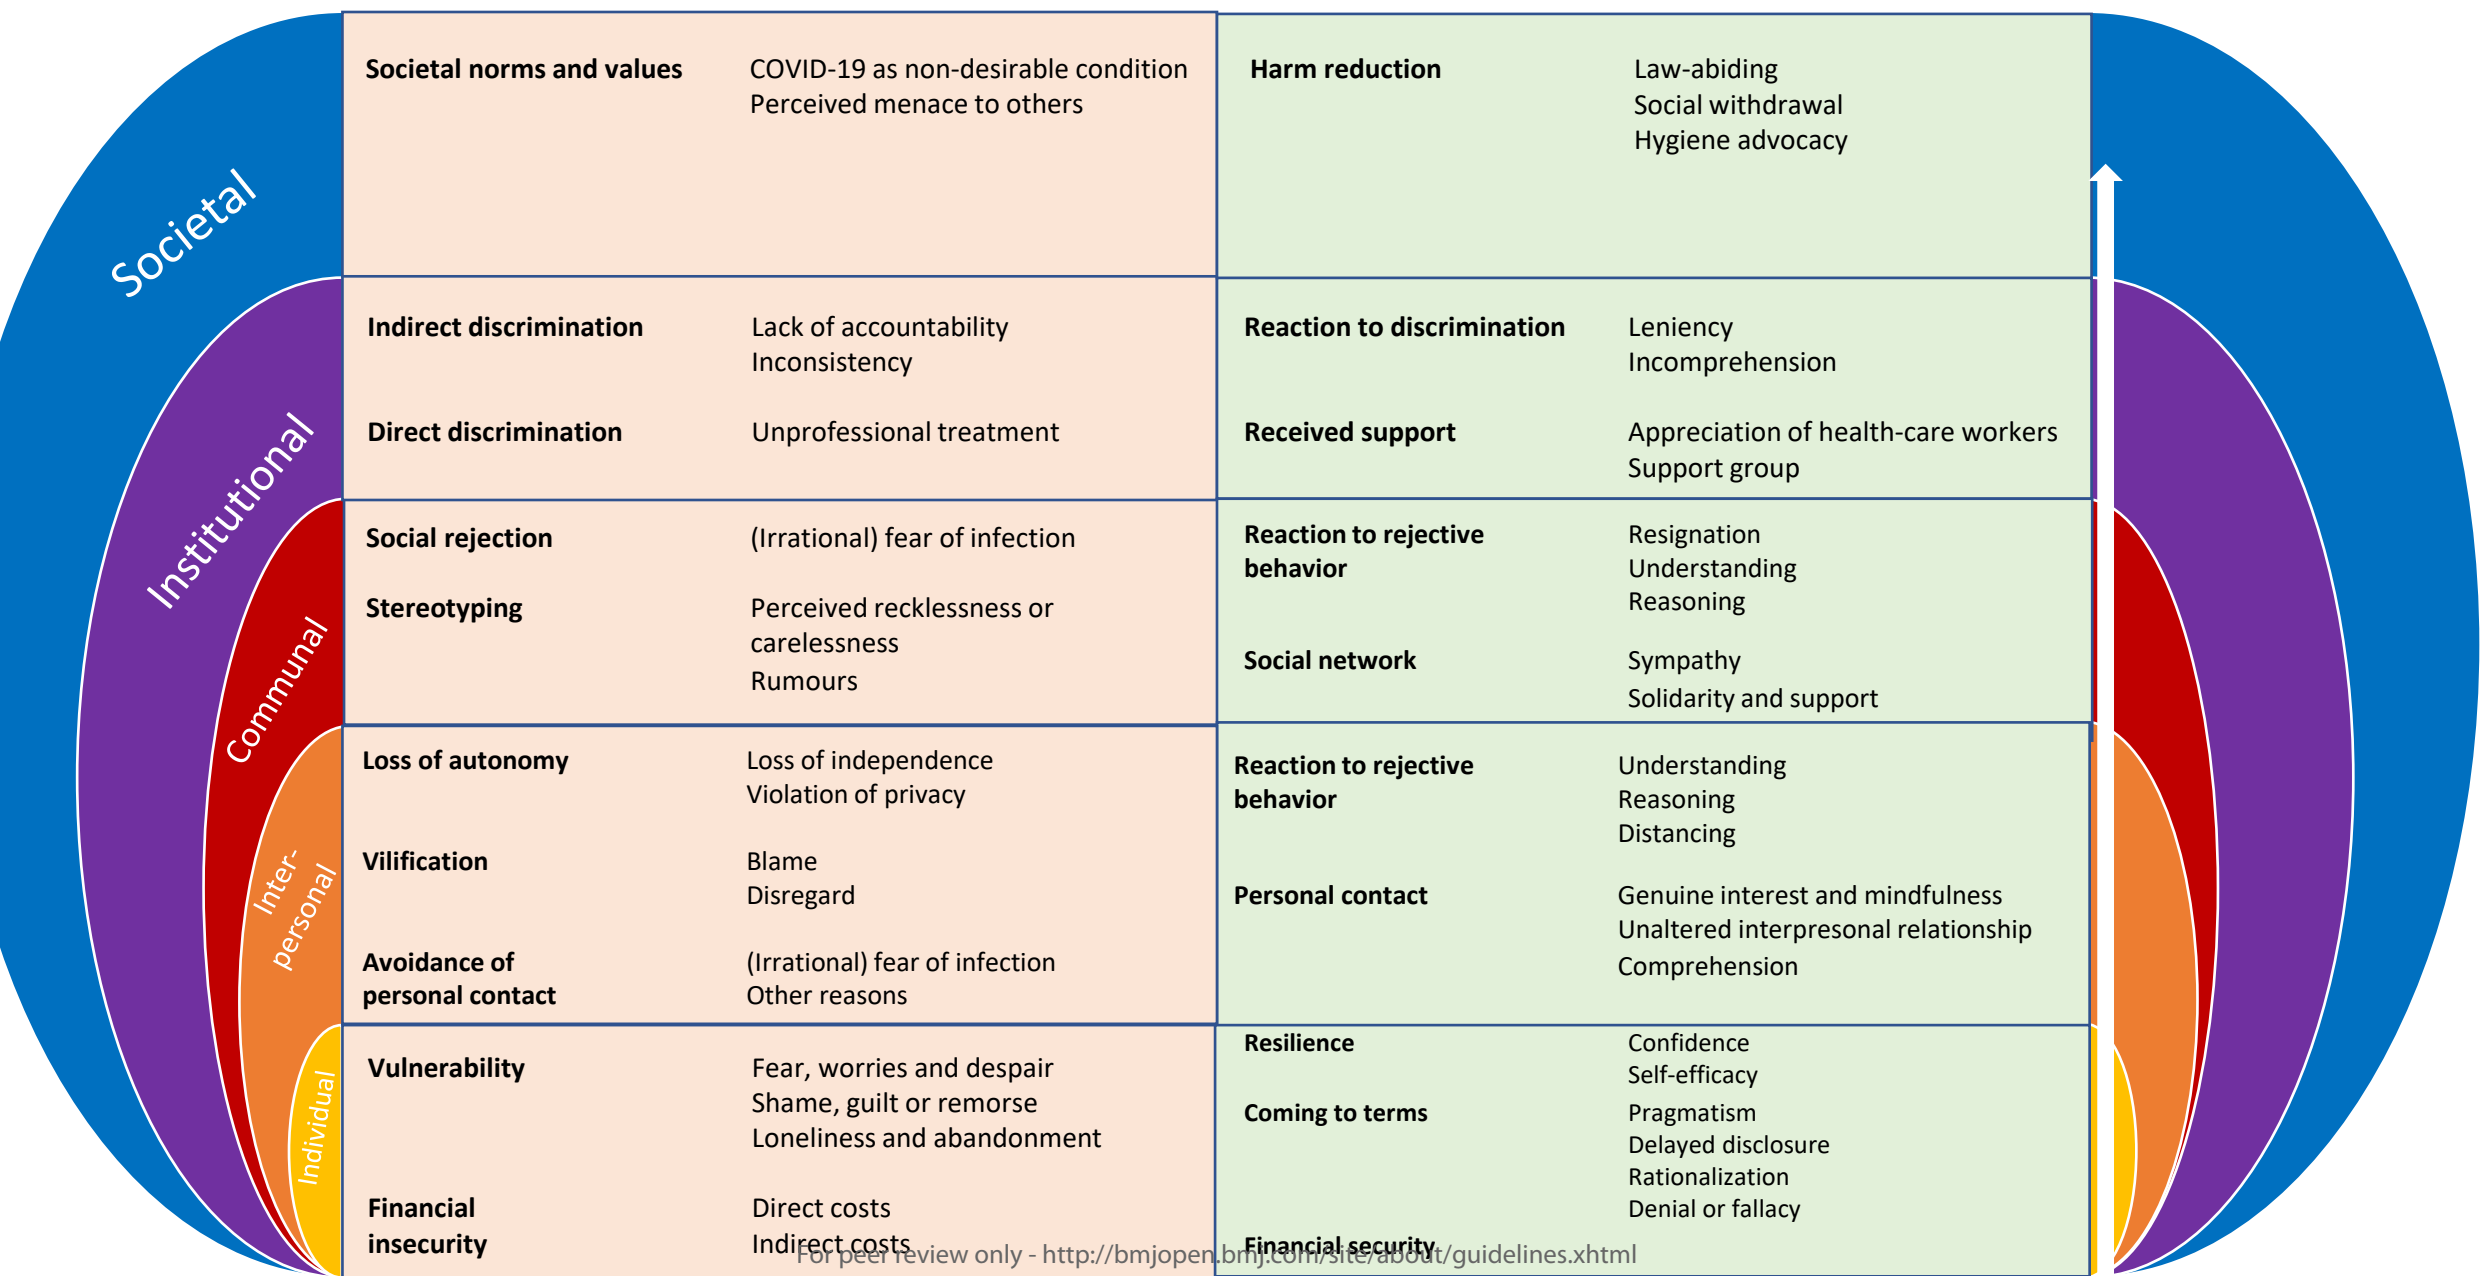

## STROBE Statement—checklist of items that should be included in reports of observational studies

|                              | Item No | Recommendation                                                                                                                                                                                                                                                                                                                                                                                                                                                         | Page No |
|------------------------------|---------|------------------------------------------------------------------------------------------------------------------------------------------------------------------------------------------------------------------------------------------------------------------------------------------------------------------------------------------------------------------------------------------------------------------------------------------------------------------------|---------|
| <b>Title and abstract</b>    | 1       | (a) Indicate the study's design with a commonly used term in the title or the abstract                                                                                                                                                                                                                                                                                                                                                                                 | 1 and 2 |
|                              |         | (b) Provide in the abstract an informative and balanced summary of what was done and what was found                                                                                                                                                                                                                                                                                                                                                                    | 2       |
| <b>Introduction</b>          |         |                                                                                                                                                                                                                                                                                                                                                                                                                                                                        |         |
| Background/rationale         | 2       | Explain the scientific background and rationale for the investigation being reported                                                                                                                                                                                                                                                                                                                                                                                   | 4       |
| Objectives                   | 3       | State specific objectives, including any prespecified hypotheses                                                                                                                                                                                                                                                                                                                                                                                                       | 4       |
| <b>Methods</b>               |         |                                                                                                                                                                                                                                                                                                                                                                                                                                                                        |         |
| Study design                 | 4       | Present key elements of study design early in the paper                                                                                                                                                                                                                                                                                                                                                                                                                | 5       |
| Setting                      | 5       | Describe the setting, locations, and relevant dates, including periods of recruitment, exposure, follow-up, and data collection                                                                                                                                                                                                                                                                                                                                        | 5       |
| Participants                 | 6       | (a) <i>Cohort study</i> —Give the eligibility criteria, and the sources and methods of selection of participants. Describe methods of follow-up<br><i>Case-control study</i> —Give the eligibility criteria, and the sources and methods of case ascertainment and control selection. Give the rationale for the choice of cases and controls<br><i>Cross-sectional study</i> —Give the eligibility criteria, and the sources and methods of selection of participants | 5       |
|                              |         | (b) <i>Cohort study</i> —For matched studies, give matching criteria and number of exposed and unexposed<br><i>Case-control study</i> —For matched studies, give matching criteria and the number of controls per case                                                                                                                                                                                                                                                 |         |
| Variables                    | 7       | Clearly define all outcomes, exposures, predictors, potential confounders, and effect modifiers. Give diagnostic criteria, if applicable                                                                                                                                                                                                                                                                                                                               | 5       |
| Data sources/<br>measurement | 8*      | For each variable of interest, give sources of data and details of methods of assessment (measurement). Describe comparability of assessment methods if there is more than one group                                                                                                                                                                                                                                                                                   | 5       |
| Bias                         | 9       | Describe any efforts to address potential sources of bias                                                                                                                                                                                                                                                                                                                                                                                                              | 5       |
| Study size                   | 10      | Explain how the study size was arrived at                                                                                                                                                                                                                                                                                                                                                                                                                              | 5       |
| Quantitative variables       | 11      | Explain how quantitative variables were handled in the analyses. If applicable, describe which groupings were chosen and why                                                                                                                                                                                                                                                                                                                                           | 5       |
| Statistical methods          | 12      | (a) Describe all statistical methods, including those used to control for confounding                                                                                                                                                                                                                                                                                                                                                                                  | 5       |
|                              |         | (b) Describe any methods used to examine subgroups and interactions                                                                                                                                                                                                                                                                                                                                                                                                    | 5       |
|                              |         | (c) Explain how missing data were addressed                                                                                                                                                                                                                                                                                                                                                                                                                            | 5       |
|                              |         | (d) <i>Cohort study</i> —If applicable, explain how loss to follow-up was addressed<br><i>Case-control study</i> —If applicable, explain how matching of cases and controls was addressed<br><i>Cross-sectional study</i> —If applicable, describe analytical methods taking account of sampling strategy                                                                                                                                                              | 5       |
|                              |         | (e) Describe any sensitivity analyses                                                                                                                                                                                                                                                                                                                                                                                                                                  | 5       |

Continued on next page

1  
2  
3  
4  
5  
6  
7  
8  
9  
10  
11  
12  
13  
14  
15  
16  
17  
18  
19  
20  
21  
22  
23  
24  
25  
26  
27  
28  
29  
30  
31  
32  
33  
34  
35  
36  
37  
38  
39  
40  
41  
42  
43  
44  
45  
46  
47  
48  
49  
50  
51  
52  
53  
54  
55  
56  
57  
58  
59  
60**Results**

|                  |     |                                                                                                                                                                                                              |      |
|------------------|-----|--------------------------------------------------------------------------------------------------------------------------------------------------------------------------------------------------------------|------|
| Participants     | 13* | (a) Report numbers of individuals at each stage of study—eg numbers potentially eligible, examined for eligibility, confirmed eligible, included in the study, completing follow-up, and analysed            | 7    |
|                  |     | (b) Give reasons for non-participation at each stage                                                                                                                                                         | (7)  |
|                  |     | (c) Consider use of a flow diagram                                                                                                                                                                           | n.a. |
| Descriptive data | 14* | (a) Give characteristics of study participants (eg demographic, clinical, social) and information on exposures and potential confounders                                                                     | 5    |
|                  |     | (b) Indicate number of participants with missing data for each variable of interest                                                                                                                          | (7)  |
|                  |     | (c) <i>Cohort study</i> —Summarise follow-up time (eg, average and total amount)                                                                                                                             | n.a. |
| Outcome data     | 15* | <i>Cohort study</i> —Report numbers of outcome events or summary measures over time                                                                                                                          | n.a. |
|                  |     | <i>Case-control study</i> —Report numbers in each exposure category, or summary measures of exposure                                                                                                         | n.a. |
|                  |     | <i>Cross-sectional study</i> —Report numbers of outcome events or summary measures                                                                                                                           | 7    |
| Main results     | 16  | (a) Give unadjusted estimates and, if applicable, confounder-adjusted estimates and their precision (eg, 95% confidence interval). Make clear which confounders were adjusted for and why they were included | 7    |
|                  |     | (b) Report category boundaries when continuous variables were categorized                                                                                                                                    | n.a. |
|                  |     | (c) If relevant, consider translating estimates of relative risk into absolute risk for a meaningful time period                                                                                             | n.a. |
| Other analyses   | 17  | Report other analyses done—eg analyses of subgroups and interactions, and sensitivity analyses                                                                                                               | 8    |

**Discussion**

|                  |    |                                                                                                                                                                            |       |
|------------------|----|----------------------------------------------------------------------------------------------------------------------------------------------------------------------------|-------|
| Key results      | 18 | Summarise key results with reference to study objectives                                                                                                                   | 13    |
| Limitations      | 19 | Discuss limitations of the study, taking into account sources of potential bias or imprecision. Discuss both direction and magnitude of any potential bias                 | 15    |
| Interpretation   | 20 | Give a cautious overall interpretation of results considering objectives, limitations, multiplicity of analyses, results from similar studies, and other relevant evidence | 13/14 |
| Generalisability | 21 | Discuss the generalisability (external validity) of the study results                                                                                                      | 14    |

**Other information**

|         |    |                                                                                                                                                               |   |
|---------|----|---------------------------------------------------------------------------------------------------------------------------------------------------------------|---|
| Funding | 22 | Give the source of funding and the role of the funders for the present study and, if applicable, for the original study on which the present article is based | 1 |
|---------|----|---------------------------------------------------------------------------------------------------------------------------------------------------------------|---|

\*Give information separately for cases and controls in case-control studies and, if applicable, for exposed and unexposed groups in cohort and cross-sectional studies.

**Note:** An Explanation and Elaboration article discusses each checklist item and gives methodological background and published examples of transparent reporting. The STROBE checklist is best used in conjunction with this article (freely available on the Web sites of PLoS Medicine at <http://www.plosmedicine.org/>, Annals of Internal Medicine at <http://www.annals.org/>, and Epidemiology at <http://www.epidem.com/>). Information on the STROBE Initiative is available at [www.strobe-statement.org](http://www.strobe-statement.org).

# BMJ Open

## Experienced stigma and applied coping strategies during the COVID-19 pandemic in Germany - A mixed-methods study

|                                 |                                                                                                                                                                                                                                                                                                                                                                  |
|---------------------------------|------------------------------------------------------------------------------------------------------------------------------------------------------------------------------------------------------------------------------------------------------------------------------------------------------------------------------------------------------------------|
| Journal:                        | <i>BMJ Open</i>                                                                                                                                                                                                                                                                                                                                                  |
| Manuscript ID                   | bmjopen-2021-059472.R1                                                                                                                                                                                                                                                                                                                                           |
| Article Type:                   | Original research                                                                                                                                                                                                                                                                                                                                                |
| Date Submitted by the Author:   | 12-May-2022                                                                                                                                                                                                                                                                                                                                                      |
| Complete List of Authors:       | Peters, Lynn; University Hospital Ulm, Internal Medicine III, Division of Infectious Diseases<br>Burkert, Sanne; University Hospital Ulm, Internal Medicine III, Division of Infectious Diseases<br>Brenner, Cecilia; Regional Office of Communicable Diseases<br>Grüner, Beate; University Hospital Ulm, Internal Medicine III, Division of Infectious Diseases |
| <b>Primary Subject Heading</b>: | Infectious diseases                                                                                                                                                                                                                                                                                                                                              |
| Secondary Subject Heading:      | Global health, Infectious diseases, Mental health, Qualitative research, Sociology                                                                                                                                                                                                                                                                               |
| Keywords:                       | COVID-19, MENTAL HEALTH, SOCIAL MEDICINE                                                                                                                                                                                                                                                                                                                         |
|                                 |                                                                                                                                                                                                                                                                                                                                                                  |

SCHOLARONE™  
Manuscripts



I, the Submitting Author has the right to grant and does grant on behalf of all authors of the Work (as defined in the below author licence), an exclusive licence and/or a non-exclusive licence for contributions from authors who are: i) UK Crown employees; ii) where BMJ has agreed a CC-BY licence shall apply, and/or iii) in accordance with the terms applicable for US Federal Government officers or employees acting as part of their official duties; on a worldwide, perpetual, irrevocable, royalty-free basis to BMJ Publishing Group Ltd ("BMJ") its licensees and where the relevant Journal is co-owned by BMJ to the co-owners of the Journal, to publish the Work in this journal and any other BMJ products and to exploit all rights, as set out in our [licence](#).

The Submitting Author accepts and understands that any supply made under these terms is made by BMJ to the Submitting Author unless you are acting as an employee on behalf of your employer or a postgraduate student of an affiliated institution which is paying any applicable article publishing charge ("APC") for Open Access articles. Where the Submitting Author wishes to make the Work available on an Open Access basis (and intends to pay the relevant APC), the terms of reuse of such Open Access shall be governed by a Creative Commons licence – details of these licences and which [Creative Commons](#) licence will apply to this Work are set out in our licence referred to above.

Other than as permitted in any relevant BMJ Author's Self Archiving Policies, I confirm this Work has not been accepted for publication elsewhere, is not being considered for publication elsewhere and does not duplicate material already published. I confirm all authors consent to publication of this Work and authorise the granting of this licence.

1  
2  
3  
4  
5 1 Experienced stigma and applied coping strategies during the  
6  
7 2 COVID-19 pandemic in Germany  
8

9  
10 3 - A mixed methods study -  
11

12 4  
13  
14 5 **Lynn Peters<sup>1\*</sup>, Sanne Burkert<sup>1</sup>, Cecilia Brenner<sup>2</sup>, Beate Grüner<sup>1</sup>**  
15

- 16 6  
17  
18 7 1) University Hospital of Ulm, Department of Internal Medicine III, Division of Infectious  
19 8 Diseases, Ulm, Germany  
20 9 2) Regional Office of Communicable Diseases, Uppsala, Uppsala Region, Sweden  
21 10  
22  
23 11

24  
25 12 \* Corresponding author  
26

27 13 E-Mail: [lynn.peters@uniklinik-ulm.de](mailto:lynn.peters@uniklinik-ulm.de)  
28  
29 14  
30  
31 15  
32  
33 16  
34  
35  
36  
37  
38  
39  
40  
41  
42  
43  
44  
45  
46  
47  
48  
49  
50  
51  
52  
53  
54  
55  
56  
57  
58  
59  
60

## 17 Abstract

18 **Objective** Health-related stigma is considered a social determinant of health equity and a hidden  
19 burden of disease. This study aimed to assess the level and dimensions of stigma and respective coping  
20 mechanisms in COVID-19-survivors.

21 **Methods** A mixed-methods study with sequential explanatory design was conducted at the  
22 University Hospital of Ulm, Germany. Stigma was assessed using the Social Impact Scale (SIS) including  
23 adult COVID-19 survivors with mild to severe disease. Subsequently, 14 participants were sampled with  
24 regard to gender, age and severity of disease for in-depth interviews to understand how stigma was  
25 experienced and coping strategies were applied. The questionnaire was analysed using descriptive  
26 statistics, *t*-test and ANOVA. Content analysis was used for qualitative data.

27 **Results** From 61 participants, 58% were male and mean age was 51 years. The quantitative  
28 analysis of the SIS indicated an intermediate level of experienced stigma. Participants experienced  
29 stigma mainly as 'social rejection' ( $M = 14.22$ ,  $SD = 4.91$ ), followed by 'social isolation' ( $M = 10.17$ ,  $SD$   
30  $= 4.16$ ) and 'internalized shame' ( $M = 8.39$ ,  $SD = 3.32$ ). There was no significant difference in  
31 experienced stigma regarding gender, education, occupational status, or residual symptoms. However,  
32 participants between 30 and 39 experienced higher levels of stigma than other age groups ( $p = 0.034$ ).  
33 The qualitative analysis revealed how stigma seemed to arise from misconceptions creating irrational  
34 fear of infection, leading to stereotyping, vilification, discrimination, and social exclusion of COVID-19  
35 survivors, leaving them feeling vulnerable. Stigma cut through all social levels, from the individual level  
36 at the bottom to the institutional and societal level at the top. Social networks protected from  
37 experiencing stigma.

38 **Conclusion** COVID-19-related stigma is a relevant burden in the ongoing pandemic. Providing  
39 accurate information and exposing misinformation on disease prevention and treatment seems key to  
40 end COVID-19 related stigma.

## 45 Strengths and limitations of this study

### 46 *Strengths*

- 47 • Mixed-methods approach to gain an in-depth understanding of COVID-19 related stigma and  
48 applied coping strategies
- 49 • Development of a comprehensive framework that might serve as a template for future  
50 research in health-related stigma
- 51 • Detailed list of quotes for every theme to increase transparency, objectivity, and traceability

### 52 *Limitations*

- 53 • Telephone interviews instead of face-to-face interviews because of contact regulations
- 54 • Single-centre study design
- 55 • low response rate, probably due to the sensitive nature of the topic, resulting in a  
56 comparatively low quantitative sample size
- 57 • Lack of an instrument particularly designed to assess stigma in COVID-19 survivors;  
58 Application of a questionnaire designed for people living with HIV/AIDS or cancer

60

## 61 Objective

62 Health-related stigma is a social phenomenon, which implies a negative attitude towards people with  
63 a certain condition (1,2). Stigma occurs in different forms (3): It can result from assumed attitudes of  
64 others (perceived stigma), discriminatory behaviours (enacted stigma), a shift to a devalued self-  
65 perception (internalized stigma) and inequities embedded in policies, institutions, and social  
66 organizations (structural stigma). Regarding health, stigma is often seen as a hidden burden of disease  
67 (4) and a social determinant of health and health inequity (5). It generates psychological stress (6) and  
68 causes affected people to hide their condition with severe consequences for their own health, and in  
69 case of infectious diseases, for public health (7). In the context of the COVID-19 (coronavirus disease  
70 2019) pandemic, the risk of stigmatization has been addressed early (8–10) and reports of  
71 discrimination against patients and survivors have accumulated (11). Across the globe, people infected  
72 with or recovered from SARS-CoV-2 (Severe Acute Respiratory Syndrome Coronavirus-2) became a  
73 target of ostracism, humiliation, harassment and even violence. Studies from Pakistan, Uganda,  
74 Malaysia, India, China, Ghana, Iran and Brazil found that COVID-19 survivors and even their families  
75 were often rejected from social life or essential services and felt humiliated (12–22). COVID-19  
76 survivors were blamed for the disease (13,16,17) and perceived as a source of infection even after  
77 being cured (12,17,22,23), some reported financial hardship as a consequence (13,20,24). Stereotyping  
78 was common (16), especially blaming the poor, labourers and migrants (17) or people of seemingly  
79 Asian origin (25–27). Research from Malaysia, Iran and Tunisia found that affected people made efforts  
80 to hide the infection (16,21,28). Due to stigma, people with suspected COVID-19 might avoid testing  
81 or treatment facilities, leading to poor health outcomes and the further spread of the virus.  
82 So far, most studies were conducted in low- and middle-income countries and little is known about the  
83 phenomenon in high-income countries. Labbé et al. (2022) (25) analysed editorial cartoons from  
84 Canadian newspapers and found, amongst others, a stigmatising attitude towards people from certain  
85 geographical areas with high SARS-CoV-2 incidence rates. A recent study from Spain using a survey  
86 among the general population could demonstrate that discrimination and internalised stigma  
87 increased and decreased with the dynamic of the pandemic (29). To the best of our knowledge, no  
88 study so far assessed the level and dimensions of stigma and applied coping strategies based on the  
89 experiences of COVID-19 survivors in a high-income country.

90

91



## 92 Methods

### 93 Sampling and data collection

94 We conducted a sequential explanatory mixed-method study in the area of Ulm, Germany. Every adult  
 95 with positive SARS-CoV-2-PCR nasopharyngeal swab was included that presented either at the  
 96 hospital's outpatient COVID-19-testing centre, the hospital's emergency room or that was admitted to  
 97 the hospital between March and May 2020 (n = 150). Exclusion criteria were age < 18 years and death  
 98 during hospitalisation. The 'Social Impact Scale' (SIS) questionnaire (quantitative methods), a form  
 99 assessing residual symptoms and socio-economic factors and a form on which participants could  
 100 optionally provide a phone number for the phone interviews were sent to the COVID-19 survivors 3 to  
 101 9 months *post infectionem*. After the quantitative analysis confirmed experienced stigma in COVID-19  
 102 survivors, a phenomenological approach was employed using in-depth interviews (qualitative  
 103 methods) to explore why and how stigma was experienced and to assess possible coping strategies.  
 104 The study was approved by the ethical board of the University of Ulm (No. 315/20).

### 105 Quantitative methods

#### 106 *The 'Social Impact Scale' questionnaire*

107 Experienced stigma was assessed with the 24-item SIS questionnaire designed by Fife & Wright (2000)  
 108 (30) for people living with HIV/AIDS or cancer and translated to German by Eichhorn et. al. (2015) with  
 109 good psychometric properties (Cronbach's  $\alpha = 0.81 - 0.89$ ) (31). We added 7 additional COVID-19-  
 110 related questions (c.f. Supplementary Material S1), which were evaluated separately. On a 4-point  
 111 Likert scale, participants rate the given statements (items) from 'I strongly disagree' to 'I strongly agree'  
 112 (1 to 4 points) resulting in an overall stigma score. These items are assigned to different dimensions of  
 113 stigma, namely 'social rejection' (9 items), 'internalized shame' (5 items), 'social isolation' (7 items)  
 114 and 'financial insecurity' (3 items) and are evaluated separately.

#### 115 *Statistical analysis*

116 Statistical analyses were performed using IBM SPSS Statistics V23. Descriptive analyses included  
 117 demographic information, post-COVID-19 symptoms, the overall level of stigma and its dimensions.  
 118 Results are reported in means (M) and standard deviation (SD). Univariate analyses were performed  
 119 assessing differences in experienced stigma regarding gender, age groups, education, occupational  
 120 status, and residual symptoms using *t*-Test, ANOVA and correlation where appropriate. Missing data  
 121 were handled by listwise exclusion. A significance level of  $p < 0.05$  was considered significant.

### 122 Qualitative methods

#### 123 *Sampling and data collection*

124 From those participants consenting to an in-depth interview, we purposefully sampled a broad range  
 125 with high and low perceived stigma based on the questionnaire, different severity of disease, gender,  
 126 age, and education to gain diverse accounts of the phenomenon (c.f. Table 1). Data were analysed  
 127 using MAXQDA Plus 2020. The analysis began after the 5<sup>th</sup> interview and data saturation was reached  
 128 after the 11<sup>th</sup>. Three additional interviews were conducted to ensure no new themes emerged,  
 129 resulting in a total number of 14 interviews. The interviews were held in German, being the native  
 130 language of the participants and followed an interview guide (c.f. Supplementary Material S2).  
 131 However, the interviewer (LP) aimed for an open discussion, allowing the interviewee to determine  
 132 which topics to focus on. Due to contact regulations, the interviews were conducted by phone and  
 133 recorded.

|            |         |           |
|------------|---------|-----------|
| Gender (N) | Male: 8 | Female: 6 |
|------------|---------|-----------|

|                                |                            |                                   |                                 |         |
|--------------------------------|----------------------------|-----------------------------------|---------------------------------|---------|
| Age in years                   | Mean: 51.8                 | Median: 52                        | Min: 23                         | Max: 77 |
| ISCED* 2011 level of education | Mean: 3.7                  | Median: 3                         | Min: 2                          | Max: 7  |
| Severity of disease (N)**      | Ambulatory mild disease: 4 | Hospitalised, moderate disease: 6 | Hospitalised, severe disease: 4 |         |
| Length of interview in minutes | Mean: 48                   | Median: 41                        | Min: 18                         | Max: 76 |

\* International Standard Classification of Education ranging from 0 (early childhood education) to 8 (doctorate or equivalent)

\*\*according to the WHO classification (32)

Table 1: Characteristics of interviewees and length of interviews

### *Analysis and trustworthiness*

After transcription, the analysis was conducted in English, i.e. English codes were applied to the German transcripts. Translating the transcripts to English was avoided in order to remain close to the source data and avoid a loss of information. LP used content analysis to develop a preliminary coding scheme from emerging codes and themes (inductive ‘bottom-up’ approach). Coding is the first step in qualitative analysis in which phrases are linked and shapes an idea (33–35), i.e. coding implies computing meaning (36). Subsequently, the interpretation of these rather explicit and descriptive codes generates more latent and subtle subthemes that give a deeper understanding of the phenomenon (37–39). As a final step, overarching themes evolve, which allowed organising the data into a comprehensive framework. To ensure reliability, the coding scheme was subsequently applied to the interviews by SB and BG (deductive ‘top-down’ approach). Deviant codes were discussed within the research team and adjusted (peer-check), resulting in a refined coding scheme. To increase transparency, additional tables with key quotes for each code are attached (c.f. S3 and S4). Using mixed methods allows for methodological triangulation, i.e. assessing the phenomenon from different perspectives.

### *Patient and public involvement*

This research was inspired by patients’ narratives from our post-COVID-19 outpatient department. During follow-up visits, patients moved from physical complaints to social consequences they experienced after having COVID-19, which often involved stigma. The interview guide was informed by those narratives. As mentioned earlier, the interview was designed as an open discussion allowing the participants to prioritise topics and report their experiences freely. However, patients were not involved in designing or recruiting. We aim to offer a lay summary in German on our website to inform participants about the results.

## 161 Results

### 162 Quantitative results

#### 163 *Descriptive results*

164 In total, 61 questionnaires were analysed which equals a response rate of 41%. The socio-economic  
165 characteristics and residual symptoms are displayed in table 2.

| Variable                        | Results (%)                                    | Residual Symptoms    | N                         | %     |       |
|---------------------------------|------------------------------------------------|----------------------|---------------------------|-------|-------|
| Age                             | M = 51 years (SD = 14.6, Min. = 18, Max. = 78) | Dyspnoea on exertion | 11                        | 20.4% |       |
| Gender                          | Male                                           | 58%                  | Fatigue                   | 6     | 12.2% |
|                                 | Female                                         | 42%                  | Paraesthesia              | 5     | 10.2% |
| Education                       | No formal education                            | 0%                   | Cough                     | 4     | 8.2%  |
|                                 | Lower secondary education, no graduation       | 11.5%                | Sore throat               | 4     | 8.2%  |
|                                 | Lower secondary education, graduation          | 9.8%                 | Cephalgia                 | 4     | 8.2%  |
|                                 | Intermediate secondary education               | 26.2%                | Palpitations              | 4     | 8.2%  |
|                                 | Upper secondary education                      | 18.8%                | Rhinorrhoea               | 3     | 6.1%  |
|                                 | High school graduation                         | 34.4%                | Loss of smell and taste   | 3     | 6.1%  |
| Occupation                      | Regularly employed                             | 70.3%                | Diarrhoea                 | 2     | 4.1%  |
|                                 | Unemployed/ receiving pension                  | 15.6%                | Myalgia                   | 2     | 4.1%  |
|                                 | Student/ trainee                               | 6.3%                 | Xerophthalmia             | 2     | 4.1%  |
| People informed about infection | Close family members                           | 98.4%                | Sleeping disorder         | 2     | 4.1%  |
|                                 | Friends                                        | 95.3%                | Loss of hair              | 2     | 4.1%  |
|                                 | Acquaintances                                  | 81.3%                | Lack of attention         | 2     | 4.1%  |
|                                 | Distant relatives                              | 78.1%                | Mucus                     | 1     | 2.0%  |
|                                 | Close co-workers                               | 76.6%                | Dyspnoea without exertion | 0     | 0%    |
|                                 | Neighbours                                     | 73.4%                | Fever                     | 0     | 0%    |
|                                 | Superiors                                      | 71.9%                | Hearing loss              | 0     | 0%    |
|                                 | Distant co-workers                             | 50.0%                | Loss of vision            | 0     | 0%    |

166 Table 2: Socio-economic characteristics and residual symptoms

#### 167 *The Social Impact Scale*

168 Each of the 31 items (24 SIS items and 7 COVID-19-related items) was rated with 1 to 4 points, resulting  
169 in a possible total score of 31 to 124. The total stigma score in our cohort ranged from 31 to 97 with a  
170 mean of 48.1 ( $SD = 13.1$ ), and a median of 45.0 (c.f. Figure 1A). Analysing the dimensions of stigma  
171 based on the 24 SIS items, 'internalized shame' ( $M = 1.68$ ,  $SD = 0.66$ ) and 'social rejection' ( $M = 1.58$ ,  
172  $SD = 0.55$ ) showed the highest levels of stigma, followed by 'social isolation' ( $M = 1.45$ ,  $SD = 0.59$ ).  
173 'Financial insecurity' ( $M = 1.17$ ,  $SD = 0.46$ ) played a minor role (c.f. Figure 1B). The overall mean per  
174 item was 1.55 ( $SD = 0.42$ ). Adapted to the original questionnaire (30), we calculated aggregate means:  
175 'social rejection' showed the highest aggregate mean ( $M = 14.22$ ,  $SD = 4.91$ ), followed by 'social  
176 isolation' ( $M = 10.17$ ,  $SD = 4.16$ ) and 'internalized shame' ( $M = 8.39$ ,  $SD = 3.32$ ) and, ultimately, financial  
177 insecurity ( $M = 3.51$ ,  $SD = 1.38$ ). The data were evenly distributed. Items of special interest are  
178 summarised in table 3.

179

180 *Figure 1. A: Social Impact Scale, overall score. B: Dimensions of stigma. High numbers equal high level of experienced*  
181 *stigma.*

| Items with the highest experienced stigma:                                                            | M    |
|-------------------------------------------------------------------------------------------------------|------|
| 'I feel others are concerned they could catch my illness.'                                            | 2.52 |
| 'I feel guilty because I accidentally might have infected others.*'                                   | 2.03 |
| 'I feel others think I am to blame for my illness.'                                                   | 2.00 |
| 'Due to my illness others seem to feel awkward and tense when they are around me.'                    | 1.97 |
| 'I feel institutions and professionals (health authority, health care workers) treated me unfairly.*' | 1.81 |
| Items with the lowest experienced stigma:                                                             | M    |
| 'I have experienced financial hardship that has affected my relationship with others.'                | 1.08 |
| 'Some family members have rejected me because of my illness.'                                         | 1.11 |

|                                                    |      |
|----------------------------------------------------|------|
| 'My job security has been affected by my illness.' | 1.15 |
|----------------------------------------------------|------|

Table 3: Items of special interest from the questionnaire. \*Additional COVID-19-related questions.

There was no difference in experienced stigma comparing gender ( $t(59) = 0.437, p = 0.664$ ), educational level ( $F(4) = 0.687, p = 0.604$ ), occupational status ( $F(3) = 0.995, p = 0.404$ ) or residual symptoms (composite score of symptoms) ( $r(46) = -0.250, p = 0.093$ ). However, there was a significant difference in age: participants between 30 and 39 experienced higher levels of stigma than other age groups ( $F(6) = 2.499, p = 0.034$ ).

## Qualitative results

The analytical process revealed how COVID-19 survivors experienced stigma as a multi-layered phenomenon: The descriptive codes and latent **subthemes** generated overarching **themes** that represent the societal layer in which stigma was experienced and coping strategies were applied. The following section will guide the reader through each layer, starting with the individual layer and continuing to the immediate and then wider environment. The number of times respective codes were applied throughout the interviews is indicated by (n). To keep this report concise, only one exemplary quote for every code is presented. However, we invite the reader to consult the supplementary materials S3 and S4, which offer additional quotes.

### Theme 1: the individual layer

**Vulnerability** was identified as key subtheme contributing to or resulting from internalized or perceived stigma. Different codes added to increased vulnerability:

Fear, worries and despair (n = 11): *'I was thinking «why me???»... and «I hope this ends well...»'* (female (f), 50-59 y/o); Most participants were worried about the outcome, especially elderly patients and those referred to the hospital.

Shame, guilt or remorse (n = 14): *'Of course you feel bad knowing you infected others'* (f, 20-29 y/o); Although infecting others happened unwittingly in all cases, participants often felt as active 'spreader'. This caused feelings of shame and remorse.

Loneliness and abandonment (n = 14): *'Being on my own was the hardest part.'* (male (m), 60-69 y/o); This feeling often rose from the isolation faced in home-quarantine or single hospital rooms, but also from a perceived lack of reliable information regarding the disease.

On the other hand, **resilience** as coping strategy mitigated the experienced stigma, resulting from: Confidence (n = 5) *'I knew I was getting medication; I was sure that would help, otherwise they wouldn't give it to me. I wasn't worried I would die.'* (m, 60-69 y/o); The elderly putting faith in modern medicine or the young relying on their body's defences felt confident they would be spared from adverse outcomes.

Self-efficacy (n = 2) *'In the beginning it was very hard for me. But as soon as I managed to structure my day, time just flew by.'* (m, 30-39 y/o); Self-efficacy reflects a person's assumed control over a situation and was identified as a rare but resourceful coping strategy.

Additionally, participants indicated different ways of **coming to terms** with the undergone infection: Pragmatism (n = 2): *'I had it [COVID-19], that's all there is. Now I am cured and immune.'* (f, 70-79 y/o); some refused to dwell in the past and did not make a big deal about having had COVID-19. Interestingly, this also occurred in one participant that had been hospitalized for a few days.

Delayed disclosure (n = 3): *'In the beginning, I didn't want to share with anyone. Afterwards, we talked about it.'* (f, 70-79 y/o); Participants from different age groups and with different severity of disease admitted that they needed some time to process before they were able to confide in someone else.

226 Rationalization (n = 2): *'When I was there, it wasn't known to be a hotspot!'* (m, 50-59 y/o); Some  
 227 participants offered a rationale to justify how they got infected. They emphasized that they did not  
 228 deliberately put themselves and thereby others at risk.

229 Denial or fallacy (n = 1): *'Maybe I didn't have it [COVID-19]. I even know couples, where one had it and*  
 230 *the other didn't'* (m, 50-59 y/o). One participant doubted the established diagnosis.

231 **Financial insecurity** concerned comparatively few self-employed participants. This applied to both  
 232 direct and indirect costs, the latter resulting from a loss of income:

233 Direct costs (n = 2): *'If I hadn't had any savings, it would have been problematic.'* (m, 40-49 y/o);

234 Indirect costs (n = 1): *'I have to earn my money with physical labour. When I can't work, I don't earn*  
 235 *money...'* (m, 50-59 y/o);

236 However, most participants were either employed or received pension and hence costs were covered  
 237 by their health insurance, implying **financial security** (n = 8): *'I was on sick leave and got my loan as*  
 238 *usual.'* (f, 20-29 y/o);

## 240 Theme 2: the interpersonal layer

241 Used to a certain level of self-determination and a scope of action, most participants were hit hard by  
 242 the **loss of autonomy**:

243 Loss of independence (n = 5): *'We were all isolated, other people had to take care of us.'* (f, 20-29 y/o);  
 244 Quarantine or being bed-ridden meant depending on others, which was a new situation for many  
 245 participants.

246 Violation of privacy (n = 4): *'I live in a small village and within two hours, everyone knew about it*  
 247 *[COVID-19]'* (f, 20-29 y/o); Transgression of personal boundaries or unauthorized passing of personal  
 248 information left some participants, young and elderly, feeling powerless.

249 Almost every participant suffered some form of **vilification** as perceived or enacted stigma:

250 Blame (n = 9): *'Some people said it is my own fault that I got infected.'* (m, 50-59 y/o). Some patients  
 251 were made responsible for catching SARS-CoV-2 or blamed for unknowingly infecting others. This  
 252 reflects a shift in perspective from passively acquiring a disease to actively spreading it. This change  
 253 from victim to perpetrator was described as particularly hurtful when people had been severely ill from  
 254 COVID-19.

255 Disregard (n = 4): *'They [acquaintances] did not really care about what had happened to me.'* (f, 20-29  
 256 y/o); Lack of concern or misconceptions about what participants were going through left some  
 257 participants frustrated or angry. This was reported by patients with mild symptoms as well as those  
 258 hospitalized.

259 As mentioned earlier, loneliness and abandonment left participants feeling vulnerable. Additional  
 260 **avoidance of personal contact** by others when participants were no longer contagious was hence  
 261 particularly upsetting and by far the most frequently reported form of enacted stigma:

262 (Irrational) fear of infection (n = 27) was presumably the most important driver for the reported  
 263 behaviour of others: *'Many people withdrew from me for a long time.... I think they were still afraid of*  
 264 *getting infected.'* (f, 70-79 y/o);

265 Participants reported different ways in **dealing with the rejective behaviour** of others:

266 Understanding (n = 10); Most participants could at least partly comprehend and therefore excuse this  
 267 behaviour: *'I could totally understand their [friends] behaviour. No one knew exactly how long people*  
 268 *can transmit COVID.'* (f, 20-29 y/o);

269 Reasoning (n = 2); others tended to argue: *'When they [friends] took a step back, I told them there was*  
 270 *no reason, they could hug me, I am no longer contagious.'* (m, 50-59 y/o);



271 Distancing (n = 2) oneself and avoiding emotional involvement and further frustration: *'When I heard*  
 272 *about what others said, I just distanced myself from that.'* (m, 50-59 y/o);

273 Consequently, **personal contact** was much appreciated by all participants and proved one of the most  
 274 powerful coping strategies:

275 Genuine interest and mindfulness (n = 7) regarding the participants' well-being were key elements:  
 276 *'It's very important that there are people who care about you and want to know how you are doing.*  
 277 *My mum called every day to check on me, that felt good.'* (m, 30-39 y/o);

278 Unaltered interpersonal relationship (n = 4), i.e. discovering that 'nothing had changed' made  
 279 participants feel relieved: *'With my friends, it is the same way as it has been before.'* (m, 30-38 y/o).

280 Comprehension (n = 4): *'I talked to a friend, and she could totally relate.'* (f, 20-29 y/o). When sharing  
 281 their stories induced sympathy and comprehension, participants felt that their emotions were  
 282 acknowledged and legitimate.

283

### 284 **Theme 3: the communal layer**

285 The lines between the interpersonal and communal layers are particularly blurry. Thus, codes and  
 286 subthemes emerging are often similar, yet referring to a different social group. While the interpersonal  
 287 layer focuses on close personal relationships, the following section refers to more distant contacts or  
 288 anonymous settings.

289 **Social rejection** plays an important role in enacted stigma. Again, a potential driver identified was:  
 290 (irrational) fear of infection (n = 6): *'When I did my groceries and kept a 2 to 3 meters distance, people*  
 291 *still told me to go further away.... they even changed the side of the street when they saw me.'* (f, 20-  
 292 29 y/o);

293 Additionally, **stereotyping** as perceived stigma was indicated by younger people:

294 Perceived recklessness or carelessness (n = 4): *'Now you [referring to the interviewer] are probably*  
 295 *going to say «how on earth could you go skiing, and how could you go there [place where she got*  
 296 *infected]?!?', but back then it wasn't that obvious....'* (f, 20-29 y/o);

297 Rumours (n = 2): *'In town, everyone acted like they knew better why I was infected'* (f, 20-29 y/o);

298 The **reaction** to experienced stigma on the communal level included:

299 Understanding (n = 3): *'I tried to understand their reaction [people at work] and asked myself, how I*  
 300 *would have reacted in their place? And honestly, I would keep my distance too. That is probably*  
 301 *human.'* (m, 30-39 y/o);

302 Reasoning (n = 2): *'I told them [people in a grocery store] I am no longer contagious and that they don't*  
 303 *need to keep a 10-meter distance. I fact, I am less dangerous than other people.'* (f, 20-29 y/o);

304 Resignation (n = 3), i.e. accepting adverse behaviour without arguing: *'I didn't really bother. Couldn't*  
 305 *change it anyway. (...) You have to take it the way it is.'* (m, 40-49 y/o);

306 **Social network and inclusion** turned out as a valuable resource against experienced stigma:

307 Sympathy (n = 7): *'So many people called during my absence to make sure I am okay, and they were so*  
 308 *happy to hear from me when I called them back.'* (m, 60-69 y/o). For many participants, it was  
 309 important that others cared about them and felt for them.

310 Solidarity and support (n = 7) from friends or neighbours helped many participants to persevere the  
 311 isolation and let them rest assured that they would receive help if needed: *'Many people from our*  
 312 *village offered help and asked if they could get us anything. I was surprised by their willingness to help.'*  
 313 (f, 50-59 y/o);

314

### 315 **Theme 4: the institutional layer**

316 Institutional stigma referred to stigma faced in contact with health authorities, hospital staff, general  
 317 practitioners, and paramedics. Actions directed towards individual participants were labelled **direct**  
 318 **discrimination**, a form of enacted stigma. They resulted mainly from  
 319 Unprofessional treatment (n = 4), which means inappropriate reactions from healthcare workers:  
 320 *'Since I was the second patient in that other hospital, they had a lot of «respect» of me and avoided*  
 321 *coming close to me... that was even worse for me than the [rejecting] behaviour of other people.'* (f,  
 322 20-29 y/o);

323 Structural stigma was also based on regulations affecting COVID-19 patients in general which was  
 324 labelled **indirect discrimination**. Two codes were identified:  
 325 Lack of accountability (n = 10): In many participant's views, health authorities and other institutions  
 326 failed to take responsibility or lacked transparency; *'They [health authorities] gave us a number where*  
 327 *we could call, but no one ever answered the phone.'* (f, 20-29 y/o);  
 328 Inconsistency (n = 4): Due to contradictory information, participants lost trust in health officials and  
 329 felt increasingly insecure: *'They [the health authority] told me on the phone my quarantine ended on*  
 330 *Thursday. Then I got the letter from them saying I needed to stay in quarantine for another 2 weeks.'*  
 331 (m, 50-59 y/o);

332 A first, many participants' **reaction to this discriminatory behaviour** was  
 333 Incomprehension (n = 8): *'I really felt mocked by the health authorities.'* (f, 20-29 y/o); But eventually,  
 334 in retrospect, they often reacted understandingly and forgivingly, which was labelled  
 335 Leniency (n = 8): *'I guess they [the health authorities] were just overwhelmed.'* (m, 50-59 y/o);  
 336 Additionally, **receiving professional support** was much appreciated:  
 337 Appreciation of health-care workers (n = 4): *'He [family doctor] called every day to make sure I was*  
 338 *okay. That felt good.'* (f, 70-79 y/o);  
 339 Support group (n = 2): *'Is there a self-help group for COVID survivors?'* (m, 50-59 y/o);

### 341 **Theme 5: the societal layer**

342 This layer characterized **societal norms and values** which are partly internalized by participants.  
 343 First, COVID-19 was seen as a non-desirable condition (n = 5) and something usually 'others' catch: *'I*  
 344 *was surprised. I never thought we would get it.'* (f, 50-59 y/o);  
 345 Secondly, even if unaware of carrying an infectious virus, participants perceived themselves as a  
 346 menace to others (n = 10) and public health in general. This was the most sensitive subject during the  
 347 interview: Q: *'Do you happen to know if you accidentally infected somebody?'* A: *'I don't want to talk*  
 348 *about that.'* (m, 50-59 y/o);

349 This led to different reactions, which we subsumed as **harm reduction**:  
 350 Law-abiding (n=5): Participants emphasized that they stuck to the regulations and thereby avoided  
 351 spreading the disease: *'When we came back [from a hotspot] we stayed at home. So when we finally*  
 352 *knew we had it [COVID-19], at least I didn't feel guilty, because I knew I didn't infect anyone else.'* (f,  
 353 20-29 y/o);  
 354 Social withdrawal (n = 3): Others reduced social contacts even after COVID-19 was over, often to avoid  
 355 rejective behaviour: *'When my quarantine ended, I didn't ask people to meet. I was afraid they would*  
 356 *react.... in a strange way.'* (f, 20-29 y/o);  
 357 Hygiene advocacy (n = 3): Others propagated hygiene practices as effort to control the disease: *'I tell*  
 358 *everyone they should wear their face masks.'* (f, 70-79 y/o);

## 359 Discussion

### 360 The social impact of COVID-19 in relation to other stigmatizing conditions

361 Regarding the quantitative results, the overall level of experienced stigma was lower in our cohort  
 362 compared to people living with HIV/AIDS or cancer in the United States (30) or Germany (31) (c.f. table  
 363 4). HIV/AIDS is known as a highly stigmatising infection (40), explaining the high level of experienced  
 364 stigma throughout all dimensions. Comparing our results to people with cancer, 'social rejection' and  
 365 'internalized shame' were similar (30) or slightly higher (31) in people with COVID-19. We assume that  
 366 the perceived risk of infecting others with SARS-CoV-2 compared to a non-communicable disease like  
 367 cancer increases feelings of shame and rejection. In contrast to chronic conditions such as HIV/AIDS  
 368 and cancer, stigma towards COVID-19 survivors might decrease over time.

|                      | HIV/AIDS (30)<br>(aggregate means) | Cancer (30)<br>(aggregate means) | COVID-19<br>(aggregate means) | Cancer (31)<br>(means) | COVID-19<br>(means) |
|----------------------|------------------------------------|----------------------------------|-------------------------------|------------------------|---------------------|
| Social rejection     | 19.95                              | 14.87                            | 14.22                         | 1.42                   | 1.58                |
| Internalized shame   | 13.74                              | 8.45                             | 8.39                          | 1.51                   | 1.68                |
| Social isolation     | 17.85                              | 14.64                            | 10.17                         | 1.71                   | 1.45                |
| Financial insecurity | 8.12                               | 5.73                             | 3.51                          | 1.68                   | 1.17                |
| Total score          | <b>59.66</b>                       | <b>43.69</b>                     | <b>36.29</b>                  | <b>1.59</b>            | <b>1.55</b>         |

369 Table 4: Experienced stigma in people living with cancer, HIV/AIDS or after COVID-19

370

### 371 Experienced stigma and applied coping strategies from the inner to the outer societal 372 level

373 On an individual level, factors such as personality, social resources, and economic situation, can either  
 374 enhance or mitigate the impact of stigma. In our cohort, COVID-19-related stigma did usually not  
 375 culminate in financial hardship, in contrast to other, mainly low-and-middle-income countries  
 376 (13,17,41). Some participants suffered from a loss of income while being ill, but none reported loss of  
 377 livelihood or job insecurity.

378 A sudden illness like COVID-19 resulting in fear of death or infecting others, loneliness, and shame  
 379 generates a feeling of vulnerability, which serves as a breeding ground for experiencing stigma. Vice  
 380 versa, stigma seems to increase vulnerability, both in this and other studies (6,22,42,43). Hence,  
 381 COVID-19-related stigma leads to psychological stress and adds to the burden of disease (13,24,42).  
 382 Loss of autonomy, specifically the violation of privacy, was also observed in other settings (13,41,44).  
 383 Participants reported that rumours of someone being infected travelled quickly and confidentiality was  
 384 often breached, even in healthcare facilities. This poses a serious risk for people to hide their condition  
 385 and refrain from test- or healthcare-seeking, favouring the further spread of the virus (17). In contrast,  
 386 the individual's resilience was a valuable source for coping, reflected either by self-confidence or trust  
 387 in others. In other studies, faith in God strengthened the resilience in COVID-19 survivors (24,45).  
 388 'Coming to terms with the disease' was described as a way of accepting and adapting, which was  
 389 similarly found by Gopichandran *et al.* (2021) using the terms 'understanding disease characteristics,  
 390 risk acceptance and self-isolation' (41) and by Bhandari *et al.* (2021) as 'accepting reality' (45). Sharing  
 391 experiences, often delayed, which is not uncommon after trauma, rationalization to justify former  
 392 behaviour and, in one case, denial were other coping strategies observed, similarly to the  
 393 'rationalisation and sharing problems' Bhandari *et al.* (2021) described (45).

394

395 On an interpersonal or communal level, stigma was often experienced as vilification including blame,  
 396 social rejection, and stereotyping. Similarly, Gopichandran *et al.* (2021) (41) noticed an exclusion from  
 397 essential services such as grocery stores and water taps. Jiang *et al.* (2021) (11) found that 5% of



1  
2  
3 398 respondents lived in communities that rejected people with COVID-19. Imran et al. (2020) (13)  
4 399 reported social rejection of whole families if one member fell ill. Amir (2020) (12) described how  
5 400 patients were treated as outcasts, given bad names and blamed for spreading the disease. Our data  
6 401 suggests that triggers for discriminating of COVID-19 survivors were a general fear of getting infected  
7 402 and noticing presumably irresponsible behaviour of others, often based on misconceptions regarding  
8 403 modes of transmission. Since the virus was perceived as lethal, social rejection seemed reasonable to  
9 404 keep supposedly infectious people at a distance (12,13,17,26,44). In some studies, stigmatizing  
10 405 attitudes were linked to experienced vulnerability, poor education and conflicting information in the  
11 406 media (14,18,23,25), pointing out the necessity of careful communication and precise information  
12 407 about COVID-19 (29). On the other hand, a strong, solidary social network and sound relationships  
13 408 were valuable resources to cope with stigma (24,41,45,46). This might work in both directions: For  
14 409 those not infected, COVID-19 is not reduced to a faceless, dangerous virus, but connected to a human  
15 410 being (47). This can induce a comprehensive and mindful attitude that prevents stigmatization and  
16 411 supports those infected. 'Humanizing' COVID-19 has been insinuated as a way to end stigma, either by  
17 412 involving celebrities or sharing narratives from affected people (16,18,48).

21 413  
22 414 Stigma experienced on an institutional level included both direct and indirect discrimination. The  
23 415 former resulted from inappropriate treatment by professionals, such as negligence of patients or  
24 416 compelling them to leave the hospital. Difficulties in accessing healthcare, poor services and negligence  
25 417 were also found in other settings (19,41,42). Indirect discrimination referred to a lack of accountability  
26 418 when health authorities were presumably too overwhelmed to take over responsibility. These  
27 419 experiences elicited either incomprehension or leniency in participants and show the necessity for  
28 420 institutions to be transparent (26) and give consistent instructions to preserve people's confidence and  
29 421 compliance.

32 422  
33 423 On a societal level, health-related stigma is often associated with certain norms and values. For  
34 424 example, people living with HIV/AIDS are often perceived as 'dirty' or 'immoral' (49) and some types  
35 425 of cancer are linked to an unhealthy lifestyle or risk behaviour (50). In contrast to those conditions,  
36 426 COVID-19 is an airborne infection with high transmissibility, meaning that one person infects about  
37 427 three others (51). We noticed that COVID-19 survivors often felt like a source of infection, i.e. a menace  
38 428 to others and were ashamed and eager to reduce further harm. The findings indicate a change of  
39 429 perspective from passively 'catching the virus'—as is commonly used in other infections—to actively  
40 430 'spreading the virus', even if this happened unwittingly. The change equals an unprecedented shift  
41 431 within social norms from 'victim' to 'perpetrator'. This public attitude is also reflected in editorial  
42 432 cartoons blaming certain groups or behaviour for the transmission of COVID-19 (25), which does not  
43 433 only add to the psychological stress in affected people, but also to a polarization within society. As a  
44 434 coping strategy, participants reacted with social withdrawal, a strictly law-abiding or hygiene  
45 435 advocating behaviour.

49 436  
50 437 The experienced stigma and applied coping strategies within the respective social layer are depicted  
51 438 as comprehensive framework in figure 2. Stigma experienced at the individual level is shown at the  
52 439 bottom of the framework, followed by the interpersonal, communal, institutional, and finally the  
53 440 societal level.

56 441

57 442 *Figure 2: Comprehensive framework of experienced stigma and applied coping strategies, stratified by societal layer*

58 443

## 444 Intersectional stigma

445 As a social phenomenon, stigma can never be assessed detached from other social conditions, often  
446 mirroring power differences between groups. Most studies about COVID-19-related stigma suggest a  
447 higher prevalence among the elderly or patients with comorbidities, since they are most affected by  
448 the disease (26,42,48). However, in our study, young to middle-aged participants reported the highest  
449 level of experienced stigma. This might result from the shift from 'victim' to 'perpetrator' mentioned  
450 earlier. Those participants who were seriously ill often received sympathy from their social  
451 environment and were seen as 'victims'. In contrast, young people were often asymptomatic and  
452 regarded as 'super-spreaders' (52), i.e. drivers of the pandemic. Similarly, a recent study from Israel  
453 found negative age-related stereotypes associated with younger people (54). Reports from illegal  
454 parties despite the curfew added to a reckless and careless stereotype of young people (53). We  
455 assume stereotyping also caused experienced stigma in participants with travel history (55): Those  
456 coming back from a skiing trip in a hotspot were seen as a major source of the pandemic and perceived  
457 as reckless, putting fun above health. Similarly, the patient's **origin** was also connected with stigma in  
458 other settings, e.g. regarding migrant workers in Delhi, India, residing in Haryana (11,17,26,48).  
459 However, since all our participants had the same cultural background, we were not able to assess  
460 different ethnicities in our cohort. In contrast to other studies, we did not find any difference in **gender**  
461 (13,26,42,56,57) or **education** (56–58) regarding experienced stigma. Previous research identified an  
462 association between **poverty** (17,41) or occupational status (56) and experienced stigma, assuming a  
463 mutual influence: COVID-19 is more easily spread in over-crowded, poorer areas; on the other hand,  
464 COVID-19 can lead to a loss of livelihood of those infected. We did not collect data on the economic  
465 situation, but used the occupational status as a proxy, which revealed no significant difference  
466 between the groups. However, this variable might fail to reflect more subtle socioeconomic differences  
467 between participants. Similar to Gopichandran et al. (2021) (41), our qualitative data suggested that  
468 experienced stigma differs with **residential site**: participants in more anonymous urban apartments  
469 experienced less stigma than those living in rural areas, where residents know each other and word by  
470 mouth travels quickly. On the other hand, participants from rural areas also reported more neighbourly  
471 support.

## 472 Reflexivity and possible bias

473 The interviews were conducted by phone, so physical appearance and body language did not influence  
474 the data, in contrast to face-to-face interviews. This can work in both directions: either participants  
475 appreciated the more anonymous atmosphere to share private information, or they would have  
476 preferred a more personal and intimate setting.

477 Talking to a medical doctor (LP), participants are used to sharing physical complaints rather than social  
478 experiences such as stigma. Participants often had the impression that their narratives were  
479 inappropriate or not of interest. Although participants were encouraged to share their stories, an  
480 expectation bias cannot be excluded. Since stigma is a sensitive topic, it is easily subjected to a social-  
481 desirability bias and hence bearing the risk of the respondents' inclination towards euphemized  
482 answers. Furthermore, a recall bias must be considered due to the retrospective character of the study.  
483 Ultimately, those participants who volunteered to be interviewed were mostly of German origin. The  
484 requirement of an advanced level of German might have limited the diversity of study participants and  
485 caused a selection bias, since the sample is unlikely to represent all cultural groups and ethnicities  
486 living in Germany.

487

## 488 Conclusion and implications for stakeholders

489 Around the globe, stigma is a social phenomenon that cuts through all layers of society. It is intertwined  
490 with or aggravated by social factors that can lead to 'othering' and discrimination. It can limit access  
491 to healthcare and other public services and can therefore be seen as a social determinant of health  
492 equity and a hidden burden of disease. Stigma arises from perceived careless behaviour and irrational  
493 fear of infection, which emerge from misconceptions about the disease. Information about COVID-19  
494 in social media is often incorrect (59) or biased (25) and people have difficulties finding reliable sources  
495 (11) to distinguish between fake and fact. In line with previous research (29), we emphasize the need  
496 of providing accurate information and exposing misinformation on disease prevention and treatment  
497 to end COVID-19 related stigma.

498

499

## 500 Acknowledgements

501 We thank Michael Krupka for valuable input and continuous support and Métrey Tiv for reviewing the  
502 interview guide.

503

504

505

## 506 Figure legends

507 Figure 1: A) Social Impact Scale, overall score. B) Dimensions of stigma. High numbers equal high  
508 level of experienced stigma.

509 Figure 2: Comprehensive framework of experienced stigma and applied coping strategies, stratified  
510 by societal layer

511

1  
2  
3  
4 512 **Statements**

5 513

6  
7 514 a. Contributorship

- 8  
9 515 • Conceptualisation: LP, BG  
10 516 • Methodology: LP  
11 517 • Data acquisition: LP  
12 518 • Initial analysis: LP  
13 519 • Interpretation of data: LP, SB, CB, BG  
14 520 • Writing - original draft: LP  
15 521 • Visualization: LP  
16 522 • Writing - review and editing: SB, CB, BG  
17 523 • Final approval: LP, SB, CB, BG  
18 524 • Accountability: LP, SB, CB, BG

19 525

20 526

21 527 b. Funding with award/grant number

22 528 There was no funding involved in this study.

23 529

24 530

25 531 c. Competing interests

26 532 The authors declare that there is no conflict of interest.

27 533

28 534

29 535 d. Data sharing statement

30 536 Data (both quantitative and original German qualitative data) are available on request.

31 537

32 538  
33  
34  
35  
36  
37  
38  
39  
40  
41  
42  
43  
44  
45  
46  
47  
48  
49  
50  
51  
52  
53  
54  
55  
56  
57  
58  
59  
60

## References

1. Goffman E. *Stigma: Notes on the Management of Spoiled Identity*. New York: Simon & Schuster, Inc; 1963.
2. Bos AER, Pryor JB, Reeder GD, Stutterheim SE. *Stigma: Advances in Theory and Research*. *Basic Appl Soc Psych* [Internet]. 2013 Jan 4 [cited 2021 Mar 15];35(1):1–9. Available from: <https://www.tandfonline.com/doi/full/10.1080/01973533.2012.746147>
3. MacLean R. Resources to address stigma related to sexuality, substance use and sexually transmitted and blood-borne infections. *Can Commun Dis Rep* [Internet]. 2018 Feb 1 [cited 2021 Sep 27];44(2):62–7. Available from: <https://pubmed.ncbi.nlm.nih.gov/29770101/>
4. WHO. *Undefined and Hidden Burden of Mental Health Problems* [Internet]. Geneva; 1999. Available from: <https://books.google.de/books?id=As33jwEACAAJ>
5. Hatzenbuehler ML, Phelan JC, Link BG. Stigma as a Fundamental Cause of Population Health Inequalities. *Am J Public Health* [Internet]. 2013 May [cited 2021 Sep 27];103(5):813. Available from: </pmc/articles/PMC3682466/>
6. Campo-Arias A, Pedrozo-Pupo JC, Caballero-Domínguez CC. Relation of perceived discrimination with depression, insomnia and post-traumatic stress in COVID-19 survivors. *Psychiatry Res*. 2022 Jan 1;307.
7. Stangl AL, Earnshaw VA, Logie CH, Van Brakel W, Simbayi LC, Barré I, et al. The Health Stigma and Discrimination Framework: A global, crosscutting framework to inform research, intervention development, and policy on health-related stigmas. *BMC Med* [Internet]. 2019 Feb 15 [cited 2021 Mar 15];17(1). Available from: <https://pubmed.ncbi.nlm.nih.gov/30764826/>
8. UNICEF. *COVID-19 & stigma: How to prevent and address social stigma in your community | UNICEF Sudan* [Internet]. [cited 2021 Sep 27]. Available from: <https://www.unicef.org/sudan/covid-19-stigma-how-prevent-and-address-social-stigma-your-community>
9. Bruns DP, Kraguljac NV, Bruns TR. COVID-19: Facts, Cultural Considerations, and Risk of Stigmatization. *J Transcult Nurs* [Internet]. 2020 Jul 1 [cited 2021 Mar 15];31(4):326–32. Available from: <http://journals.sagepub.com/doi/10.1177/1043659620917724>
10. Li W, Yang Y, Ng CH, Zhang L, Zhang Q, Cheung T, et al. Global imperative to combat stigma associated with the coronavirus disease 2019 pandemic. *Psychol Med* [Internet]. 2021 Aug 1 [cited 2021 Sep 27];51(11):1957–8. Available from: <https://www.cambridge.org/core/journals/psychological-medicine/article/global-imperative-to-combat-stigma-associated-with-the-coronavirus-disease-2019-pandemic/E46F6C71A680D1896B668C5794D98354>
11. Jiang T, Lin L, Zhong Y, Wang X, Zhu H. COVID-19-related stigma and its' influencing factors: a rapid nationwide study in China. 2020 Aug 28 [cited 2021 Sep 27]; Available from: <https://www.researchsquare.com>
12. Amir K. COVID-19 and its related stigma: A qualitative study among survivors in Kampala, Uganda. *Stigma Heal*. 2021;
13. Imran N, Afzal H, Aamer I, Hashmi A, Shabbir B, Asif A, et al. Scarlett letter: A study based on experience of stigma by COVID-19 patients in quarantine. *Pakistan J Med Sci* [Internet]. 2020 [cited 2021 Mar 15];36(7):1471–7. Available from: </pmc/articles/PMC7674879/>
14. Moradi Y, Mollazadeh F, Karimi P, Hosseingholipour K, Baghaei R. Psychological disturbances of survivors throughout COVID-19 crisis: a qualitative study. *BMC Psychiatry*. 2020 Dec 1;20(1).
15. Dye T, Alcantara L, Siddiqi S, Barbosu M, Sharma S, Panko T, et al. Risk of COVID-19-related bullying, harassment and stigma among healthcare workers: an analytical cross-sectional global study. *BMJ Open* [Internet]. 2020 Dec 30 [cited 2021 Sep 27];10(12). Available from: <https://pubmed.ncbi.nlm.nih.gov/33380488/>
16. Chii C, Hospital C, Permaisuri R, Xin B, Lim J, Raja H, et al. Experiences of Social Stigma Among Patients Tested Positive for COVID-19 and Their Family Members: A Qualitative Study. 2021 Feb 8 [cited 2021 Sep 27]; Available from: <https://www.researchsquare.com>
17. Bhanot D, Singh T, Verma S, Sharad S. Stigma and Discrimination During COVID-19 Pandemic. *Front public Heal* [Internet]. 2021 Jan 12 [cited 2021 Sep 27];8. Available from: <https://pubmed.ncbi.nlm.nih.gov/33585379/>
18. Chen Y, Jin J, Zhang X, Zhang Q, Dong W, Chen C. Reducing Objectification Could Tackle Stigma in the COVID-19 Pandemic: Evidence From China. *Front Psychol* [Internet]. 2021 May 28 [cited 2021 Sep 27];12:664422. Available from: </pmc/articles/PMC8193049/>
19. Singh S, Bhutani S, Fatima H. Surviving the stigma: lessons learnt for the prevention of COVID-19 stigma and its mental health impact. *Ment Heal Soc Incl*. 2020 Aug 21;24(3):145–9.
20. Guo M, Kong M, Shi W, Wang M, Yang H. Listening to COVID-19 survivors: what they need after early



- 1  
2  
3 596 discharge from hospital - a qualitative study. <https://doi.org/10.1080/17482631.2022.2030001>  
4 597 [Internet]. 2022 [cited 2022 Mar 2];17(1). Available from:  
5 598 <https://www.tandfonline.com/doi/abs/10.1080/17482631.2022.2030001>  
6 599 21. Toulabi T, Pour FJ, Veiskramian A, Heydari H. Exploring COVID-19 patients' experiences of psychological  
7 600 distress during the disease course: a qualitative study. *BMC Psychiatry*. 2021 Dec 1;21(1).  
8 601 22. Sousa AR de, Cerqueira SSB, Santana T da S, Suto CSS, Almeida ES, Brito LS, et al. Stigma experienced by  
9 602 men diagnosed with COVID-19. *Rev Bras Enferm*. 2021;75Suppl 1(Suppl 1):e20210038.  
10 603 23. Habibid MA, Dayyabid FM, Ilyyasu G, Habib AG. Knowledge, attitude and practice survey of COVID-19  
11 604 pandemic in Northern Nigeria. 2021; Available from: <https://doi.org/10.1371/journal.pone.0245176>  
12 605 24. Adom D, Mensah J, Osei M. The psychological distress and mental health disorders from COVID-19  
13 606 stigmatization in Ghana. *Soc Sci Humanit open* [Internet]. 2021 [cited 2021 Sep 27];4(1):100186.  
14 607 Available from: <https://pubmed.ncbi.nlm.nih.gov/34250461/>  
15 608 25. Labbé F, Pelletier C, Bettinger JA, Curran J, Graham JE, Greyson D, et al. Stigma and blame related to  
16 609 COVID-19 pandemic: A case-study of editorial cartoons in Canada. *Soc Sci Med*. 2022 Mar 1;296.  
17 610 26. Roelen K, Ackley C, Boyce P, Farina N, Ripoll S. COVID-19 in LMICs: The Need to Place Stigma Front and  
18 611 Centre to Its Response. *Eur J Dev Res* [Internet]. 2020 Dec 21 [cited 2021 Mar 15];32(5):1592–612.  
19 612 Available from: <http://link.springer.com/10.1057/s41287-020-00316-6>  
20 613 27. He J, He L, Zhou W, Nie X, He M. Discrimination and social exclusion in the outbreak of COVID-19. *Int J*  
21 614 *Environ Res Public Health*. 2020 Apr 2;17(8).  
22 615 28. Mlouki I, Zammit N, Ghammem | Rim, Sihem |, Fredj B, Bannour R, et al. Validity and reliability of a  
23 616 modified short version of a stigma scale for use among Tunisian COVID-19 patients after quarantine: A  
24 617 cross-sectional study. *Heal Sci Reports* [Internet]. 2022 Mar 1 [cited 2022 Mar 2];5(2):e520. Available  
25 618 from: <https://onlinelibrary.wiley.com/doi/full/10.1002/hsr2.520>  
26 619 29. Ugidos C, López-Gómez A, Castellanos MÁ, Saiz J, González-Sanguino C, Ausín B, et al. Evolution of  
27 620 intersectional perceived discrimination and internalized stigma during COVID-19 lockdown among the  
28 621 general population in Spain. *Int J Soc Psychiatry*. 2022 Feb 1;68(1):55–63.  
29 622 30. Fife BL, Wright ER. The dimensionality of stigma: A comparison of its impact on the self of persons with  
30 623 HIV/AIDS and cancer. Vol. 41, *Journal of Health and Social Behavior*. American Sociological Association;  
31 624 2000. p. 50–67.  
32 625 31. Eichhorn S, Mehnert A, Stephan M. [German Version of the Social Impact Scale (SIS-D)--Pilot Testing of  
33 626 an Instrument for Measuring Experienced Stigmatization in a Sample of Cancer Patients]. *Psychother*  
34 627 *Psychosom Med Psychol* [Internet]. 2015 May 1 [cited 2021 Sep 27];65(5):183–90. Available from:  
35 628 <https://pubmed.ncbi.nlm.nih.gov/25794353/>  
36 629 32. Marshall JC, Murthy S, Diaz J, Adhikari N, Angus DC, Arabi YM, et al. A minimal common outcome  
37 630 measure set for COVID-19 clinical research. *Lancet Infect Dis* [Internet]. 2020 Aug 1 [cited 2022 Mar  
38 631 1];20(8):e192–7. Available from: <http://www.thelancet.com/article/S1473309920304837/fulltext>  
39 632 33. Miles, M.B & Huberman A. An expanded sourcebook: Qualitative data analysis (2nd Edition). 2nd Editio.  
40 633 Miles MB, Huberman AM, editors. Sage Publications. London: SAGE Publications; 1994. p. 56-57.  
41 634 34. Richards L, Morse JM, Richards C. README FIRST for a User's Guide to Qualitative Methods. 2007. p.  
42 635 135-138.  
43 636 35. Grbich C. Qualitative data analysis : an introduction. SAGE Publications; 2007. p. 21-22.  
44 637 36. Dey I. Grounding grounded theory : guidelines for qualitative inquiry. Academic Press; 1999. 95 p.  
45 638 37. Rossman GB, Rallis SF. An Introduction to Qualitative Research: Learning in the Field. *An Introd to Qual*  
46 639 *Res Learn F*. 2020 Jan 20;  
47 640 38. Charmaz K. Constructing Grounded Theory: A Practical Guide through Qualitative Analysis. SAGE  
48 641 Publications; 2006. (Introducing Qualitative Methods series).  
49 642 39. Graneheim UH, Lundman B. Qualitative content analysis in nursing research: concepts, procedures and  
50 643 measures to achieve trustworthiness. *Nurse Educ Today* [Internet]. 2004 [cited 2022 Mar 3];24(2):105–  
51 644 12. Available from: <https://pubmed.ncbi.nlm.nih.gov/14769454/>  
52 645 40. Mahajan AP, Sayles JN, Patel VA, Remien RH, Sawires SR, Ortiz DJ, et al. Stigma in the HIV/AIDS  
53 646 epidemic: A review of the literature and recommendations for the way forward. *AIDS* [Internet]. 2008  
54 647 [cited 2022 Mar 3];22(Suppl 2):S67. Available from: [/pmc/articles/PMC2835402/](https://pubmed.ncbi.nlm.nih.gov/14769454/)  
55 648 41. Gopichandran V, Subramaniam S. A qualitative inquiry into stigma among patients with Covid-19 in  
56 649 Chennai, India. *Indian J Med Ethics* [Internet]. 2021 Jul 1 [cited 2021 Sep 27];VI(3):1–21. Available from:  
57 650 <https://pubmed.ncbi.nlm.nih.gov/34287199/>  
58 651 42. Li J, Liang W, Yuan B, Zeng G. Internalized Stigmatization, Social Support, and Individual Mental Health  
59 652 Problems in the Public Health Crisis. *Int J Environ Res Public Health* [Internet]. 2020 [cited 2021 Sep  
60 653 27];17(12):1–14. Available from: [/pmc/articles/PMC7345765/](https://pubmed.ncbi.nlm.nih.gov/34287199/)

1  
2  
3  
4  
5  
6  
7  
8  
9  
10  
11  
12  
13  
14  
15  
16  
17  
18  
19  
20  
21  
22  
23  
24  
25  
26  
27  
28  
29  
30  
31  
32  
33  
34  
35  
36  
37  
38  
39  
40  
41  
42  
43  
44  
45  
46  
47  
48  
49  
50  
51  
52  
53  
54  
55  
56  
57  
58  
59  
60

- 654 43. Sahoo S, Mehra A, Suri V, Malhotra P, Yaddanapudi LN, Dutt Puri G, et al. Lived experiences of the  
655 corona survivors (patients admitted in COVID wards): A narrative real-life documented summaries of  
656 internalized guilt, shame, stigma, anger. *Asian J Psychiatr*. 2020 Oct 1;53:102187.
- 657 44. Son H-M, Choi W-H, Hwang Y-H, Yang H-R. The Lived Experiences of COVID-19 Patients in South Korea:  
658 A Qualitative Study. *Int J Environ Res Public Health* [Internet]. 2021;18(14). Available from:  
659 <https://www.mdpi.com/1660-4601/18/14/7419>
- 660 45. Bhandari S, Khakha D, Ajesh Kumar T, Verma R. "I might catch this infection again and this time i will  
661 not survive" - A qualitative study on lived-in experiences and coping strategies of COVID-19-positive  
662 individuals in India. *Indian J Psychiatry* [Internet]. 2021 Nov 1 [cited 2022 Mar 2];63(6):560–7. Available  
663 from:  
664 [https://journals.lww.com/indianjpsychiatry/Fulltext/2021/63060/\\_I\\_might\\_catch\\_this\\_infection\\_again  
665 \\_and\\_this\\_time.8.aspx](https://journals.lww.com/indianjpsychiatry/Fulltext/2021/63060/_I_might_catch_this_infection_again_and_this_time.8.aspx)
- 666 46. Heijnders M, Van Der Meij S. The fight against stigma: an overview of stigma-reduction strategies and  
667 interventions. *Psychol Health Med* [Internet]. 2006 [cited 2021 Sep 27];11(3):353–63. Available from:  
668 <https://pubmed.ncbi.nlm.nih.gov/17130071/>
- 669 47. Logie CH. Lessons learned from HIV can inform our approach to COVID-19 stigma. *J Int AIDS Soc*  
670 [Internet]. 2020 May 1 [cited 2021 Sep 27];23(5):e25504. Available from:  
671 <https://onlinelibrary.wiley.com/doi/full/10.1002/jia2.25504>
- 672 48. Asadi-Aliabadi M, Tehrani-Banihashemi A, Moradi-Lakeh M. Stigma in COVID-19: A barrier to seek  
673 medical care and family support. *Med J Islam Repub Iran* [Internet]. 2020 Oct 30 [cited 2021 Sep 27];34.  
674 Available from: <https://pubmed.ncbi.nlm.nih.gov/33315991/>
- 675 49. Logie CH, James LI, Tharao W, Loutfy MR. HIV, gender, race, sexual orientation, and sex work: A  
676 qualitative study of intersectional stigma experienced by HIV-positive women in Ontario, Canada. *PLoS*  
677 *Med*. 2011 Nov;8(11).
- 678 50. Chapple A, Ziebland S, McPherson A. Stigma, shame, and blame experienced by patients with lung  
679 cancer: qualitative study. *BMJ* [Internet]. 2004 Jun 19 [cited 2021 Oct 19];328(7454):1470–3. Available  
680 from: <https://pubmed.ncbi.nlm.nih.gov/15194599/>
- 681 51. D'Arienzo M, Coniglio A. Assessment of the SARS-CoV-2 basic reproduction number, R0, based on the  
682 early phase of COVID-19 outbreak in Italy. *Biosaf Heal* [Internet]. 2020 Jun 1 [cited 2021 Oct  
683 19];2(2):57. Available from: [/pmc/articles/PMC7148916/](https://pubmed.ncbi.nlm.nih.gov/35120667/)
- 684 52. Lewis D. Superspreading drives the COVID pandemic - and could help to tame it. *Nature*. 2021 Feb  
685 1;590(7847):544–6.
- 686 53. Germany: Hamburg police clear neighborhood after thousands show up to party | News | DW |  
687 30.05.2021 [Internet]. [cited 2021 Sep 27]. Available from: [https://www.dw.com/en/germany-  
688 hamburg-police-clear-neighborhood-after-thousands-show-up-to-party/a-57717566](https://www.dw.com/en/germany-hamburg-police-clear-neighborhood-after-thousands-show-up-to-party/a-57717566)
- 689 54. Werner P, AboJabel H, Tur-Sinai A. Ageism towards older and younger people in the wake of the  
690 COVID-19 outbreak. *Maturitas* [Internet]. 2022 Mar 1 [cited 2022 Mar 3];157:1–6. Available from:  
691 <https://pubmed.ncbi.nlm.nih.gov/35120667/>
- 692 55. 'Everyone was drenched in the virus': was this Austrian ski resort a Covid-19 ground zero? |  
693 Coronavirus | The Guardian [Internet]. [cited 2021 Sep 27]. Available from:  
694 [https://www.theguardian.com/world/2020/sep/05/everyone-was-drenched-in-the-virus-was-this-  
695 austrian-ski-resort-a-covid-19-ground-zero](https://www.theguardian.com/world/2020/sep/05/everyone-was-drenched-in-the-virus-was-this-austrian-ski-resort-a-covid-19-ground-zero)
- 696 56. Yuan Y, Zhao YJ, Zhang QE, Zhang L et al. COVID-19-related stigma and its sociodemographic correlates:  
697 a comparative study. *Global Health* [Internet]. 2021 Dec 1 [cited 2021 Sep 27];17(1). Available from:  
698 <https://pubmed.ncbi.nlm.nih.gov/33962651/>
- 699 57. Dar SA, Khurshid SQ, Wani ZA, Khanam A, Haq I, Shah NN, et al. Stigma in coronavirus disease-19  
700 survivors in Kashmir, India: A cross-sectional exploratory study. *PLoS One*. 2020 Nov 1;15(11  
701 November).
- 702 58. Almoayad F, Mahboub S, Amer L Bin, Alrabiah A, Alhashem A. Stigmatisation of covid-19 in Riyadh,  
703 Saudi Arabia a cross-sectional study. *Sultan Qaboos Univ Med J*. 2021 Nov 25;21(4):525–31.
- 704 59. Li H, Bailey A, Huynh D, Chan J. YouTube as a source of information on COVID-19: a pandemic of  
705 misinformation? *BMJ Glob Heal* [Internet]. 2020 May 14 [cited 2021 Sep 27];5(5). Available from:  
706 <https://pubmed.ncbi.nlm.nih.gov/32409327/>

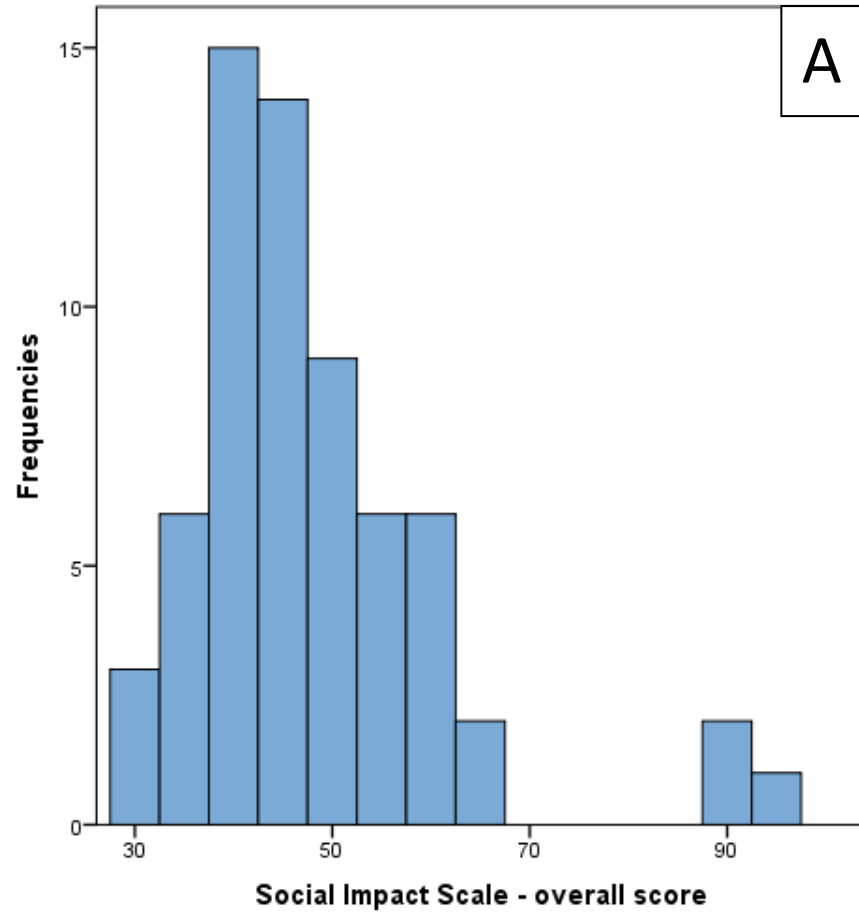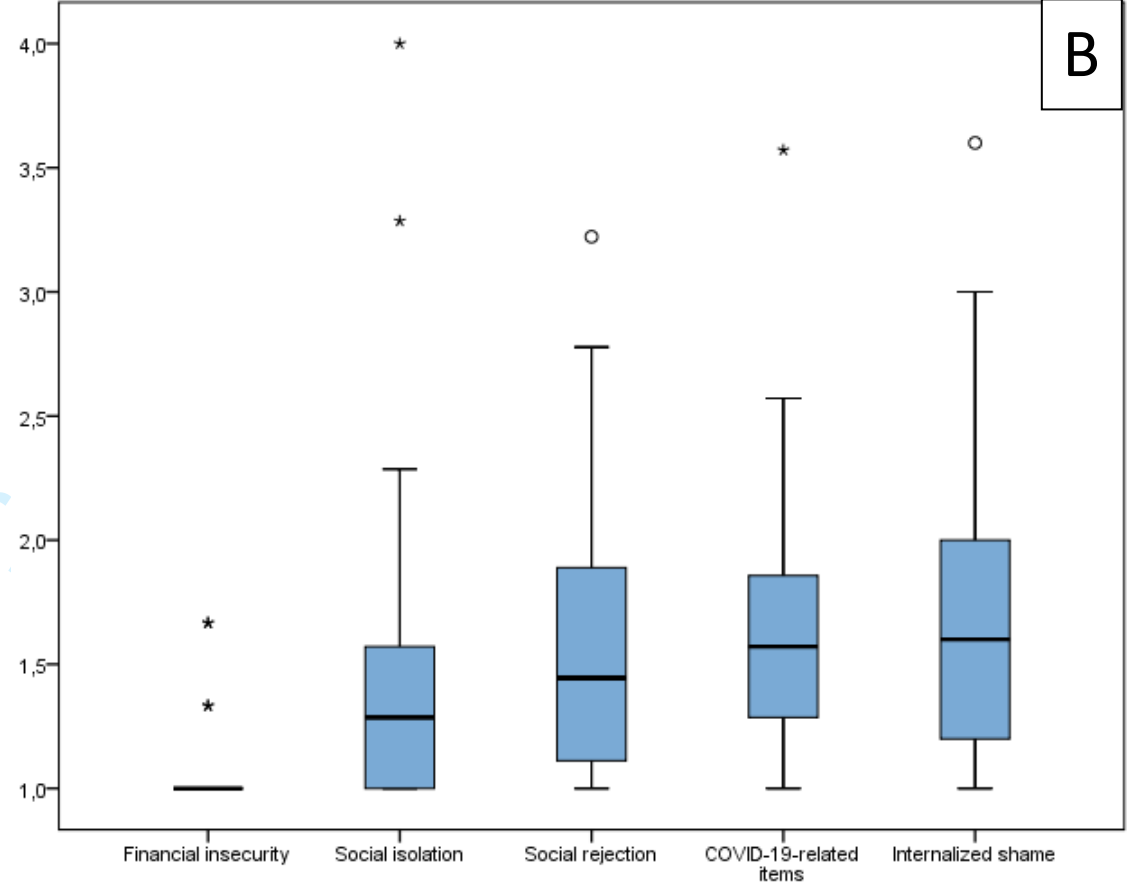



## Experienced stigma

## Applied coping strategies

1  
2  
3  
4  
5  
6  
7  
8  
9  
10  
11  
12  
13  
14  
15  
16  
17  
18  
19  
20  
21  
22  
23  
24  
25  
26  
27  
28  
29  
30  
31  
32  
33  
34  
35  
36  
37  
38  
39  
40  
41



## Supplementary material

S1) COVID-19-related questions added to the Social Impact Scale

S2) Interview guide

S3) Table with quotes for experienced stigma

S4) Table with quotes for applied coping strategies

## S1) Additional COVID-19-related questions (additional to the Social Impact Scale)

1. Ich hatte die Befürchtung, dass andere aufgrund meiner längeren Abwesenheit meine Erkrankung erahnen konnten.  
1. I was worried that others might suspect my illness due to my long absence.
2. Ich habe mich schuldig gefühlt, dass ich (eventuell) andere angesteckt habe, auch wenn dies unwissentlich geschah.  
2. I feel guilty because I accidentally might have infected others.
3. Als ich auf meine krankheitsbedingte Abwesenheit angesprochen wurde, habe ich offen gesagt, dass ich an COVID19 erkrankt war.  
3. When I was asked about my absence, I admitted that I had COVID-19.
4. Als ich nach meiner Erkrankung zurück in die Arbeit kam oder mich mit Freunden getroffen habe, hatte ich Sorge, wie meine Kollegen/Freunde wohl auf mich reagieren würden.  
4. When I met colleagues or friends after being ill, I was worried how they would react towards me.
5. Wenn jemand mit mir über meine Erkrankung spricht, ist mir das unangenehm.  
5. It makes me feel uncomfortable if someone alludes to my illness
6. Ich wünschte, es hätten weniger Leute von meiner Erkrankung erfahren.  
6. I wish less people had known about my illness.
7. Ich habe das Gefühl, durch Institutionen (z.B. Gesundheitsamt, Arztpraxis, Rettungsdienst etc.) ungerecht oder nachteilig behandelt worden zu sein.  
7. I feel that I have been treated unfairly or adversely by institutions (health authority, family doctor, paramedics)

## S2) Interview guide

Alter / Geschlecht/ höchster Bildungsabschluss/ Schwere der COVID-19-Erkrankung  
Age/ Gender/ highest level of education/ severity of COVID-19

1. Was ging Ihnen durch den Kopf, als Sie erfuhren, dass der Test positiv ausgefallen war?
  1. What was going through your mind when you received the positive COVID-19 test result?
2. Wie hat sich ihr Leben verändert, seitdem Sie an COVID19 erkrankt waren?
  2. Did your life change since you had COVID-19? If yes, how did change?
3. Haben Sie jetzt noch gesundheitliche Beschwerden, auch wenn die Erkrankung als ausgeheilt gilt?
  3. Do you still have any symptoms, even if the infection is cured?
4. Wie haben Sie die Zeit in Quarantäne erlebt?
  4. How did you experience the time in quarantine?
    - a. Wie sah ein typischer Alltag in der Isolation aus?
      - a. How did your everyday routine in quarantine look like?
    - b. Was war besonders schwierig in dieser Zeit?
      - b. What was particularly difficult during that time?
5. Mit wem konnten Sie offen über Ihre Erkrankung sprechen?
  5. Who could you talk to about your condition?
6. Gab es Situationen, in denen Sie gezögert haben, offen über Ihre Erkrankung zu sprechen?
  6. Have you experienced a situation where you hesitated to talk freely about your infection?
7. Wie fielen die Reaktionen der Mitmenschen auf die Erkrankung aus?
  7. How did people react to your infection?
8. Haben Sie das Gefühl, dass andere Sie anders behandeln, als vor Ihrer Erkrankung?
  8. Do you have the feeling, that others treat you differently since you had COVID-19?
    - a. Inwiefern?
      - a. How so?

- 1  
2  
3           b. Beispiel?  
4  
5           b. Example?  
6  
7  
8           c. Wie sind sie damit umgegangen?  
9  
10          c. How did you cope with/ handle the situation?  
11  
12  
13 9. Gab es Reaktionen von Mitmenschen als diese von Ihrer Erkrankung gehört haben, die Sie  
14 überrascht haben? (positiv und negativ), und wenn ja, inwiefern?  
15  
16 9. Did you experience reactions of others when they heard about you having COVID-19 which  
17 surprised you, either in a good or in a bad way?  
18  
19  
20 10. Das Gesundheitsamt muss alle Kontaktpersonen informieren bzw. Sie mussten die  
21 Kontaktpersonen angeben – wie war das für Sie?  
22  
23 10. The health authority was obliged to inform every person you had been in contact with when  
24 you were diagnosed with COVID-19 – how did you feel about that?  
25  
26  
27  
28 11. Wie war das in der Arbeit, wie reagierten Kollegen auf Sie, als Sie zurückkamen?  
29  
30 11. At work, how did colleagues react when you came back?  
31  
32  
33 12. Es besteht immer das Risiko, unbewusst andere Personen anzustecken. Wie ging es Ihnen  
34 damit und wie sind Sie damit umgegangen?  
35  
36 12. There is always a risk to infect others, unknowingly. How did you feel about this and how did  
37 you cope with it?  
38  
39  
40  
41 13. Im Nachhinein ist man immer schlauer. Denken Sie manchmal, dass Sie hätten verhindern  
42 können, dass Sie sich angesteckt haben?  
43  
44 13. In hindsight, do you think you could have prevented catching COVID-19?  
45  
46  
47  
48 14. Angenommen ein guter Freund von Ihnen würde jetzt an COVID19 erkranken – wie würden  
49 Sie sich verhalten? (Vignette)  
50  
51 14. Assuming a close friend of yours would catch COVID-19, how would you react? (vignette)  
52  
53  
54 15. Hatten Sie aufgrund der Erkrankung finanzielle Sorgen?  
55  
56 15. Did you have financial problems because of having had COVID-19?  
57  
58  
59  
60

## S3) Experienced stigma by societal level

| Theme                       | Type of stigma                                | Code (n*)                           | Quotes                                                                                                                                                                                                                                                                                                                                                                                                                                                                                                                                                                                                                                                                                                                                                                                                                                                                                            |
|-----------------------------|-----------------------------------------------|-------------------------------------|---------------------------------------------------------------------------------------------------------------------------------------------------------------------------------------------------------------------------------------------------------------------------------------------------------------------------------------------------------------------------------------------------------------------------------------------------------------------------------------------------------------------------------------------------------------------------------------------------------------------------------------------------------------------------------------------------------------------------------------------------------------------------------------------------------------------------------------------------------------------------------------------------|
| <b>Individual level</b>     |                                               |                                     |                                                                                                                                                                                                                                                                                                                                                                                                                                                                                                                                                                                                                                                                                                                                                                                                                                                                                                   |
| <b>Vulnerability</b>        | -                                             | Fear, worries and despair (n = 11)  | <p>'I was thinking «why me?»... and «I hope this ends well...»' (female, 50-59 y/o)</p> <p>'I was thinking about death, about becoming even sicker and needing assisted ventilation... This was in the back of my head all the time. I really hope I don't catch it [SARS-CoV-2] again....' (female, 70-79 y/o)</p> <p>'It got worse and worse, I couldn't talk, I couldn't breathe.... I was on my own and...[stops speaking and starts to cry]' (female, 70-79 y/o)</p> <p>'When I woke up again, I knew I would survive.... but still, I was having these panic attacks' (male, 60-69 y/o)</p> <p>'I was afraid I could die. I saw it happen to other patients. It was frightening. The whole situation was frightening.' (male, 40-49 y/o)</p> <p>'You have this feeling that there is nothing to look forward to....' (male, 30-39 y/o)</p>                                                  |
|                             | <i>Internalised stigma / Perceived stigma</i> | Shame, guilt or remorse (n = 14)    | <p>'Of course you feel bad knowing you infected others' (female, 20-29 y/o)</p> <p>'I talked to the people who went into quarantine because of me to make sure they are okay' (male, 60-69 y/o)</p> <p>'I took the wrong decision to go there [place where he was infected]. I had this gut feeling that there is something wrong, that I shouldn't go there. But my friends told me to come with them.... I should have listened to my gut feeling.' (male, 50-59 y/o)</p> <p>'I really don't want to talk about it' (male, 50-59 y/o, sounding distressed), as response to the question, if he accidentally infected others.</p>                                                                                                                                                                                                                                                                |
|                             |                                               | Loneliness and abandonment (n = 14) | <p>'We all felt left alone. We didn't have any kind of support, neither by a doctor nor the public health authority. No one contacted us for days in a row and we started feeling afraid if all of that [referring to the COVID-19 symptoms] were still normal. Somehow, we felt left alone.' (female, 50-59 y/o)</p> <p>'People didn't want to have contact with me. This was especially hard for me, since I had been abroad before for two months, this really got to me.' (female, 20-29 y/o)</p> <p>'You feel that your social network isn't there, the ones you need most aren't with you.' (female 50-59 y/o)</p> <p>'Being on my own was the hardest part.' (male, 60-69 y/o)</p> <p>'You feel lonely. There was no one to talk to.' (female, 70-79 y/o)</p> <p>'You learn very quickly who stands by your side in these difficult times and who lets you down...'' (male, 50-59 y/o)</p> |
| <b>Financial insecurity</b> | -                                             | Direct costs (n = 2)                | <p>'That [not having COVID-19] would have saved me a great deal. Luckily, my health insurance covered most of the expenditures, but since my deductible is rather high, this disease caused a great financial loss for me.' (male, 50-59 y/o)</p> <p>'If I hadn't had any savings, it would have been problematic....' (male, 40-49 y/o)</p>                                                                                                                                                                                                                                                                                                                                                                                                                                                                                                                                                      |

|                                      |                                            |                                         |                                                                                                                                                                                                                                                                                                                                                                                                                                                                                                                                                                                                                                                                                                             |
|--------------------------------------|--------------------------------------------|-----------------------------------------|-------------------------------------------------------------------------------------------------------------------------------------------------------------------------------------------------------------------------------------------------------------------------------------------------------------------------------------------------------------------------------------------------------------------------------------------------------------------------------------------------------------------------------------------------------------------------------------------------------------------------------------------------------------------------------------------------------------|
|                                      |                                            | Loss of income / indirect costs (n = 1) | 'I have to earn my money with physical labour. When I can't work, I don't earn money...' (male, 50-59 y/o)                                                                                                                                                                                                                                                                                                                                                                                                                                                                                                                                                                                                  |
| <b>Interpersonal level</b>           |                                            |                                         |                                                                                                                                                                                                                                                                                                                                                                                                                                                                                                                                                                                                                                                                                                             |
| <b>Loss of autonomy</b>              | <i>Perceived stigma / (Enacted stigma)</i> | Loss of independence (n = 5)            | 'As we were all in quarantine, we relied on others to supply us with food' (female, 50-59 y/o)<br>'We were all isolated, other people had to take care of us.' (female, 20-29 y/o)                                                                                                                                                                                                                                                                                                                                                                                                                                                                                                                          |
|                                      |                                            | Violation of privacy (n = 4)            | 'When I was gone and they knew about it [COVID-19], they turned my whole workplace upside down' (male, 50-59 y/o)<br>'I live in a small village and within two hours, everyone knew about it [COVID-19]' (female, 20-29 y/o)                                                                                                                                                                                                                                                                                                                                                                                                                                                                                |
| <b>Vilification</b>                  |                                            | Blame (n = 9)                           | 'Some people said it is my own fault that I got infected.' (male, 50-59 y/o)<br>'They didn't talk bad in front of me.... but behind my back, I could sense that they thought it's my own fault' (male, 50-59 y/o)<br>'They [family members] were very angry with us that we didn't tell them about our infection. But we didn't know ourselves at that time and didn't have any symptoms! How should we know that we were ill?' (female, 50-59 y/o)<br>'She [a niece] was at our place before [we knew we had COVID-19] and it took a long time until she was able to get a test. She is still holding a grudge until today....' (female, 50-59 y/o)                                                        |
|                                      |                                            | Disregard (n = 4)                       | 'People didn't understand what I was going through. They said «it's like a flu», but for me, it didn't feel just like a flu. No one said «this sounds really bad»' (female, 50-59 y/o)<br>'They [acquaintances] did not really care about what had happened to me.' (female, 20-29 y/o)<br>'My sister said, as long as you don't need invasive ventilation, it's not that bad. But for me, just needing oxygen was already more than enough....' (female, 50-59 y/o)                                                                                                                                                                                                                                        |
| <b>Avoidance of personal contact</b> | <i>Enacted stigma</i>                      | (Irrational) fear of infection (n = 27) | 'In the beginning it felt like people were really scared of me.' (female, 20-29 y/o)<br>'Meeting people in person [in contrast to talking in the phone] was different. People become.... very careful' (male, 30-39 y/o).<br>'My aunt living next door kept her distance for weeks after my quarantine had ended, as if I were still contagious.' (female, 20-29 y/o)<br>'I noticed some people take a step back when I told them [about the COVID-19-infection]' (male, 50-59 y/o)<br>'Everyone you tell that you had COVID flinches and takes a step back' (male, 50-59 y/o)<br>'Many people withdrew from me for a long time.... I think they were still afraid of getting infected' (female, 70-79 y/o) |
|                                      |                                            | Other reasons (n = 2)                   | 'She distanced herself from me. I don't know why, she doesn't even believe in COVID.' (female, 50-59 y/o)                                                                                                                                                                                                                                                                                                                                                                                                                                                                                                                                                                                                   |
| <b>Community level</b>               |                                            |                                         |                                                                                                                                                                                                                                                                                                                                                                                                                                                                                                                                                                                                                                                                                                             |
| <b>Social rejection</b>              | <i>Enacted stigma</i>                      | (Irrational) fear of infection (n = 6)  | 'When I did my groceries and kept a 2 to 3 meters distance, people still told me to go further away.... they even changed the side of the street when they saw me.' (female, 20-29 y/o)<br>'When I went back to the office, some colleagues told me straight to the face they didn't like having me there. We are working in shifts and they would change shifts so they didn't have to work with me.' (male, 30-39 y/o)                                                                                                                                                                                                                                                                                    |



|                                |                                      |                                                |                                                                                                                                                                                                                                                                                                                                                                                                                                                                                                                                                                                                                                                                                                                                                                                                                                                                                                                                                                                                                                                                                                                                                                                                                                                                                                                                                                                                                                                                                                                                                                                                                                                                                                                                                                                                                                                                                                         |
|--------------------------------|--------------------------------------|------------------------------------------------|---------------------------------------------------------------------------------------------------------------------------------------------------------------------------------------------------------------------------------------------------------------------------------------------------------------------------------------------------------------------------------------------------------------------------------------------------------------------------------------------------------------------------------------------------------------------------------------------------------------------------------------------------------------------------------------------------------------------------------------------------------------------------------------------------------------------------------------------------------------------------------------------------------------------------------------------------------------------------------------------------------------------------------------------------------------------------------------------------------------------------------------------------------------------------------------------------------------------------------------------------------------------------------------------------------------------------------------------------------------------------------------------------------------------------------------------------------------------------------------------------------------------------------------------------------------------------------------------------------------------------------------------------------------------------------------------------------------------------------------------------------------------------------------------------------------------------------------------------------------------------------------------------------|
|                                |                                      |                                                | 'When I went to the hairdresser, I told them I really needed a haircut since I had had COVID 3 months ago. First, they refused to cut my hair, they were afraid of getting infected.' (male, 40-49 y/o)                                                                                                                                                                                                                                                                                                                                                                                                                                                                                                                                                                                                                                                                                                                                                                                                                                                                                                                                                                                                                                                                                                                                                                                                                                                                                                                                                                                                                                                                                                                                                                                                                                                                                                 |
| <b>Stereotyping</b>            | <i>Perceived stigma</i>              | Perceived recklessness or carelessness (n = 4) | 'Now you [meaning the interviewer] are probably going to say «how on earth could you go skiing, and how could you go there [place where she got infected]?!?', but back then it wasn't that obvious...'. (female, 20-29 y/o)<br>'People asked, why did go there, when it was a hotspot.' (male, 50-59 y/o)<br>'If a friend of mine had COVID, I would support him and say it's not his fault that he got it. We didn't choose for this either. I'd say it's okay. I wouldn't treat him any different and just act normal' (female, 50-59 y/o)                                                                                                                                                                                                                                                                                                                                                                                                                                                                                                                                                                                                                                                                                                                                                                                                                                                                                                                                                                                                                                                                                                                                                                                                                                                                                                                                                           |
|                                |                                      | Rumours (n = 2)                                | 'In town, everyone acted like they knew better why I was infected' (female, 20-29 y/o)                                                                                                                                                                                                                                                                                                                                                                                                                                                                                                                                                                                                                                                                                                                                                                                                                                                                                                                                                                                                                                                                                                                                                                                                                                                                                                                                                                                                                                                                                                                                                                                                                                                                                                                                                                                                                  |
| <b>Institutional level</b>     |                                      |                                                |                                                                                                                                                                                                                                                                                                                                                                                                                                                                                                                                                                                                                                                                                                                                                                                                                                                                                                                                                                                                                                                                                                                                                                                                                                                                                                                                                                                                                                                                                                                                                                                                                                                                                                                                                                                                                                                                                                         |
| <b>Indirect discrimination</b> | <i>Structural and enacted stigma</i> | Lack of accountability (n = 10)                | 'They [health authorities] gave us a number where we could call, but no one ever answered the phone.' (female, 20-29 y/o)<br>'When I should be discharged from the hospital, and I was still contagious, they [the hospital staff] told me there was no transport to get me home, of course I wasn't allowed to use the public transport and a family member should pick me up. But they were all in quarantine. I tried to contact the public health authority all day long to get a permission for my mother to pick me up, that was very distressing for me. Then they [the hospital staff] came all of the sudden and said I had to go now.' (female, 20-29 y/o).<br>'After we knew we had been in a hotspot, we tried to get a test. When finally someone answered the phone, they told us we couldn't get a test since the place wasn't officially declared a hotspot yet.' (female, 20-29 y/o)<br>'Even when I felt bad, it was impossible to find a doctor to talk to... so in the end I called 112 [national emergency number]' (female, 50-59 y/o)<br>'The worst thing was to get to the hospital in the first place.... So I dialled that number, but ended up in an endless waiting loop. In the other clinic it was exactly the same. I called my general practitioner; he wrote me a sick note for a week. But I didn't need that, I told him I need help... but all he did was writing a second sick note for another week.... Either you are rejected right away or you end up in an endless waiting loop on the phone.' (male, 50-59 y/o)<br>'When I came back home [from a hotspot] my friend who was with me tested positive. The health authority didn't contact me for days. Then I called them, and they said they were not responsible, another authority is responsible for my case. So I called them, but they said, the first authority was responsible....' (male 50-59 y/o) |
|                                |                                      | Inconsistency (n = 4)                          | 'First, they [public health authority] sent us to a testing centre because we had been to an endemic area. But later they were upset that we went there, since we were supposed to stay at home in quarantine....' (female, 20-29 y/o)<br>'First they told me I have to stay in quarantine for another 2 weeks after I was discharged from the hospital. On the last day of my quarantine, my son got a letter that he needs to stay in quarantine for another 2 weeks, in case he got infected on my last day in quarantine. But my wife and daughter didn't have to stay in quarantine any longer, but we were all members of the same household. That didn't make any sense.' (male, 50-59 y/o)<br>'They [the health authority] told me on the phone my quarantine ended on Thursday. Then I got the letter from them saying I needed to stay in quarantine for another 2 weeks' (male, 50-59 y/o)                                                                                                                                                                                                                                                                                                                                                                                                                                                                                                                                                                                                                                                                                                                                                                                                                                                                                                                                                                                                   |

1  
2  
3  
4  
5  
6  
7  
8  
9  
10  
11  
12  
13  
14  
15  
16  
17  
18  
19  
20  
21  
22  
23  
24  
25  
26  
27  
28  
29  
30  
31  
32  
33  
34  
35  
36  
37  
38  
39  
40  
41  
42  
43  
44  
45  
46

|                                         |                                                            |                                                    |                                                                                                                                                                                                                                                                                                                                                                                                                                                                                                                                                                                                                                                                                                                                                                                                                                                                                                                                                                                                                                                                                                            |
|-----------------------------------------|------------------------------------------------------------|----------------------------------------------------|------------------------------------------------------------------------------------------------------------------------------------------------------------------------------------------------------------------------------------------------------------------------------------------------------------------------------------------------------------------------------------------------------------------------------------------------------------------------------------------------------------------------------------------------------------------------------------------------------------------------------------------------------------------------------------------------------------------------------------------------------------------------------------------------------------------------------------------------------------------------------------------------------------------------------------------------------------------------------------------------------------------------------------------------------------------------------------------------------------|
| <p><b>Direct discrimination</b></p>     |                                                            | <p>Unprofessional treatment (n = 4)</p>            | <p>‘Since I was the second patient in that other hospital, they had a lot of «respect» of me and avoided coming close to me... that was even worse for me than the [rejecting] behaviour of other people.’ (female, 20-29 y/o)<br/>                 ‘After I was discharged from the hospital, I wanted to go to the general practitioner for a prescription but they told me I wasn’t allowed there, even though I wasn’t in quarantine anymore. Then 12 weeks later, I needed a letter of transferral, but even then, my sister had to get it for me...’ (male, 60-69 y/o)<br/>                 ‘When he [a friend] stayed at home because one of our group tested positive, his boss counted that as vacation, because the health authority hadn’t called yet.’ (male 50-59 y/o)<br/>                 ‘I was feeling so bad, but in that other hospital they [staff] told me to leave immediately, they threw me out.... so I was crying in front of the hospital until my daughter came to get me. A few days later, I collapsed, and I was brought in here and needed oxygen’ (female, 70-79 y/o)</p> |
| <p><b>Societal level</b></p>            |                                                            |                                                    |                                                                                                                                                                                                                                                                                                                                                                                                                                                                                                                                                                                                                                                                                                                                                                                                                                                                                                                                                                                                                                                                                                            |
| <p><b>Societal norms and values</b></p> | <p><i>Perceived and internalized values and stigma</i></p> | <p>COVID-19 as non-desirable condition (n = 5)</p> | <p>‘When I got the positive test, I was utterly shocked’ (female, 20-29 y/o)<br/>                 ‘I was surprised. I never thought we would get it.’ (female, 50-59 y/o)<br/>                 ‘I was just feeling ill and coughing. Maybe it wasn’t COVID after all. They [the doctors] said the CT-scan confirmed it, but my test was negative.’ (male, 50-59 y/o, denying he had COVID-19)</p>                                                                                                                                                                                                                                                                                                                                                                                                                                                                                                                                                                                                                                                                                                          |
|                                         |                                                            | <p>Perceived menace to others (n = 10)</p>         | <p>‘I didn’t want to bother people. Maybe they would have thought I am still contagious.’ (female, 70-79 y/o)**<br/>                 ‘None of my family members got ill, I didn’t infect anyone.’ (male, 30-39 y/o)**<br/>                 ‘We all paid a lot of attention. We didn’t infect others.’ (male 50-59 y/o)**<br/>                 Q: ‘Do you happen to know if you accidentally infected somebody?’ A: ‘I don’t want to talk about that.’ (male, 50-59 y/o)</p>                                                                                                                                                                                                                                                                                                                                                                                                                                                                                                                                                                                                                                |

\* n = the number how many times this code was applied throughout the interviews

\*\* The assurance of not having infected others reflects the perceived stigma as menace to others and the public health on one hand and efforts to contain the disease as coping with this perception on the other hand.

## S4) Applied coping strategies by societal level

| Theme                                  | Code (n*)                  | Quotes                                                                                                                                                                                                                                                                                                                                                                                                                                                                       |
|----------------------------------------|----------------------------|------------------------------------------------------------------------------------------------------------------------------------------------------------------------------------------------------------------------------------------------------------------------------------------------------------------------------------------------------------------------------------------------------------------------------------------------------------------------------|
| <b>Individual level</b>                |                            |                                                                                                                                                                                                                                                                                                                                                                                                                                                                              |
| <b>Resilience</b>                      | Confidence (n = 5)         | 'I knew I was getting medication; I was sure that would help, otherwise they wouldn't give them to me. I wasn't worried I would die.' (male, 60-69 y/o)<br>'I felt in good hands.' (male, 50-59 y/o)<br>'None of us felt that sick that we needed to go to the hospital.' (female, 50-59 y/o)                                                                                                                                                                                |
|                                        | Self-efficacy (n = 2)      | 'In the beginning it was very hard for me. But as soon as I managed to structure my day, time just flew by.' (male, 30-39 y/o)                                                                                                                                                                                                                                                                                                                                               |
| <b>Coming to terms</b>                 | Pragmatism (n = 2)         | 'I had it [COVID-19], that's all there is. Now I am cured and immune.' (female, 70-79 y/o)                                                                                                                                                                                                                                                                                                                                                                                   |
|                                        | Delayed disclosure (n = 3) | 'Back then, I told them [friends and family] I had it [COVID-19]. But I didn't tell them any details. Now I would, but back then, I just didn't want to.' (male, 40-49 y/o)<br>'In the beginning, I didn't want to share with anyone. Afterwards, we talked about it.' (female, 70-79 y/o)<br>'I would not go around and tell everyone deliberately that I had it [COVID-19]. But now it is over, if anyone asked, I would answer honestly that I had it.' (male, 30-39 y/o) |
|                                        | Rationalisation (n = 2)    | 'We checked the incidence before we went, and it looked fine, so we didn't see any danger in going there [to a hotspot]' (female, 20-29 y/o)<br>'When I was there, it wasn't known to be a hotspot' (male, 50-59 y/o)                                                                                                                                                                                                                                                        |
|                                        | Denial or fallacy (n = 1)  | 'Maybe I didn't have it [COVID-19]. I even know couples, where one had it and the other didn't' (male, 50-59 y/o)                                                                                                                                                                                                                                                                                                                                                            |
| <b>Financial security</b>              | Financial security (n = 8) | 'I didn't face any financial problems, my salary just continued.' (male, 40-49 y/o)<br>'I was on sick leave and got my loan as usual.' (female, 20-29 y/o)<br>'I am retired, so I didn't have any financial problems.' (female, 70-79 y/o)                                                                                                                                                                                                                                   |
| <b>Interpersonal level</b>             |                            |                                                                                                                                                                                                                                                                                                                                                                                                                                                                              |
| <b>Reaction to rejective behaviour</b> | Understanding (n = 10)     | 'I could totally understand their [friends] behaviour. No one knew exactly how long people can transmit COVID' (female, 20-29 y/o)<br>'I could understand that, I didn't blame anyone.' (female 70-79 y/o)                                                                                                                                                                                                                                                                   |
|                                        | Reasoning (n = 2)          | 'I tried to explain, I argued with them [family members].... but with some people, you just can't reason at all.' (female, 50-59 y/o)<br>'When they [friends] took a step back, I told them there was no reason, they could hug me, I am no longer contagious.' (male 50-59 y/o)                                                                                                                                                                                             |
|                                        | Distancing (n = 2)         | 'When heard about what others said, I just distanced myself from that.' (male, 50-59 y/o)                                                                                                                                                                                                                                                                                                                                                                                    |

|                                 |                                              |                                                                                                                                                                                                                                                                                                                                                                                                                                                                                                                                                                                                                                   |
|---------------------------------|----------------------------------------------|-----------------------------------------------------------------------------------------------------------------------------------------------------------------------------------------------------------------------------------------------------------------------------------------------------------------------------------------------------------------------------------------------------------------------------------------------------------------------------------------------------------------------------------------------------------------------------------------------------------------------------------|
| Personal contact                | Genuine interest and mindfulness (n = 7)     | <p>'In a way, we were lucky, that the whole family was in quarantine, so we had each other' (female, 20-29 y/o)</p> <p>'It is very important, that there are people who care about you and want to know how you are doing. My mum called every day to check on me, that felt good.' (male, 30-39 y/o)</p> <p>'I would call and make sure he [friend from vignette] is okay. I would tell him, everything is going to be fine, since he is young.' (female, 20-29 y/o)</p> <p>'Some people just want to know more about it from people who had it [COVID-19] and are very interested in what I experienced.' (male, 30-39 y/o)</p> |
|                                 | Unaltered interpersonal relationship (n = 4) | <p>'With my friends, it is same way as it has been before. No distance, not too many questions.' (male, 30-39 y/o)</p> <p>'I infected my boyfriend, but he remained relaxed.' (female, 20-29 y/o)</p> <p>'When I came home from the hospital, everyone was just so happy to see me, that was very touching.' (male, 50-59 y/o)</p>                                                                                                                                                                                                                                                                                                |
|                                 | Comprehension (n = 4)                        | <p>'I talked to a friend in a similar situation, and she could totally relate.' (female, 20-29 y/o)</p> <p>'People told me it's a miracle I got through all of this without serious psychological damage. When we talked about it, it became clear, that others were frightened of being alone in such a situation as well' (female, 70-79 y/o)</p> <p>'If a friend of mine had COVID, I would support him and say it's not his fault that he got it. We didn't choose for this either.' (female, 50-59 y/o)</p>                                                                                                                  |
| <b>Community level</b>          |                                              |                                                                                                                                                                                                                                                                                                                                                                                                                                                                                                                                                                                                                                   |
| Reaction to rejective behaviour | Resignation (n = 3)                          | <p>'I can live with it [people avoiding him]. I take it with humour.' (male, 50-59 y/o)</p> <p>'I didn't really bother. Couldn't change it anyway. (...) You have to take it the way it is.' (male, 40-49 y/o)</p>                                                                                                                                                                                                                                                                                                                                                                                                                |
|                                 | Understanding (n = 3)                        | <p>'That was a new situation, people probably didn't know better.' (female, 20-29 y/o)</p> <p>'I tried to understand their reaction [people at work] and asked myself, how I would have reacted. And honestly, I would keep my distance too. That is probably human.' (male, 30-39 y/o)</p>                                                                                                                                                                                                                                                                                                                                       |
|                                 | Reasoning (n = 2)                            | <p>'I told them [people in a grocery store] I am no longer contagious and that they don't need to keep a 10-meter distance. In fact, I am less dangerous than other people.' (female, 20-29 y/o)</p>                                                                                                                                                                                                                                                                                                                                                                                                                              |
| Social network and inclusion    | Sympathy (n = 7)                             | <p>'So many people called during my absence to make sure I am okay, and they were so happy to hear from me when I called them back.' (male, 60-69 y/o)</p> <p>'I received so much sympathy, from friends and relatives, but also from the whole community, where I am active in different associations. They all felt for me and asked «Hey, how are doing?». I got a lot of positive signals. They just wanted me to recover soon.' (male, 60-69 y/o)</p>                                                                                                                                                                        |
|                                 | Solidarity and support (n = 7)               | <p>'From time to time, a neighbour would leave something for me at my door.' (female, 20-29 y/o)</p> <p>'Many people from our village offered help and asked if they could get us anything. I was surprised by their willingness to help.' (female, 50-59 y/o)</p> <p>'Some neighbours made food and left it at the door for us. They really cared about us' (male, 50-59 y/o)</p>                                                                                                                                                                                                                                                |
| <b>Institutional level</b>      |                                              |                                                                                                                                                                                                                                                                                                                                                                                                                                                                                                                                                                                                                                   |
| Reaction to discrimination      | Leniency (n = 8)                             | <p>'I guess they [the health authorities] were just overwhelmed' (male, 50-59 y/o)</p> <p>'I hope by now, it is more organised' (female, 50-59 y/o)</p> <p>'Those people refusing the regulations don't carry the responsibility. Everyone with that kind of responsibility supports a lockdown.' (male, 50-59 y/o)</p>                                                                                                                                                                                                                                                                                                           |

|                         |                                             |                                                                                                                                                                                                                                                                                                                                                                                                                                                                                                                                                                                                                                                             |
|-------------------------|---------------------------------------------|-------------------------------------------------------------------------------------------------------------------------------------------------------------------------------------------------------------------------------------------------------------------------------------------------------------------------------------------------------------------------------------------------------------------------------------------------------------------------------------------------------------------------------------------------------------------------------------------------------------------------------------------------------------|
|                         | Incomprehension (n = 8)                     | 'I was feeling sick and I couldn't get through [by telephone] to any doctor or health authority for days to get a test. That really bothered me.' (female, 20-29 y/o)<br>'I really felt mocked by the health authorities.' (female, 20-29 y/o)<br>'For me, it was extremely hard. (...) That is why I didn't tell the health authority I also had contact with my parents. I didn't want to do this to them' (male, 30-39 y/o)                                                                                                                                                                                                                              |
| <b>Received support</b> | Appreciation of health-care workers (n = 4) | 'He [family doctor] called every day to make sure I was okay. That felt good.' (female, 70-79 y/o)<br>'I remember a doctor who was looking for possible treatment options all day long and called another university hospital. In the end, the treatment saved me' (male, 50-59 y/o)<br>'The hospital staff was very caring and always very kind' (male, 60-69 y/o)                                                                                                                                                                                                                                                                                         |
|                         | Support group (n = 2)                       | 'Is there a self-help group for COVID survivors?' (male, 50-59 y/o)                                                                                                                                                                                                                                                                                                                                                                                                                                                                                                                                                                                         |
| <b>Societal level</b>   |                                             |                                                                                                                                                                                                                                                                                                                                                                                                                                                                                                                                                                                                                                                             |
| <b>Harm reduction</b>   | Law-abiding (n=5)                           | 'I kept my distance, I stuck to the rules, I didn't infect anyone.' (female, 70-79 y/o)**<br>'When we came back [from a hotspot] we stayed at home. So when we finally knew we had it [COVID-19], at least I didn't feel guilty, because I knew I didn't infect anyone else.' (female, 20-29 y/o)<br>'I was scared to infect anyone. We barely had contact, I wore a mask when I went to the bathroom, I did my laundry separately, just like the health authority told me to. In the end, none of my family members got ill, I didn't infect anyone.' (male, 30-39 y/o)**<br>'We all paid a lot of attention. We didn't infect others.' (male 50-59 y/o)** |
|                         | Social withdrawal (n = 3)                   | 'I didn't want to bother people. Maybe they would have thought I am still contagious.' (female, 70-79 y/o)<br>'When my quarantine ended, I didn't ask people to meet. I was afraid they would react.... in a strange way.' (female, 20-29 y/o)<br>'I am only on contact with my closes relatives.' (male, 50-59 y/o)                                                                                                                                                                                                                                                                                                                                        |
|                         | Hygiene advocacy (n = 3)                    | 'I tell everyone, they should wear their face masks.' (female, 70-79 y/o)<br>'No matter where we go, with all our friends, we have this discussion [about the need for regulations and hygiene practices], it is the only way. When people say «It is only a flu.», I tell them, it is not. It is a whole different affair.' (male 60-69 y/o)                                                                                                                                                                                                                                                                                                               |

\* n = the number how many times this code was applied throughout the interviews

\*\* The assurance of not having infected others reflects the perceived stigma as menace to others and the public health on one hand and efforts to contain the disease as coping with this perception on the other hand.

1  
2  
3  
4  
5  
6  
7  
8  
9  
10  
11  
12  
13  
14  
15  
16  
17  
18  
19  
20  
21  
22  
23  
24  
25  
26  
27  
28  
29  
30  
31  
32  
33  
34  
35  
36  
37  
38  
39  
40  
41  
42  
43  
44  
45  
46

|                                                                                                       |                                           |                                                                                                                                                                                                                                                                                                                                                                                 |
|-------------------------------------------------------------------------------------------------------|-------------------------------------------|---------------------------------------------------------------------------------------------------------------------------------------------------------------------------------------------------------------------------------------------------------------------------------------------------------------------------------------------------------------------------------|
| <b>Perception of legal stipulations</b><br><br>(measures of containment, mandatory face mask, curfew) | Support (n = 5)                           | 'I tell everyone, they should wear their face masks, if they got it [COVID-19], it's to late.' (female, 73 y/o)<br>'I wish people would pull themselves together. (...) If you are unlucky, you are gone.' (male, 69 y/o)                                                                                                                                                       |
|                                                                                                       | Acceptance (in spite of struggle) (n = 6) | 'I longed to go out for a walk....but I stayed inside' (female, 25 y/o)<br>'We were all cramped together. After some time, it is normal you go on each other's nerve.... Then you need to withdraw to have your own space' (female 23 y/o)                                                                                                                                      |
|                                                                                                       | Confusion (n = 6)                         | 'I think the whole topic is very confusing, I am missing a clear line. The regulations are different in different places, that confuses people.' (female, 51 y/o)<br>'Sometimes, the regulations seem a bit random.' (male, 38 y/o)<br>'Of course we need certain restrictions, but sometimes it feels like those in charge didn't really think that through.' (female, 25 y/o) |
|                                                                                                       | Doubt and refuse (n = 3)                  | 'For me, it was extremely hard. (...) That is why I didn't tell the health authority I also had contact with my parents. I didn't want to do this to them' (male, 38 y/o)<br>'I am not sure, if wearing these masks is really the solution for this problem.' (male, 53 y/o)<br>'I am not supporting these masks.... It is hard to breathe.' (male 55 y/o)                      |
|                                                                                                       | Hope (n = 2)                              | 'Maybe we can all go back to normal soon.' (male, 38 y/o)                                                                                                                                                                                                                                                                                                                       |

## Standards for Reporting Qualitative Research (SRQR)\*

<http://www.equator-network.org/reporting-guidelines/srqr/>

Page/line no(s).

### Title and abstract

|                                                                                                                                                                                                                                                              |     |
|--------------------------------------------------------------------------------------------------------------------------------------------------------------------------------------------------------------------------------------------------------------|-----|
| <p><b>Title</b> - Concise description of the nature and topic of the study Identifying the study as qualitative or indicating the approach (e.g., ethnography, grounded theory) or data collection methods (e.g., interview, focus group) is recommended</p> | p 1 |
| <p><b>Abstract</b> - Summary of key elements of the study using the abstract format of the intended publication; typically includes background, purpose, methods, results, and conclusions</p>                                                               | p 1 |

### Introduction

|                                                                                                                                                                     |    |
|---------------------------------------------------------------------------------------------------------------------------------------------------------------------|----|
| <p><b>Problem formulation</b> - Description and significance of the problem/phenomenon studied; review of relevant theory and empirical work; problem statement</p> | p2 |
| <p><b>Purpose or research question</b> - Purpose of the study and specific objectives or questions</p>                                                              | p2 |

### Methods

|                                                                                                                                                                                                                                                                                                                                                                                                             |      |
|-------------------------------------------------------------------------------------------------------------------------------------------------------------------------------------------------------------------------------------------------------------------------------------------------------------------------------------------------------------------------------------------------------------|------|
| <p><b>Qualitative approach and research paradigm</b> - Qualitative approach (e.g., ethnography, grounded theory, case study, phenomenology, narrative research) and guiding theory if appropriate; identifying the research paradigm (e.g., postpositivist, constructivist/ interpretivist) is also recommended; rationale**</p>                                                                            | p4   |
| <p><b>Researcher characteristics and reflexivity</b> - Researchers' characteristics that may influence the research, including personal attributes, qualifications/experience, relationship with participants, assumptions, and/or presuppositions; potential or actual interaction between researchers' characteristics and the research questions, approach, methods, results, and/or transferability</p> | p14  |
| <p><b>Context</b> - Setting/site and salient contextual factors; rationale**</p>                                                                                                                                                                                                                                                                                                                            |      |
| <p><b>Sampling strategy</b> - How and why research participants, documents, or events were selected; criteria for deciding when no further sampling was necessary (e.g., sampling saturation); rationale**</p>                                                                                                                                                                                              | p4   |
| <p><b>Ethical issues pertaining to human subjects</b> - Documentation of approval by an appropriate ethics review board and participant consent, or explanation for lack thereof; other confidentiality and data security issues</p>                                                                                                                                                                        | p4   |
| <p><b>Data collection methods</b> - Types of data collected; details of data collection procedures including (as appropriate) start and stop dates of data collection and analysis, iterative process, triangulation of sources/methods, and modification of procedures in response to evolving study findings; rationale**</p>                                                                             | p4-5 |



|                       |                                                                                                                                                                                                                                                       |                  |
|-----------------------|-------------------------------------------------------------------------------------------------------------------------------------------------------------------------------------------------------------------------------------------------------|------------------|
| 1<br>2<br>3<br>4<br>5 | <b>Data collection instruments and technologies</b> - Description of instruments (e.g., interview guides, questionnaires) and devices (e.g., audio recorders) used for data collection; if/how the instrument(s) changed over the course of the study | p4 (S2)          |
| 6<br>7<br>8           | <b>Units of study</b> - Number and relevant characteristics of participants, documents, or events included in the study; level of participation (could be reported in results)                                                                        | p4-5 and table 1 |
| 9<br>10<br>11<br>12   | <b>Data processing</b> - Methods for processing data prior to and during analysis, including transcription, data entry, data management and security, verification of data integrity, data coding, and anonymization/de-identification of excerpts    | p4-5             |
| 13<br>14<br>15<br>16  | <b>Data analysis</b> - Process by which inferences, themes, etc., were identified and developed, including the researchers involved in data analysis; usually references a specific paradigm or approach; rationale**                                 | p5               |
| 17<br>18<br>19<br>20  | <b>Techniques to enhance trustworthiness</b> - Techniques to enhance trustworthiness and credibility of data analysis (e.g., member checking, audit trail, triangulation); rationale**                                                                | p5               |

### Results/findings

|                            |                                                                                                                                                                                                   |                                              |
|----------------------------|---------------------------------------------------------------------------------------------------------------------------------------------------------------------------------------------------|----------------------------------------------|
| 23<br>24<br>25<br>26       | <b>Synthesis and interpretation</b> - Main findings (e.g., interpretations, inferences, and themes); might include development of a theory or model, or integration with prior research or theory | p7-11 (and figure 3 as model)                |
| 27<br>28<br>29<br>30<br>31 | <b>Links to empirical data</b> - Evidence (e.g., quotes, field notes, text excerpts, photographs) to substantiate analytic findings                                                               | p7-p11 (and more quotes and notes in S3, S4) |

### Discussion

|                                        |                                                                                                                                                                                                                                                                                                                                                                                                             |        |
|----------------------------------------|-------------------------------------------------------------------------------------------------------------------------------------------------------------------------------------------------------------------------------------------------------------------------------------------------------------------------------------------------------------------------------------------------------------|--------|
| 34<br>35<br>36<br>37<br>38<br>39<br>40 | <b>Integration with prior work, implications, transferability, and contribution(s) to the field</b> - Short summary of main findings; explanation of how findings and conclusions connect to, support, elaborate on, or challenge conclusions of earlier scholarship; discussion of scope of application/generalizability; identification of unique contribution(s) to scholarship in a discipline or field | p12-14 |
| 41                                     | <b>Limitations</b> - Trustworthiness and limitations of findings                                                                                                                                                                                                                                                                                                                                            | p14    |

### Other

|                |                                                                                                                                               |     |
|----------------|-----------------------------------------------------------------------------------------------------------------------------------------------|-----|
| 44<br>45<br>46 | <b>Conflicts of interest</b> - Potential sources of influence or perceived influence on study conduct and conclusions; how these were managed | p15 |
| 47<br>48       | <b>Funding</b> - Sources of funding and other support; role of funders in data collection, interpretation, and reporting                      | p15 |

\*The authors created the SRQR by searching the literature to identify guidelines, reporting standards, and critical appraisal criteria for qualitative research; reviewing the reference lists of retrieved sources; and contacting experts to gain feedback. The SRQR aims to improve the transparency of all aspects of qualitative research by providing clear standards for reporting qualitative research.

1  
2  
3  
4  
5  
6  
7  
8  
9  
10  
11  
12  
13  
14  
15  
16  
17  
18  
19  
20  
21  
22  
23  
24  
25  
26  
27  
28  
29  
30  
31  
32  
33  
34  
35  
36  
37  
38  
39  
40  
41  
42  
43  
44  
45  
46  
47  
48  
49  
50  
51  
52  
53  
54  
55  
56  
57  
58  
59  
60

\*\*The rationale should briefly discuss the justification for choosing that theory, approach, method, or technique rather than other options available, the assumptions and limitations implicit in those choices, and how those choices influence study conclusions and transferability. As appropriate, the rationale for several items might be discussed together.

**Reference:**

O'Brien BC, Harris IB, Beckman TJ, Reed DA, Cook DA. **Standards for reporting qualitative research: a synthesis of recommendations.** *Academic Medicine*, Vol. 89, No. 9 / Sept 2014  
DOI: 10.1097/ACM.0000000000000388

For peer review only

## STROBE Statement—checklist of items that should be included in reports of observational studies

|                              | Item No | Recommendation                                                                                                                                                                                                                                                                                                                                                                                                                                                         | Page No |
|------------------------------|---------|------------------------------------------------------------------------------------------------------------------------------------------------------------------------------------------------------------------------------------------------------------------------------------------------------------------------------------------------------------------------------------------------------------------------------------------------------------------------|---------|
| <b>Title and abstract</b>    | 1       | (a) Indicate the study's design with a commonly used term in the title or the abstract                                                                                                                                                                                                                                                                                                                                                                                 | 1 and 2 |
|                              |         | (b) Provide in the abstract an informative and balanced summary of what was done and what was found                                                                                                                                                                                                                                                                                                                                                                    | 2       |
| <b>Introduction</b>          |         |                                                                                                                                                                                                                                                                                                                                                                                                                                                                        |         |
| Background/rationale         | 2       | Explain the scientific background and rationale for the investigation being reported                                                                                                                                                                                                                                                                                                                                                                                   | 4       |
| Objectives                   | 3       | State specific objectives, including any prespecified hypotheses                                                                                                                                                                                                                                                                                                                                                                                                       | 4       |
| <b>Methods</b>               |         |                                                                                                                                                                                                                                                                                                                                                                                                                                                                        |         |
| Study design                 | 4       | Present key elements of study design early in the paper                                                                                                                                                                                                                                                                                                                                                                                                                | 5       |
| Setting                      | 5       | Describe the setting, locations, and relevant dates, including periods of recruitment, exposure, follow-up, and data collection                                                                                                                                                                                                                                                                                                                                        | 5       |
| Participants                 | 6       | (a) <i>Cohort study</i> —Give the eligibility criteria, and the sources and methods of selection of participants. Describe methods of follow-up<br><i>Case-control study</i> —Give the eligibility criteria, and the sources and methods of case ascertainment and control selection. Give the rationale for the choice of cases and controls<br><i>Cross-sectional study</i> —Give the eligibility criteria, and the sources and methods of selection of participants | 5       |
|                              |         | (b) <i>Cohort study</i> —For matched studies, give matching criteria and number of exposed and unexposed<br><i>Case-control study</i> —For matched studies, give matching criteria and the number of controls per case                                                                                                                                                                                                                                                 |         |
| Variables                    | 7       | Clearly define all outcomes, exposures, predictors, potential confounders, and effect modifiers. Give diagnostic criteria, if applicable                                                                                                                                                                                                                                                                                                                               | 5       |
| Data sources/<br>measurement | 8*      | For each variable of interest, give sources of data and details of methods of assessment (measurement). Describe comparability of assessment methods if there is more than one group                                                                                                                                                                                                                                                                                   | 5       |
| Bias                         | 9       | Describe any efforts to address potential sources of bias                                                                                                                                                                                                                                                                                                                                                                                                              | 5       |
| Study size                   | 10      | Explain how the study size was arrived at                                                                                                                                                                                                                                                                                                                                                                                                                              | 5       |
| Quantitative variables       | 11      | Explain how quantitative variables were handled in the analyses. If applicable, describe which groupings were chosen and why                                                                                                                                                                                                                                                                                                                                           | 5       |
| Statistical methods          | 12      | (a) Describe all statistical methods, including those used to control for confounding                                                                                                                                                                                                                                                                                                                                                                                  | 5       |
|                              |         | (b) Describe any methods used to examine subgroups and interactions                                                                                                                                                                                                                                                                                                                                                                                                    | 5       |
|                              |         | (c) Explain how missing data were addressed                                                                                                                                                                                                                                                                                                                                                                                                                            | 5       |
|                              |         | (d) <i>Cohort study</i> —If applicable, explain how loss to follow-up was addressed<br><i>Case-control study</i> —If applicable, explain how matching of cases and controls was addressed<br><i>Cross-sectional study</i> —If applicable, describe analytical methods taking account of sampling strategy                                                                                                                                                              | 5       |
|                              |         | (e) Describe any sensitivity analyses                                                                                                                                                                                                                                                                                                                                                                                                                                  | 5       |

Continued on next page

| <b>Results</b>           |     |                                                                                                                                                                                                              |       |
|--------------------------|-----|--------------------------------------------------------------------------------------------------------------------------------------------------------------------------------------------------------------|-------|
| Participants             | 13* | (a) Report numbers of individuals at each stage of study—eg numbers potentially eligible, examined for eligibility, confirmed eligible, included in the study, completing follow-up, and analysed            | 7     |
|                          |     | (b) Give reasons for non-participation at each stage                                                                                                                                                         | (7)   |
|                          |     | (c) Consider use of a flow diagram                                                                                                                                                                           | n.a.  |
| Descriptive data         | 14* | (a) Give characteristics of study participants (eg demographic, clinical, social) and information on exposures and potential confounders                                                                     | 5     |
|                          |     | (b) Indicate number of participants with missing data for each variable of interest                                                                                                                          | (7)   |
|                          |     | (c) <i>Cohort study</i> —Summarise follow-up time (eg, average and total amount)                                                                                                                             | n.a.  |
| Outcome data             | 15* | <i>Cohort study</i> —Report numbers of outcome events or summary measures over time                                                                                                                          | n.a.  |
|                          |     | <i>Case-control study</i> —Report numbers in each exposure category, or summary measures of exposure                                                                                                         | n.a.  |
|                          |     | <i>Cross-sectional study</i> —Report numbers of outcome events or summary measures                                                                                                                           | 7     |
| Main results             | 16  | (a) Give unadjusted estimates and, if applicable, confounder-adjusted estimates and their precision (eg, 95% confidence interval). Make clear which confounders were adjusted for and why they were included | 7     |
|                          |     | (b) Report category boundaries when continuous variables were categorized                                                                                                                                    | n.a.  |
|                          |     | (c) If relevant, consider translating estimates of relative risk into absolute risk for a meaningful time period                                                                                             | n.a.  |
| Other analyses           | 17  | Report other analyses done—eg analyses of subgroups and interactions, and sensitivity analyses                                                                                                               | 8     |
| <b>Discussion</b>        |     |                                                                                                                                                                                                              |       |
| Key results              | 18  | Summarise key results with reference to study objectives                                                                                                                                                     | 13    |
| Limitations              | 19  | Discuss limitations of the study, taking into account sources of potential bias or imprecision. Discuss both direction and magnitude of any potential bias                                                   | 15    |
| Interpretation           | 20  | Give a cautious overall interpretation of results considering objectives, limitations, multiplicity of analyses, results from similar studies, and other relevant evidence                                   | 13/14 |
| Generalisability         | 21  | Discuss the generalisability (external validity) of the study results                                                                                                                                        | 14    |
| <b>Other information</b> |     |                                                                                                                                                                                                              |       |
| Funding                  | 22  | Give the source of funding and the role of the funders for the present study and, if applicable, for the original study on which the present article is based                                                | 1     |

\*Give information separately for cases and controls in case-control studies and, if applicable, for exposed and unexposed groups in cohort and cross-sectional studies.

**Note:** An Explanation and Elaboration article discusses each checklist item and gives methodological background and published examples of transparent reporting. The STROBE checklist is best used in conjunction with this article (freely available on the Web sites of PLoS Medicine at <http://www.plosmedicine.org/>, Annals of Internal Medicine at <http://www.annals.org/>, and Epidemiology at <http://www.epidem.com/>). Information on the STROBE Initiative is available at [www.strobe-statement.org](http://www.strobe-statement.org).

# BMJ Open

## Experienced stigma and applied coping strategies during the COVID-19 pandemic in Germany - A mixed-methods study

|                                 |                                                                                                                                                                                                                                                                                                                                                                  |
|---------------------------------|------------------------------------------------------------------------------------------------------------------------------------------------------------------------------------------------------------------------------------------------------------------------------------------------------------------------------------------------------------------|
| Journal:                        | <i>BMJ Open</i>                                                                                                                                                                                                                                                                                                                                                  |
| Manuscript ID                   | bmjopen-2021-059472.R2                                                                                                                                                                                                                                                                                                                                           |
| Article Type:                   | Original research                                                                                                                                                                                                                                                                                                                                                |
| Date Submitted by the Author:   | 13-Jul-2022                                                                                                                                                                                                                                                                                                                                                      |
| Complete List of Authors:       | Peters, Lynn; University Hospital Ulm, Internal Medicine III, Division of Infectious Diseases<br>Burkert, Sanne; University Hospital Ulm, Internal Medicine III, Division of Infectious Diseases<br>Brenner, Cecilia; Regional Office of Communicable Diseases<br>Grüner, Beate; University Hospital Ulm, Internal Medicine III, Division of Infectious Diseases |
| <b>Primary Subject Heading</b>: | Infectious diseases                                                                                                                                                                                                                                                                                                                                              |
| Secondary Subject Heading:      | Global health, Infectious diseases, Mental health, Qualitative research, Sociology                                                                                                                                                                                                                                                                               |
| Keywords:                       | COVID-19, MENTAL HEALTH, SOCIAL MEDICINE                                                                                                                                                                                                                                                                                                                         |
|                                 |                                                                                                                                                                                                                                                                                                                                                                  |

SCHOLARONE™  
Manuscripts



I, the Submitting Author has the right to grant and does grant on behalf of all authors of the Work (as defined in the below author licence), an exclusive licence and/or a non-exclusive licence for contributions from authors who are: i) UK Crown employees; ii) where BMJ has agreed a CC-BY licence shall apply, and/or iii) in accordance with the terms applicable for US Federal Government officers or employees acting as part of their official duties; on a worldwide, perpetual, irrevocable, royalty-free basis to BMJ Publishing Group Ltd ("BMJ") its licensees and where the relevant Journal is co-owned by BMJ to the co-owners of the Journal, to publish the Work in this journal and any other BMJ products and to exploit all rights, as set out in our [licence](#).

The Submitting Author accepts and understands that any supply made under these terms is made by BMJ to the Submitting Author unless you are acting as an employee on behalf of your employer or a postgraduate student of an affiliated institution which is paying any applicable article publishing charge ("APC") for Open Access articles. Where the Submitting Author wishes to make the Work available on an Open Access basis (and intends to pay the relevant APC), the terms of reuse of such Open Access shall be governed by a Creative Commons licence – details of these licences and which [Creative Commons](#) licence will apply to this Work are set out in our licence referred to above.

Other than as permitted in any relevant BMJ Author's Self Archiving Policies, I confirm this Work has not been accepted for publication elsewhere, is not being considered for publication elsewhere and does not duplicate material already published. I confirm all authors consent to publication of this Work and authorise the granting of this licence.

1  
2  
3  
4  
5 1 Experienced stigma and applied coping strategies during the  
6  
7 2 COVID-19 pandemic in Germany  
8

9  
10 3 - A mixed methods study -  
11  
12 4

13  
14 5 **Lynn Peters<sup>1\*</sup>, Sanne Burkert<sup>1</sup>, Cecilia Brenner<sup>2</sup>, Beate Grüner<sup>1</sup>**  
15  
16 6

- 17  
18 7 1) University Hospital of Ulm, Department of Internal Medicine III, Division of Infectious  
19 8 Diseases, Ulm, Germany  
20 9 2) Regional Office of Communicable Diseases, Uppsala, Uppsala Region, Sweden  
21 10  
22 11

23  
24  
25 12 \* Corresponding author  
26

27 13 E-Mail: [lynn.peters@uniklinik-ulm.de](mailto:lynn.peters@uniklinik-ulm.de)  
28  
29 14  
30  
31 15  
32  
33 16  
34  
35  
36  
37  
38  
39  
40  
41  
42  
43  
44  
45  
46  
47  
48  
49  
50  
51  
52  
53  
54  
55  
56  
57  
58  
59  
60



## 17 Abstract

18 **Objective** Health-related stigma is considered a social determinant of health equity and a hidden  
19 burden of disease. This study aimed to assess the level and dimensions of stigma and respective coping  
20 mechanisms in COVID-19-survivors.

21 **Methods** A mixed-methods study with sequential explanatory design was conducted at the  
22 University Hospital of Ulm, Germany. Stigma was assessed using the Social Impact Scale (SIS) including  
23 adult COVID-19 survivors with mild to severe disease. Subsequently, 14 participants were sampled with  
24 regard to gender, age and severity of disease for in-depth interviews to understand how stigma was  
25 experienced and coping strategies were applied. The questionnaire was analysed using descriptive  
26 statistics, *t*-test and ANOVA. Content analysis was used for qualitative data.

27 **Results** From 61 participants, 58% were male and mean age was 51 years. The quantitative  
28 analysis of the SIS indicated an intermediate level of experienced stigma. Participants experienced  
29 stigma mainly as 'social rejection' ( $M = 14.22$ ,  $SD = 4.91$ ), followed by 'social isolation' ( $M = 10.17$ ,  $SD$   
30  $= 4.16$ ) and 'internalized shame' ( $M = 8.39$ ,  $SD = 3.32$ ). There was no significant difference in  
31 experienced stigma regarding gender, education, occupational status, or residual symptoms. However,  
32 participants between 30 and 39 experienced higher levels of stigma than other age groups ( $p = 0.034$ ).  
33 The qualitative analysis revealed how stigma seemed to arise from misconceptions creating irrational  
34 fear of infection, leading to stereotyping, vilification, discrimination, and social exclusion of COVID-19  
35 survivors, leaving them feeling vulnerable. Stigma cut through all social levels, from the individual level  
36 at the bottom to the institutional and societal level at the top. Social networks protected from  
37 experiencing stigma.

38 **Conclusion** COVID-19-related stigma is a relevant burden in the ongoing pandemic. Providing  
39 accurate information and exposing misinformation on disease prevention and treatment seems key to  
40 end COVID-19 related stigma.

## 45 Strengths and limitations of this study

### 46 *Strengths*

- 47 • Mixed-methods approach to gain an in-depth understanding of COVID-19 related stigma and  
48 applied coping strategies
- 49 • Detailed list of quotes for every theme to increase transparency, objectivity, and traceability

### 50 *Limitations*

- 51 • Telephone interviews instead of face-to-face interviews because of contact regulations
- 52 • Single-centre study design
- 53 • Lack of a validated instrument particularly designed to assess stigma in COVID-19 survivors

## 56 Introduction

57 Health-related stigma is a social phenomenon, which implies a negative attitude towards people with  
58 a certain condition (1,2). Stigma occurs in different forms (3): It can result from assumed attitudes of  
59 others (perceived stigma), discriminatory behaviours (enacted stigma), a shift to a devalued self-  
60 perception (internalized stigma) and inequities embedded in policies, institutions, and social  
61 organizations (structural stigma). Regarding health, stigma is often seen as a hidden burden of disease  
62 (4) and a social determinant of health and health inequity (5). It generates psychological stress (6) and  
63 causes affected people to hide their condition with severe consequences for their own health, and in  
64 case of infectious diseases, for public health (7). In the context of the COVID-19 (coronavirus disease  
65 2019) pandemic, the risk of stigmatization has been addressed early (8–10) and reports of  
66 discrimination against patients and survivors have accumulated (11). Across the globe, people infected  
67 with or recovered from SARS-CoV-2 (Severe Acute Respiratory Syndrome Coronavirus-2) became a  
68 target of ostracism, humiliation, harassment and even violence. Studies from Pakistan, Uganda,  
69 Malaysia, India, China, Ghana, Iran and Brazil found that COVID-19 survivors and even their families  
70 were often rejected from social life or essential services and felt humiliated (12–21). COVID-19  
71 survivors were blamed for the disease (13,15,16) and perceived as a source of infection even after  
72 being cured (12,16,21,22), some reported financial hardship as a consequence (13,19,23). Stereotyping  
73 was common (15), especially blaming the poor, labourers and migrants (16) or people of seemingly  
74 Asian origin (24–26). Research from Malaysia, Iran and Tunisia found that affected people made efforts  
75 to hide the infection (15,20,27). Due to stigma, people with suspected COVID-19 might avoid testing  
76 or treatment facilities, leading to poor health outcomes and the further spread of the virus.  
77 So far, most studies were conducted in low- and middle-income countries and little is known about the  
78 phenomenon in high-income countries. Labbé et al. (2022) (24) analysed editorial cartoons from  
79 Canadian newspapers and found, amongst others, a stigmatising attitude towards people from certain  
80 geographical areas with high SARS-CoV-2 incidence rates. A recent study from Spain using a survey  
81 among the general population could demonstrate that discrimination and internalised stigma  
82 increased and decreased with the dynamic of the pandemic (28). To the best of our knowledge, no  
83 study so far assessed COVID-19 related stigma in survivors from high-income countries. Therefore, our  
84 objective was to evaluate the level and dimensions of experienced stigma and applied coping strategies  
85 in COVID-19 survivors during the early pandemic in a high-income setting.

86

87

## 88 Methods

### 89 Sampling and data collection

90 We conducted a sequential explanatory mixed-method study in the area of Ulm, Germany. Every adult  
91 with positive SARS-CoV-2-PCR nasopharyngeal swab was included that presented either at the  
92 hospital's outpatient COVID-19-testing centre, the hospital's emergency room or that was admitted to  
93 the hospital between March and May 2020 (n = 150). Exclusion criteria were age < 18 years and death  
94 during hospitalisation. The 'Social Impact Scale' (SIS) questionnaire (quantitative methods), a form  
95 assessing residual symptoms and socio-economic factors and a form on which participants could  
96 optionally provide a phone number for the phone interviews were sent to the COVID-19 survivors 3 to  
97 9 months *post infectionem*. After the quantitative analysis confirmed experienced stigma in COVID-19  
98 survivors, a phenomenological approach was employed using in-depth interviews (qualitative  
99 methods) to explore why and how stigma was experienced and to assess possible coping strategies.  
100 The study was approved by the ethical board of the University of Ulm (No. 315/20).

### 101 Quantitative methods

#### 102 *The 'Social Impact Scale' questionnaire*

103 Experienced stigma was assessed with the 24-item SIS questionnaire designed by Fife & Wright (2000)  
104 (29) for people living with HIV/AIDS or cancer and translated to German by Eichhorn et. al. (2015) with  
105 good psychometric properties (Cronbach's  $\alpha = 0.81 - 0.89$ ) (30). We added 7 additional COVID-19-  
106 related questions (c.f. supplementary material 1), which were evaluated separately. On a 4-point Likert  
107 scale, participants rate the given statements (items) from 'I strongly disagree' to 'I strongly agree' (1  
108 to 4 points) resulting in an overall stigma score. These items are assigned to different dimensions of  
109 stigma, namely 'social rejection' (9 items), 'internalized shame' (5 items), 'social isolation' (7 items)  
110 and 'financial insecurity' (3 items) and are evaluated separately.

#### 111 *Statistical analysis*

112 Statistical analyses were performed using IBM SPSS Statistics V23. Descriptive analyses included  
113 demographic information, post-COVID-19 symptoms, the overall level of stigma and its dimensions.  
114 Results are reported in means (M) and standard deviation (SD). Univariate analyses were performed  
115 assessing differences in experienced stigma regarding gender, age groups, education, occupational  
116 status, and residual symptoms using *t*-Test, ANOVA and correlation where appropriate. Missing data  
117 were handled by listwise exclusion. A significance level of  $p < 0.05$  was considered significant.

### 118 Qualitative methods

#### 119 *Sampling and data collection*

120 From those participants consenting to an in-depth interview, we purposefully sampled a broad range  
121 with high and low perceived stigma based on the questionnaire, different severity of disease, gender,  
122 age, and education to gain diverse accounts of the phenomenon. Data were analysed using MAXQDA  
123 Plus 2020. The analysis began after the 5<sup>th</sup> interview and data saturation was reached after the 11<sup>th</sup>.  
124 Three additional interviews were conducted to ensure no new themes emerged, resulting in a total  
125 number of 14 interviews. The interviews were held in German, being the native language of the  
126 participants and followed an interview guide (c.f. supplementary material 2). However, the interviewer  
127 (LP) aimed for an open discussion, allowing the interviewee to determine which topics to focus on.  
128 Due to contact regulations, the interviews were conducted by phone and recorded.

### 129 *Analysis and trustworthiness*

130 After transcription, the analysis was conducted in English, i.e. English codes were applied to the  
131 German transcripts. Translating the transcripts to English was avoided in order to remain close to the  
132 source data and avoid a loss of information. LP used content analysis to develop a preliminary coding  
133 scheme from emerging codes and themes (inductive 'bottom-up' approach). Coding is the first step in  
134 qualitative analysis in which phrases are linked and shapes an idea (31–33), i.e. coding implies  
135 computing meaning (34). Subsequently, the interpretation of these rather explicit and descriptive  
136 codes generates more latent and subtle subthemes that give a deeper understanding of the  
137 phenomenon (35–37). As a final step, overarching themes evolve, which allowed organising the data  
138 into a comprehensive framework. To ensure reliability, the coding scheme was subsequently applied  
139 to the interviews by SB and BG (deductive 'top-down' approach). Deviant codes were discussed within  
140 the research team and adjusted (peer-check), resulting in a refined coding scheme. To increase  
141 transparency, additional tables with key quotes for each code are attached (c.f. supplementary  
142 material 3 and 4). Using mixed methods allows for methodological triangulation, i.e. assessing the  
143 phenomenon from different perspectives.

### 145 *Patient and public involvement*

146 This research was inspired by patients' narratives from our post-COVID-19 outpatient department.  
147 During follow-up visits, patients moved from physical complaints to social consequences they  
148 experienced after having COVID-19, which often involved stigma. The interview guide was informed  
149 by those narratives. As mentioned earlier, the interview was designed as an open discussion allowing  
150 the participants to prioritise topics and report their experiences freely. However, patients were not  
151 involved in designing or recruiting. We aim to offer a lay summary in German on our website to inform  
152 participants about the results.

## 153 Results

### 154 Quantitative results

#### 155 *Descriptive results*

156 In total, 61 questionnaires were analysed which equals a response rate of 41%. The socio-economic  
157 characteristics and residual symptoms are displayed in table 1.

| Variable                        | Results (%)                                    | Residual Symptoms    | N                         | %     |       |
|---------------------------------|------------------------------------------------|----------------------|---------------------------|-------|-------|
| Age                             | M = 51 years (SD = 14.6, Min. = 18, Max. = 78) | Dyspnoea on exertion | 11                        | 20.4% |       |
| Gender                          | Male                                           | 58%                  | Fatigue                   | 6     | 12.2% |
|                                 | Female                                         | 42%                  | Paraesthesia              | 5     | 10.2% |
| Education                       | No formal education                            | 0%                   | Cough                     | 4     | 8.2%  |
|                                 | Lower secondary education, no graduation       | 11.5%                | Sore throat               | 4     | 8.2%  |
|                                 | Lower secondary education, graduation          | 9.8%                 | Cephalgia                 | 4     | 8.2%  |
|                                 | Intermediate secondary education               | 26.2%                | Palpitations              | 4     | 8.2%  |
|                                 | Upper secondary education                      | 18.8%                | Rhinorrhoea               | 3     | 6.1%  |
|                                 | High school graduation                         | 34.4%                | Loss of smell and taste   | 3     | 6.1%  |
| Occupation                      | Regularly employed                             | 70.3%                | Diarrhoea                 | 2     | 4.1%  |
|                                 | Unemployed/ receiving pension                  | 15.6%                | Myalgia                   | 2     | 4.1%  |
|                                 | Student/ trainee                               | 6.3%                 | Xerophthalmia             | 2     | 4.1%  |
| People informed about infection | Close family members                           | 98.4%                | Sleeping disorder         | 2     | 4.1%  |
|                                 | Friends                                        | 95.3%                | Loss of hair              | 2     | 4.1%  |
|                                 | Acquaintances                                  | 81.3%                | Lack of attention         | 2     | 4.1%  |
|                                 | Distant relatives                              | 78.1%                | Mucus                     | 1     | 2.0%  |
|                                 | Close co-workers                               | 76.6%                | Dyspnoea without exertion | 0     | 0%    |
|                                 | Neighbours                                     | 73.4%                | Fever                     | 0     | 0%    |
|                                 | Superiors                                      | 71.9%                | Hearing loss              | 0     | 0%    |
|                                 | Distant co-workers                             | 50.0%                | Loss of vision            | 0     | 0%    |

158 Table 1: Socio-economic characteristics and residual symptoms

#### 159 *The Social Impact Scale*

160 Each of the 31 items (24 SIS items and 7 COVID-19-related items) was rated with 1 to 4 points, resulting  
161 in a possible total score of 31 to 124. The total stigma score in our cohort ranged from 31 to 97 with a  
162 mean of 48.1 ( $SD = 13.1$ ), and a median of 45.0 (c.f. Figure 1A). Analysing the dimensions of stigma  
163 based on the 24 SIS items, 'internalized shame' ( $M = 1.68$ ,  $SD = 0.66$ ) and 'social rejection' ( $M = 1.58$ ,  
164  $SD = 0.55$ ) showed the highest levels of stigma, followed by 'social isolation' ( $M = 1.45$ ,  $SD = 0.59$ ).  
165 'Financial insecurity' ( $M = 1.17$ ,  $SD = 0.46$ ) played a minor role (c.f. Figure 1B). The overall mean per  
166 item was 1.55 ( $SD = 0.42$ ). Adapted to the original questionnaire (29), we calculated aggregate means:  
167 'social rejection' showed the highest aggregate mean ( $M = 14.22$ ,  $SD = 4.91$ ), followed by 'social  
168 isolation' ( $M = 10.17$ ,  $SD = 4.16$ ) and 'internalized shame' ( $M = 8.39$ ,  $SD = 3.32$ ) and, ultimately, financial  
169 insecurity ( $M = 3.51$ ,  $SD = 1.38$ ). The data were evenly distributed. Items of special interest are  
170 summarised in table 2.

171

172 *Figure 1. A: Social Impact Scale, overall score. B: Dimensions of stigma. High numbers equal high level of experienced*  
173 *stigma.*

| Items with the highest experienced stigma:                                                            | M    |
|-------------------------------------------------------------------------------------------------------|------|
| 'I feel others are concerned they could catch my illness.'                                            | 2.52 |
| 'I feel guilty because I accidentally might have infected others.*'                                   | 2.03 |
| 'I feel others think I am to blame for my illness.'                                                   | 2.00 |
| 'Due to my illness others seem to feel awkward and tense when they are around me.'                    | 1.97 |
| 'I feel institutions and professionals (health authority, health care workers) treated me unfairly.*' | 1.81 |
| Items with the lowest experienced stigma:                                                             | M    |
| 'I have experienced financial hardship that has affected my relationship with others.'                | 1.08 |
| 'Some family members have rejected me because of my illness.'                                         | 1.11 |

|                                                    |      |
|----------------------------------------------------|------|
| 'My job security has been affected by my illness.' | 1.15 |
|----------------------------------------------------|------|

Table 2: Items of special interest from the questionnaire. \*Additional COVID-19-related questions.

There was no difference in experienced stigma comparing gender ( $t(59) = 0.437, p = 0.664$ ), educational level ( $F(4) = 0.687, p = 0.604$ ), occupational status ( $F(3) = 0.995, p = 0.404$ ) or residual symptoms (composite score of symptoms) ( $r(46) = -0.250, p = 0.093$ ). However, there was a significant difference in age: participants between 30 and 39 experienced higher levels of stigma than other age groups ( $F(6) = 2.499, p = 0.034$ ).

## Qualitative results

Before conducting the interviews, participants were selected to balance gender, age groups, educational background, and severity of disease (c.f. table 3). Gender distribution and mean age were equivalent to the quantitative results. Participants from the ends of the age range, with different educational level and severity of disease were purposefully sampled.

The analytical process revealed how COVID-19 survivors experienced stigma as a multi-layered phenomenon: The descriptive codes and latent subthemes generated overarching themes that represent the societal layer in which stigma was experienced and coping strategies were applied. The following section will guide the reader through each layer, starting with the individual layer and continuing to the immediate and then wider environment. The number of times respective codes were applied throughout the interviews is indicated by (n). To keep this report concise, only one exemplary quote for every code is presented. However, we invite the reader to consult the supplementary materials S3 and S4, which offer additional quotes.

|                                |                            |                                   |                                 |         |
|--------------------------------|----------------------------|-----------------------------------|---------------------------------|---------|
| Gender (N)                     | Male: 8                    | Female: 6                         |                                 |         |
| Age in years                   | Mean: 51.8                 | Median: 52                        | Min: 23                         | Max: 77 |
| ISCED* 2011 level of education | Mean: 3.7                  | Median: 3                         | Min: 2                          | Max: 7  |
| Severity of disease (N)**      | Ambulatory mild disease: 4 | Hospitalised, moderate disease: 6 | Hospitalised, severe disease: 4 |         |
| Length of interview in minutes | Mean: 48                   | Median: 41                        | Min: 18                         | Max: 76 |

\* International Standard Classification of Education ranging from 0 (early childhood education) to 8 (doctorate or equivalent)

\*\*according to the WHO classification (38)

Table 3: Characteristics of interviewees and length of interviews

### Theme 1: the individual layer

**Vulnerability** was identified as key subtheme contributing to or resulting from internalized or perceived stigma. Different codes added to increased vulnerability:

Fear, worries and despair (n = 11): 'I was thinking «why me???»... and «I hope this ends well...»' (female (f), 50-59 y/o); Most participants were worried about the outcome, especially elderly patients and those referred to the hospital.

Shame, guilt or remorse (n = 14): 'Of course you feel bad knowing you infected others' (f, 20-29 y/o); Although infecting others happened unwittingly in all cases, participants often felt as active 'spreader'. This caused feelings of shame and remorse.

Loneliness and abandonment (n = 14): 'Being on my own was the hardest part.' (male (m), 60-69 y/o); This feeling often rose from the isolation faced in home-quarantine or single hospital rooms, but also from a perceived lack of reliable information regarding the disease.

On the other hand, **resilience** as coping strategy mitigated the experienced stigma, resulting from:



213 Confidence (n = 5) *'I knew I was getting medication; I was sure that would help, otherwise they wouldn't*  
 214 *give it to me. I wasn't worried I would die.'* (m, 60-69 y/o); The elderly putting faith in modern medicine  
 215 or the young relying on their body's defences felt confident they would be spared from adverse  
 216 outcomes.

217 Self-efficacy (n = 2) *'In the beginning it was very hard for me. But as soon as I managed to structure my*  
 218 *day, time just flew by.'* (m, 30-39 y/o); Self-efficacy reflects a person's assumed control over a situation  
 219 and was identified as a rare but resourceful coping strategy.

220 Additionally, participants indicated different ways of **coming to terms** with the undergone infection:  
 221 Pragmatism (n = 2): *'I had it [COVID-19], that's all there is. Now I am cured and immune.'* (f, 70-79 y/o);  
 222 some refused to dwell in the past and did not make a big deal about having had COVID-19.  
 223 Interestingly, this also occurred in one participant that had been hospitalized for a few days.

224 Delayed disclosure (n = 3): *'In the beginning, I didn't want to share with anyone. Afterwards, we talked*  
 225 *about it.'* (f, 70-79 y/o); Participants from different age groups and with different severity of disease  
 226 admitted that they needed some time to process before they were able to confide in someone else.

227 Rationalization (n = 2): *'When I was there, it wasn't known to be a hotspot!'* (m, 50-59 y/o); Some  
 228 participants offered a rationale to justify how they got infected. They emphasized that they did not  
 229 deliberately put themselves and thereby others at risk.

230 Denial or fallacy (n = 1): *'Maybe I didn't have it [COVID-19]. I even know couples, where one had it and*  
 231 *the other didn't'* (m, 50-59 y/o). One participant doubted the established diagnosis.

232 **Financial insecurity** concerned comparatively few self-employed participants. This applied to both  
 233 direct and indirect costs, the latter resulting from a loss of income:

234 Direct costs (n = 2): *'If I hadn't had any savings, it would have been problematic.'* (m, 40-49 y/o);

235 Indirect costs (n = 1): *'I have to earn my money with physical labour. When I can't work, I don't earn*  
 236 *money...'* (m, 50-59 y/o);

237 However, most participants were either employed or received pension and hence costs were covered  
 238 by their health insurance, implying **financial security** (n = 8): *'I was on sick leave and got my loan as*  
 239 *usual.'* (f, 20-29 y/o);

240

## 241 Theme 2: the interpersonal layer

242 Used to a certain level of self-determination and a scope of action, most participants were hit hard by  
 243 the **loss of autonomy**:

244 Loss of independence (n = 5): *'We were all isolated, other people had to take care of us.'* (f, 20-29 y/o);  
 245 Quarantine or being bed-ridden meant depending on others, which was a new situation for many  
 246 participants.

247 Violation of privacy (n = 4): *'I live in a small village and within two hours, everyone knew about it*  
 248 *[COVID-19]'* (f, 20-29 y/o); Transgression of personal boundaries or unauthorized passing of personal  
 249 information left some participants, young and elderly, feeling powerless.

250 Almost every participant suffered some form of **vilification** as perceived or enacted stigma:

251 Blame (n = 9): *'Some people said it is my own fault that I got infected.'* (m, 50-59 y/o). Some patients  
 252 were made responsible for catching SARS-CoV-2 or blamed for unknowingly infecting others. This  
 253 reflects a shift in perspective from passively acquiring a disease to actively spreading it. This change  
 254 from victim to perpetrator was described as particularly hurtful when people had been severely ill from  
 255 COVID-19.

256 Disregard (n = 4): *'They [acquaintances] did not really care about what had happened to me.'* (f, 20-29  
 257 y/o); Lack of concern or misconceptions about what participants were going through left some  
 258 participants frustrated or angry. This was reported by patients with mild symptoms as well as those  
 259 hospitalized.



As mentioned earlier, loneliness and abandonment left participants feeling vulnerable. Additional **avoidance of personal contact** by others when participants were no longer contagious was hence particularly upsetting and by far the most frequently reported form of enacted stigma: (Irrational) fear of infection (n = 27) was presumably the most important driver for the reported behaviour of others: *'Many people withdrew from me for a long time.... I think they were still afraid of getting infected.'* (f, 70-79 y/o);

Participants reported different ways in **dealing with the rejective behaviour** of others: Understanding (n = 10); Most participants could at least partly comprehend and therefore excuse this behaviour: *'I could totally understand their [friends] behaviour. No one knew exactly how long people can transmit COVID.'* (f, 20-29 y/o); Reasoning (n = 2); others tended to argue: *'When they [friends] took a step back, I told them there was no reason, they could hug me, I am no longer contagious.'* (m, 50-59 y/o); Distancing (n = 2) oneself and avoiding emotional involvement and further frustration: *'When I heard about what others said, I just distanced myself from that.'* (m, 50-59 y/o);

Consequently, **personal contact** was much appreciated by all participants and proved one of the most powerful coping strategies: Genuine interest and mindfulness (n = 7) regarding the participants' well-being were key elements: *'It's very important that there are people who care about you and want to know how you are doing. My mum called every day to check on me, that felt good.'* (m, 30-39 y/o); Unaltered interpersonal relationship (n = 4), i.e. discovering that 'nothing had changed' made participants feel relieved: *'With my friends, it is the same way as it has been before.'* (m, 30-38 y/o). Comprehension (n = 4): *'I talked to a friend, and she could totally relate.'* (f, 20-29 y/o). When sharing their stories induced sympathy and comprehension, participants felt that their emotions were acknowledged and legitimate.

### **Theme 3: the communal layer**

The lines between the interpersonal and communal layers are particularly blurry. Thus, codes and subthemes emerging are often similar, yet referring to a different social group. While the interpersonal layer focuses on close personal relationships, the following section refers to more distant contacts or anonymous settings.

**Social rejection** plays an important role in enacted stigma. Again, a potential driver identified was: (irrational) fear of infection (n = 6): *'When I did my groceries and kept a 2 to 3 meters distance, people still told me to go further away.... they even changed the side of the street when they saw me.'* (f, 20-29 y/o);

Additionally, **stereotyping** as perceived stigma was indicated by younger people: Perceived recklessness or carelessness (n = 4): *'Now you [referring to the interviewer] are probably going to say «how on earth could you go skiing, and how could you go there [place where she got infected]?!?', but back then it wasn't that obvious....'* (f, 20-29 y/o); Rumours (n = 2): *'In town, everyone acted like they knew better why I was infected'* (f, 20-29 y/o);

The **reaction** to experienced stigma on the communal level included: Understanding (n = 3): *'I tried to understand their reaction [people at work] and asked myself, how I would have reacted in their place? And honestly, I would keep my distance too. That is probably human.'* (m, 30-39 y/o); Reasoning (n = 2): *'I told them [people in a grocery store] I am no longer contagious and that they don't need to keep a 10-meter distance. In fact, I am less dangerous than other people.'* (f, 20-29 y/o);

305 Resignation (n = 3), i.e. accepting adverse behaviour without arguing: *'I didn't really bother. Couldn't*  
 306 *change it anyway. (...) You have to take it the way it is.'* (m, 40-49 y/o);

307 **Social network and inclusion** turned out as a valuable resource against experienced stigma:  
 308 Sympathy (n = 7): *'So many people called during my absence to make sure I am okay, and they were so*  
 309 *happy to hear from me when I called them back.'* (m, 60-69 y/o). For many participants, it was  
 310 important that others cared about them and felt for them.

311 Solidarity and support (n = 7) from friends or neighbours helped many participants to persevere the  
 312 isolation and let them rest assured that they would receive help if needed: *'Many people from our*  
 313 *village offered help and asked if they could get us anything. I was surprised by their willingness to help.'*  
 314 (f, 50-59 y/o);

#### 316 **Theme 4: the institutional layer**

317 Institutional stigma referred to stigma faced in contact with health authorities, hospital staff, general  
 318 practitioners, and paramedics. Actions directed towards individual participants were labelled **direct**  
 319 **discrimination**, a form of enacted stigma. They resulted mainly from  
 320 Unprofessional treatment (n = 4), which means inappropriate reactions from healthcare workers:  
 321 *'Since I was the second patient in that other hospital, they had a lot of «respect» of me and avoided*  
 322 *coming close to me... that was even worse for me than the [rejecting] behaviour of other people.'* (f,  
 323 20-29 y/o);

324 Structural stigma was also based on regulations affecting COVID-19 patients in general which was  
 325 labelled **indirect discrimination**. Two codes were identified:

326 Lack of accountability (n = 10): In many participant's views, health authorities and other institutions  
 327 failed to take responsibility or lacked transparency; *'They [health authorities] gave us a number where*  
 328 *we could call, but no one ever answered the phone.'* (f, 20-29 y/o);

329 Inconsistency (n = 4): Due to contradictory information, participants lost trust in health officials and  
 330 felt increasingly insecure: *'They [the health authority] told me on the phone my quarantine ended on*  
 331 *Thursday. Then I got the letter from them saying I needed to stay in quarantine for another 2 weeks.'*  
 332 (m, 50-59 y/o);

333 A first, many participants' **reaction to this discriminatory behaviour** was

334 Incomprehension (n = 8): *'I really felt mocked by the health authorities.'* (f, 20-29 y/o); But eventually,  
 335 in retrospect, they often reacted understandingly and forgivingly, which was labelled

336 Leniency (n = 8): *'I guess they [the health authorities] were just overwhelmed.'* (m, 50-59 y/o);

337 Additionally, **receiving professional support** was much appreciated:

338 Appreciation of health-care workers (n = 4): *'He [family doctor] called every day to make sure I was*  
 339 *okay. That felt good.'* (f, 70-79 y/o);

340 Support group (n = 2): *'Is there a self-help group for COVID survivors?'* (m, 50-59 y/o);

#### 342 **Theme 5: the societal layer**

343 This layer characterized **societal norms and values** which are partly internalized by participants.

344 First, COVID-19 was seen as a non-desirable condition (n = 5) and something usually 'others' catch: *'I*  
 345 *was surprised. I never thought we would get it.'* (f, 50-59 y/o);

346 Secondly, even if unaware of carrying an infectious virus, participants perceived themselves as a  
 347 menace to others (n = 10) and public health in general. This was the most sensitive subject during the  
 348 interview: Q: *'Do you happen to know if you accidentally infected somebody?'* A: *'I don't want to talk*  
 349 *about that.'* (m, 50-59 y/o);

350 This led to different reactions, which we subsumed as **harm reduction**:

351 Law-abiding (n=5): Participants emphasized that they stuck to the regulations and thereby avoided  
 352 spreading the disease: *'When we came back [from a hotspot] we stayed at home. So when we finally*  
 353 *knew we had it [COVID-19], at least I didn't feel guilty, because I knew I didn't infect anyone else.'* (f,  
 354 20-29 y/o);

355 Social withdrawal (n = 3): Others reduced social contacts even after COVID-19 was over, often to avoid  
 356 rejective behaviour: *'When my quarantine ended, I didn't ask people to meet. I was afraid they would*  
 357 *react.... in a strange way.'* (f, 20-29 y/o);

358 Hygiene advocacy (n = 3): Others propagated hygiene practices as effort to control the disease: *'I tell*  
 359 *everyone they should wear their face masks.'* (f, 70-79 y/o);

360

## 361 Discussion

### 362 The social impact of COVID-19 in relation to other stigmatizing conditions

363 Regarding the quantitative results, the overall level of experienced stigma was lower in our cohort  
 364 compared to people living with HIV/AIDS or cancer in the United States (29) or Germany (30) (c.f. table  
 365 4). HIV/AIDS is known as a highly stigmatising infection (39), explaining the high level of experienced  
 366 stigma throughout all dimensions. Comparing our results to people with cancer, 'social rejection' and  
 367 'internalized shame' were similar (29) or slightly higher (30) in people with COVID-19. We assume that  
 368 the perceived risk of infecting others with SARS-CoV-2 compared to a non-communicable disease like  
 369 cancer increases feelings of shame and rejection. In contrast to chronic conditions such as HIV/AIDS  
 370 and cancer, stigma towards COVID-19 survivors might decrease over time.

|                      | HIV/AIDS (29)<br>(aggregate means) | Cancer (29)<br>(aggregate means) | COVID-19<br>(aggregate means) | Cancer (30)<br>(means) | COVID-19<br>(means) |
|----------------------|------------------------------------|----------------------------------|-------------------------------|------------------------|---------------------|
| Social rejection     | 19.95                              | 14.87                            | 14.22                         | 1.42                   | 1.58                |
| Internalized shame   | 13.74                              | 8.45                             | 8.39                          | 1.51                   | 1.68                |
| Social isolation     | 17.85                              | 14.64                            | 10.17                         | 1.71                   | 1.45                |
| Financial insecurity | 8.12                               | 5.73                             | 3.51                          | 1.68                   | 1.17                |
| Total score          | <b>59.66</b>                       | <b>43.69</b>                     | <b>36.29</b>                  | <b>1.59</b>            | <b>1.55</b>         |

371 Table 4: Experienced stigma in people living with cancer, HIV/AIDS or after COVID-19

372

### 373 Experienced stigma and applied coping strategies from the inner to the outer societal 374 level

375 On an individual level, factors such as personality, social resources, and economic situation, can either  
 376 enhance or mitigate the impact of stigma. In our cohort, COVID-19-related stigma did usually not  
 377 culminate in financial hardship, in contrast to other, mainly low-and-middle-income countries  
 378 (13,16,40). Some participants suffered from a loss of income while being ill, but none reported loss of  
 379 livelihood or job insecurity.

380 A sudden illness like COVID-19 resulting in fear of death or infecting others, loneliness, and shame  
 381 generates a feeling of vulnerability, which serves as a breeding ground for experiencing stigma. Vice  
 382 versa, stigma seems to increase vulnerability, both in this and other studies (6,21,41,42). Hence,  
 383 COVID-19-related stigma leads to psychological stress and adds to the burden of disease (13,23,41).  
 384 Loss of autonomy, specifically the violation of privacy, was also observed in other settings (13,40,43).  
 385 Participants reported that rumours of someone being infected travelled quickly and confidentiality was  
 386 often breached, even in healthcare facilities. This poses a serious risk for people to hide their condition  
 387 and refrain from test- or healthcare-seeking, favouring the further spread of the virus (16). In contrast,  
 388 the individual's resilience was a valuable source for coping, reflected either by self-confidence or trust

1  
2  
3 389 in others. In other studies, faith in God strengthened the resilience in COVID-19 survivors (23,44).  
4 390 'Coming to terms with the disease' was described as a way of accepting and adapting, which was  
5 391 similarly found by Gopichandran *et al.* (2021) using the terms 'understanding disease characteristics,  
6 392 risk acceptance and self-isolation' (40) and by Bhandari *et al.* (2021) as 'accepting reality' (44). Sharing  
7 393 experiences, often delayed, which is not uncommon after trauma, rationalization to justify former  
8 394 behaviour and, in one case, denial were other coping strategies observed, similarly to the  
9 395 'rationalisation and sharing problems' Bhandari *et al.* (2021) described (44).  
10  
11 396

12  
13 397 On an interpersonal or communal level, stigma was often experienced as vilification including blame,  
14 398 social rejection, and stereotyping. Similarly, Gopichandran *et al.* (2021) (40) noticed an exclusion from  
15 399 essential services such as grocery stores and water taps. Jiang *et al.* (2021) (11) found that 5% of  
16 400 respondents lived in communities that rejected people with COVID-19. Imran *et al.* (2020) (13)  
17 401 reported social rejection of whole families if one member fell ill. Amir (2020) (12) described how  
18 402 patients were treated as outcasts, given bad names and blamed for spreading the disease. Our data  
19 403 suggests that triggers for discriminating of COVID-19 survivors were a general fear of getting infected  
20 404 and noticing presumably irresponsible behaviour of others, often based on misconceptions regarding  
21 405 modes of transmission. Since the virus was perceived as lethal, social rejection seemed reasonable to  
22 406 keep supposedly infectious people at a distance (12,13,16,25,43). In some studies, stigmatizing  
23 407 attitudes were linked to experienced vulnerability, poor education and conflicting information in the  
24 408 media (17,22,24,45), pointing out the necessity of careful communication and precise information  
25 409 about COVID-19 (28). On the other hand, a strong, solidary social network and sound relationships  
26 410 were valuable resources to cope with stigma (23,40,44,46). This might work in both directions: For  
27 411 those not infected, COVID-19 is not reduced to a faceless, dangerous virus, but connected to a human  
28 412 being (47). This can induce a comprehensive and mindful attitude that prevents stigmatization and  
29 413 supports those infected. 'Humanizing' COVID-19 has been insinuated as a way to end stigma, either by  
30 414 involving celebrities or sharing narratives from affected people (15,17,48).  
31  
32 415

33  
34  
35  
36 416 Stigma experienced on an institutional level included both direct and indirect discrimination. The  
37 417 former resulted from inappropriate treatment by professionals, such as negligence of patients or  
38 418 compelling them to leave the hospital. Difficulties in accessing healthcare, poor services and negligence  
39 419 were also found in other settings (18,40,41). Indirect discrimination referred to a lack of accountability  
40 420 when health authorities were presumably too overwhelmed to take over responsibility. These  
41 421 experiences elicited either incomprehension or leniency in participants and show the necessity for  
42 422 institutions to be transparent (25) and give consistent instructions to preserve people's confidence and  
43 423 compliance.  
44  
45 424

46  
47 425 On a societal level, health-related stigma is often associated with certain norms and values. For  
48 426 example, people living with HIV/AIDS are often perceived as 'dirty' or 'immoral' (49) and some types  
49 427 of cancer are linked to an unhealthy lifestyle or risk behaviour (50). In contrast to those conditions,  
50 428 COVID-19 is an airborne infection with high transmissibility, meaning that one person infects about  
51 429 three others (51). We noticed that COVID-19 survivors often felt like a source of infection, i.e. a menace  
52 430 to others and were ashamed and eager to reduce further harm. The findings indicate a change of  
53 431 perspective from passively 'catching the virus'—as is commonly used in other infections—to actively  
54 432 'spreading the virus', even if this happened unwittingly. The change equals an unprecedented shift  
55 433 within social norms from 'victim' to 'perpetrator'. This public attitude is also reflected in editorial  
56 434 cartoons blaming certain groups or behaviour for the transmission of COVID-19 (24), which does not  
57 435 only add to the psychological stress in affected people, but also to a polarization within society. As a  
58 436 coping strategy, participants reacted with social withdrawal, a strictly law-abiding or hygiene  
59 437 advocating behaviour.



1  
2  
3  
4  
5  
6  
7  
8  
9  
10  
11  
12  
13  
14  
15  
16  
17  
18  
19  
20  
21  
22  
23  
24  
25  
26  
27  
28  
29  
30  
31  
32  
33  
34  
35  
36  
37  
38  
39  
40  
41  
42  
43  
44  
45  
46  
47  
48  
49  
50  
51  
52  
53  
54  
55  
56  
57  
58  
59  
60

438  
439 The experienced stigma and applied coping strategies within the respective social layer are depicted  
440 as comprehensive framework in figure 2. Stigma experienced at the individual level is shown at the  
441 bottom of the framework, followed by the interpersonal, communal, institutional, and finally the  
442 societal level.

443

444 *Figure 2: Comprehensive framework of experienced stigma and applied coping strategies, stratified by societal layer*

445

### 446 Intersectional stigma

447 As a social phenomenon, stigma can never be assessed detached from other social conditions, often  
448 mirroring power differences between groups. Most studies about COVID-19-related stigma suggest a  
449 higher prevalence among the elderly or patients with comorbidities, since they are most affected by  
450 the disease (25,41,48). However, in our study, young to middle-aged participants reported the highest  
451 level of experienced stigma. This might result from the shift from 'victim' to 'perpetrator' mentioned  
452 earlier. Those participants who were seriously ill often received sympathy from their social  
453 environment and were seen as 'victims'. In contrast, young people were often asymptomatic and  
454 regarded as 'super-spreaders' (52), i.e. drivers of the pandemic. Similarly, a recent study from Israel  
455 found negative age-related stereotypes associated with younger people (53). Reports from illegal  
456 parties despite the curfew added to a reckless and careless stereotype of young people (54). We  
457 assume stereotyping also caused experienced stigma in participants with travel history (55): Those  
458 coming back from a skiing trip in a hotspot were seen as a major source of the pandemic and perceived  
459 as reckless, putting fun above health. Similarly, the patient's **origin** was also connected with stigma in  
460 other settings, e.g. regarding migrant workers in Delhi, India, residing in Haryana (11,16,25,48).  
461 However, since all our participants had the same cultural background, we were not able to assess  
462 different ethnicities in our cohort. In contrast to other studies, we did not find any difference in **gender**  
463 (13,25,41,56,57) or **education** (56–58) regarding experienced stigma. Previous research identified an  
464 association between **poverty** (16,40) or occupational status (56) and experienced stigma, assuming a  
465 mutual influence: COVID-19 is more easily spread in over-crowded, poorer areas; on the other hand,  
466 COVID-19 can lead to a loss of livelihood of those infected. We did not collect data on the economic  
467 situation, but used the occupational status as a proxy, which revealed no significant difference  
468 between the groups. However, this variable might fail to reflect more subtle socioeconomic differences  
469 between participants. Similar to Gopichandran et al. (2021) (40), our qualitative data suggested that  
470 experienced stigma differs with **residential site**: participants in more anonymous urban apartments  
471 experienced less stigma than those living in rural areas, where residents know each other and word by  
472 mouth travels quickly. On the other hand, participants from rural areas also reported more neighbourly  
473 support.

### 474 Limitations, reflexivity, and possible bias

475 Regarding the quantitative part, a questionnaire designed for people living with HIV/AIDS or cancer  
476 was applied in the absence of one specifically designed for experienced stigma in COVID-19 survivors.  
477 Since these conditions differ in many ways, the questionnaire used might fail to reflect certain  
478 dimensions of COVID-19 related stigma. Moreover, the response rate to the questionnaire was low,  
479 probably due to the sensitive nature of the study and the single-centre study design, resulting in a  
480 comparatively low quantitative sample size.

481 Regarding the qualitative part, the interviews were conducted by phone, so physical appearance and  
482 body language did not influence the data, in contrast to face-to-face interviews. This can work in both

1  
2  
3 483 directions: either participants appreciated the more anonymous atmosphere to share private  
4 484 information, or they would have preferred a more personal and intimate setting. Talking to a medical  
5 485 doctor (LP), participants are used to sharing physical complaints rather than social experiences such as  
6 486 stigma. Participants often had the impression that their narratives were inappropriate or not of  
7 487 interest. Although participants were encouraged to share their stories, an expectation bias cannot be  
8 488 excluded. Since stigma is a sensitive topic, it is easily subjected to a social-desirability bias and hence  
9 489 bearing the risk of the respondents' inclination towards euphemized answers. Furthermore, a recall  
10 490 bias must be considered due to the retrospective character of the study.  
11 491 Ultimately, those participants who volunteered to be interviewed were mostly of German origin. The  
12 492 requirement of an advanced level of German and the single-centre study design might have limited  
13 493 the diversity of study participants and caused a selection bias, since the sample is unlikely to represent  
14 494 all cultural groups and ethnicities living in Germany.  
15  
16  
17  
18 495

## 19 496 **Conclusion and implications for stakeholders**

20  
21 497 Around the globe, stigma is a social phenomenon that cuts through all layers of society. It is intertwined  
22 498 with or aggravated by social factors that can lead to 'othering' and discrimination. It can limit access  
23 499 to healthcare and other public services and can therefore be seen as a social determinant of health  
24 500 equity and a hidden burden of disease. Stigma arises from perceived careless behaviour and irrational  
25 501 fear of infection, which emerge from misconceptions about the disease. Information about COVID-19  
26 502 in social media is often incorrect (59) or biased (24) and people have difficulties finding reliable sources  
27 503 (11) to distinguish between fake and fact. In line with previous research (28), we emphasize the need  
28 504 of providing accurate information and exposing misinformation on disease prevention and treatment  
29 505 to end COVID-19 related stigma.  
30  
31

32 506

33 507

## 34 508 **Acknowledgements**

35  
36  
37 509 We thank Michael Krupka for valuable input and continuous support and Métrey Tiv for reviewing the  
38 510 interview guide.  
39  
40  
41  
42  
43  
44  
45  
46  
47  
48  
49  
50  
51  
52  
53  
54  
55  
56  
57  
58  
59  
60

1  
2  
3  
4 511 **Statements**

5 512

6  
7 513 a. Contributorship

- 8  
9 514 • Conceptualisation: LP, BG  
10 515 • Methodology: LP  
11 516 • Data acquisition: LP  
12 517 • Initial analysis: LP  
13 518 • Interpretation of data: LP, SB, CB, BG  
14 519 • Writing - original draft: LP  
15 520 • Visualization: LP  
16 521 • Writing - review and editing: SB, CB, BG  
17 522 • Final approval: LP, SB, CB, BG  
18 523 • Accountability: LP, SB, CB, BG

19 524

20 525

21 526 b. Funding with award/grant number

22 527 There was no funding involved in this study.

23 528

24 529

25 530 c. Competing interests

26 531 The authors declare that there is no conflict of interest.

27 532

28 533

29 534 d. Data sharing statement

30 535 Data (both quantitative and original German qualitative data) are available on request.

31 536

32 537 e. Ethical approval

33 538 The study was approved by the ethical board of the University of Ulm (No. 315/20). Prior to inclusion,  
34 539 an informed consent was obtained from all participants.



540 **References**

- 541 1. Goffman E. *Stigma: Notes on the Management of Spoiled Identity*. New York: Simon & Schuster, Inc; 1963.
- 542 2. Bos AER, Pryor JB, Reeder GD, Stutterheim SE. *Stigma: Advances in Theory and Research*. *Basic Appl Soc Psych* [Internet]. 2013 Jan 4 [cited 2021 Mar 15];35(1):1–9. Available from: <https://www.tandfonline.com/doi/full/10.1080/01973533.2012.746147>
- 543 3. MacLean R. Resources to address stigma related to sexuality, substance use and sexually transmitted and blood-borne infections. *Can Commun Dis Rep* [Internet]. 2018 Feb 1 [cited 2021 Sep 27];44(2):62–7. Available from: <https://pubmed.ncbi.nlm.nih.gov/29770101/>
- 544 4. WHO. *Undefined and Hidden Burden of Mental Health Problems* [Internet]. Geneva; 1999. Available from: <https://books.google.de/books?id=As33jwEACAAJ>
- 545 5. Hatzenbuehler ML, Phelan JC, Link BG. Stigma as a Fundamental Cause of Population Health Inequalities. *Am J Public Health* [Internet]. 2013 May [cited 2021 Sep 27];103(5):813. Available from: </pmc/articles/PMC3682466/>
- 546 6. Campo-Arias A, Pedrozo-Pupo JC, Caballero-Domínguez CC. Relation of perceived discrimination with depression, insomnia and post-traumatic stress in COVID-19 survivors. *Psychiatry Res*. 2022 Jan 1;307.
- 547 7. Stangl AL, Earnshaw VA, Logie CH, Van Brakel W, Simbayi LC, Barré I, et al. The Health Stigma and Discrimination Framework: A global, crosscutting framework to inform research, intervention development, and policy on health-related stigmas. *BMC Med* [Internet]. 2019 Feb 15 [cited 2021 Mar 15];17(1). Available from: <https://pubmed.ncbi.nlm.nih.gov/30764826/>
- 548 8. UNICEF. *COVID-19 & stigma: How to prevent and address social stigma in your community | UNICEF Sudan* [Internet]. [cited 2021 Sep 27]. Available from: <https://www.unicef.org/sudan/covid-19-stigma-how-prevent-and-address-social-stigma-your-community>
- 549 9. Bruns DP, Kraguljac NV, Bruns TR. COVID-19: Facts, Cultural Considerations, and Risk of Stigmatization. *J Transcult Nurs* [Internet]. 2020 Jul 1 [cited 2021 Mar 15];31(4):326–32. Available from: <http://journals.sagepub.com/doi/10.1177/1043659620917724>
- 550 10. Li W, Yang Y, Ng CH, Zhang L, Zhang Q, Cheung T, et al. Global imperative to combat stigma associated with the coronavirus disease 2019 pandemic. *Psychol Med* [Internet]. 2021 Aug 1 [cited 2021 Sep 27];51(11):1957–8. Available from: <https://www.cambridge.org/core/journals/psychological-medicine/article/global-imperative-to-combat-stigma-associated-with-the-coronavirus-disease-2019-pandemic/E46F6C71A680D1896B668C5794D98354>
- 551 11. Jiang T, Lin L, Zhong Y, Wang X, Zhu H. COVID-19-related stigma and its' influencing factors: a rapid nationwide study in China. 2020 Aug 28 [cited 2021 Sep 27]; Available from: <https://www.researchsquare.com>
- 552 12. Amir K. COVID-19 and its related stigma: A qualitative study among survivors in Kampala, Uganda. *Stigma Heal*. 2021;
- 553 13. Imran N, Afzal H, Aamer I, Hashmi A, Shabbir B, Asif A, et al. Scarlett letter: A study based on experience of stigma by COVID-19 patients in quarantine. *Pakistan J Med Sci* [Internet]. 2020 [cited 2021 Mar 15];36(7):1471–7. Available from: </pmc/articles/PMC7674879/>
- 554 14. Dye T, Alcantara L, Siddiqi S, Barbosu M, Sharma S, Panko T, et al. Risk of COVID-19-related bullying, harassment and stigma among healthcare workers: an analytical cross-sectional global study. *BMJ Open* [Internet]. 2020 Dec 30 [cited 2021 Sep 27];10(12). Available from: <https://pubmed.ncbi.nlm.nih.gov/33380488/>
- 555 15. Chii C, Hospital C, Permaisuri R, Xin B, Lim J, Raja H, et al. Experiences of Social Stigma Among Patients Tested Positive for COVID-19 and Their Family Members: A Qualitative Study. 2021 Feb 8 [cited 2021 Sep 27]; Available from: <https://www.researchsquare.com>
- 556 16. Bhanot D, Singh T, Verma S, Sharad S. Stigma and Discrimination During COVID-19 Pandemic. *Front public Heal* [Internet]. 2021 Jan 12 [cited 2021 Sep 27];8. Available from: <https://pubmed.ncbi.nlm.nih.gov/33585379/>
- 557 17. Chen Y, Jin J, Zhang X, Zhang Q, Dong W, Chen C. Reducing Objectification Could Tackle Stigma in the COVID-19 Pandemic: Evidence From China. *Front Psychol* [Internet]. 2021 May 28 [cited 2021 Sep 27];12:664422. Available from: </pmc/articles/PMC8193049/>
- 558 18. Singh S, Bhutani S, Fatima H. Surviving the stigma: lessons learnt for the prevention of COVID-19 stigma and its mental health impact. *Ment Heal Soc Incl*. 2020 Aug 21;24(3):145–9.
- 559 19. Guo M, Kong M, Shi W, Wang M, Yang H. Listening to COVID-19 survivors: what they need after early discharge from hospital - a qualitative study. <https://doi.org/10.1080/1748263120222030001> [Internet]. 2022 [cited 2022 Mar 2];17(1). Available from:

- 1  
2  
3 597 <https://www.tandfonline.com/doi/abs/10.1080/17482631.2022.2030001>
- 4 598 20. Toulabi T, Pour FJ, Veiskramian A, Heydari H. Exploring COVID-19 patients' experiences of psychological  
5 599 distress during the disease course: a qualitative study. *BMC Psychiatry*. 2021 Dec 1;21(1).
- 6 600 21. Sousa AR de, Cerqueira SSB, Santana T da S, Suto CSS, Almeida ES, Brito LS, et al. Stigma experienced by  
7 601 men diagnosed with COVID-19. *Rev Bras Enferm*. 2021;75Suppl 1(Suppl 1):e20210038.
- 8 602 22. Habibid MA, Dayyabid FM, Iliyasu G, Habib AG. Knowledge, attitude and practice survey of COVID-19  
9 603 pandemic in Northern Nigeria. 2021; Available from: <https://doi.org/10.1371/journal.pone.0245176>
- 10 604 23. Adom D, Mensah J, Osei M. The psychological distress and mental health disorders from COVID-19  
11 605 stigmatization in Ghana. *Soc Sci Humanit open [Internet]*. 2021 [cited 2021 Sep 27];4(1):100186.  
12 606 Available from: <https://pubmed.ncbi.nlm.nih.gov/34250461/>
- 13 607 24. Labbé F, Pelletier C, Bettinger JA, Curran J, Graham JE, Greyson D, et al. Stigma and blame related to  
14 608 COVID-19 pandemic: A case-study of editorial cartoons in Canada. *Soc Sci Med*. 2022 Mar 1;296.
- 15 609 25. Roelen K, Ackley C, Boyce P, Farina N, Ripoll S. COVID-19 in LMICs: The Need to Place Stigma Front and  
16 610 Centre to Its Response. *Eur J Dev Res [Internet]*. 2020 Dec 21 [cited 2021 Mar 15];32(5):1592–612.  
17 611 Available from: <http://link.springer.com/10.1057/s41287-020-00316-6>
- 18 612 26. He J, He L, Zhou W, Nie X, He M. Discrimination and social exclusion in the outbreak of COVID-19. *Int J  
19 613 Environ Res Public Health*. 2020 Apr 2;17(8).
- 20 614 27. Mlouki I, Zammit N, Ghammem | Rim, Sihem |, Fredj B, Bannour R, et al. Validity and reliability of a  
21 615 modified short version of a stigma scale for use among Tunisian COVID-19 patients after quarantine: A  
22 616 cross-sectional study. *Heal Sci Reports [Internet]*. 2022 Mar 1 [cited 2022 Mar 2];5(2):e520. Available  
23 617 from: <https://onlinelibrary.wiley.com/doi/full/10.1002/hsr2.520>
- 24 618 28. Ugidos C, López-Gómez A, Castellanos MÁ, Saiz J, González-Sanguino C, Ausín B, et al. Evolution of  
25 619 intersectional perceived discrimination and internalized stigma during COVID-19 lockdown among the  
26 620 general population in Spain. *Int J Soc Psychiatry*. 2022 Feb 1;68(1):55–63.
- 27 621 29. Fife BL, Wright ER. The dimensionality of stigma: A comparison of its impact on the self of persons with  
28 622 HIV/AIDS and cancer. Vol. 41, *Journal of Health and Social Behavior*. American Sociological Association;  
29 623 2000. p. 50–67.
- 30 624 30. Eichhorn S, Mehnert A, Stephan M. [German Version of the Social Impact Scale (SIS-D)--Pilot Testing of  
31 625 an Instrument for Measuring Experienced Stigmatization in a Sample of Cancer Patients]. *Psychother  
32 626 Psychosom Med Psychol [Internet]*. 2015 May 1 [cited 2021 Sep 27];65(5):183–90. Available from:  
33 627 <https://pubmed.ncbi.nlm.nih.gov/25794353/>
- 34 628 31. Miles, M.B & Huberman A. An expanded sourcebook: *Qualitative data analysis (2nd Edition)*. 2nd Editio.  
35 629 Miles MB, Huberman AM, editors. Sage Publications. London: SAGE Publications; 1994. p. 56-57.
- 36 630 32. Richards L, Morse JM, Richards C. README FIRST for a User's Guide to Qualitative Methods. 2007. p.  
37 631 135-138.
- 38 632 33. Grbich C. *Qualitative data analysis : an introduction*. SAGE Publications; 2007. p. 21-22.
- 39 633 34. Dey I. *Grounding grounded theory : guidelines for qualitative inquiry*. Academic Press; 1999. 95 p.
- 40 634 35. Rossman GB, Rallis SF. *An Introduction to Qualitative Research: Learning in the Field*. An Introd to Qual  
41 635 Res Learn F. 2020 Jan 20;
- 42 636 36. Charmaz K. *Constructing Grounded Theory: A Practical Guide through Qualitative Analysis*. SAGE  
43 637 Publications; 2006. (Introducing Qualitative Methods series).
- 44 638 37. Graneheim UH, Lundman B. Qualitative content analysis in nursing research: concepts, procedures and  
45 639 measures to achieve trustworthiness. *Nurse Educ Today [Internet]*. 2004 [cited 2022 Mar 3];24(2):105–  
46 640 12. Available from: <https://pubmed.ncbi.nlm.nih.gov/14769454/>
- 47 641 38. Marshall JC, Murthy S, Diaz J, Adhikari N, Angus DC, Arabi YM, et al. A minimal common outcome  
48 642 measure set for COVID-19 clinical research. *Lancet Infect Dis [Internet]*. 2020 Aug 1 [cited 2022 Mar  
49 643 1];20(8):e192–7. Available from: <http://www.thelancet.com/article/S1473309920304837/fulltext>
- 50 644 39. Mahajan AP, Sayles JN, Patel VA, Remien RH, Sawires SR, Ortiz DJ, et al. Stigma in the HIV/AIDS  
51 645 epidemic: A review of the literature and recommendations for the way forward. *AIDS [Internet]*. 2008  
52 646 [cited 2022 Mar 3];22(Suppl 2):S67. Available from: [/pmc/articles/PMC2835402/](https://pubmed.ncbi.nlm.nih.gov/1762835402/)
- 53 647 40. Gopichandran V, Subramaniam S. A qualitative inquiry into stigma among patients with Covid-19 in  
54 648 Chennai, India. *Indian J Med Ethics [Internet]*. 2021 Jul 1 [cited 2021 Sep 27];VI(3):1–21. Available from:  
55 649 <https://pubmed.ncbi.nlm.nih.gov/34287199/>
- 56 650 41. Li J, Liang W, Yuan B, Zeng G. Internalized Stigmatization, Social Support, and Individual Mental Health  
57 651 Problems in the Public Health Crisis. *Int J Environ Res Public Health [Internet]*. 2020 [cited 2021 Sep  
58 652 27];17(12):1–14. Available from: [/pmc/articles/PMC7345765/](https://pubmed.ncbi.nlm.nih.gov/34287199/)
- 59 653 42. Sahoo S, Mehra A, Suri V, Malhotra P, Yaddanapudi LN, Dutt Puri G, et al. Lived experiences of the  
60 654 corona survivors (patients admitted in COVID wards): A narrative real-life documented summaries of

1  
2  
3  
4  
5  
6  
7  
8  
9  
10  
11  
12  
13  
14  
15  
16  
17  
18  
19  
20  
21  
22  
23  
24  
25  
26  
27  
28  
29  
30  
31  
32  
33  
34  
35  
36  
37  
38  
39  
40  
41  
42  
43  
44  
45  
46  
47  
48  
49  
50  
51  
52  
53  
54  
55  
56  
57  
58  
59  
60

- 655 internalized guilt, shame, stigma, anger. *Asian J Psychiatr*. 2020 Oct 1;53:102187.
- 656 43. Son H-M, Choi W-H, Hwang Y-H, Yang H-R. The Lived Experiences of COVID-19 Patients in South Korea:  
657 A Qualitative Study. *Int J Environ Res Public Health* [Internet]. 2021;18(14). Available from:  
658 <https://www.mdpi.com/1660-4601/18/14/7419>
- 659 44. Bhandari S, Khakha D, Ajesh Kumar T, Verma R. "I might catch this infection again and this time i will  
660 not survive" - A qualitative study on lived-in experiences and coping strategies of COVID-19-positive  
661 individuals in India. *Indian J Psychiatry* [Internet]. 2021 Nov 1 [cited 2022 Mar 2];63(6):560–7. Available  
662 from:  
663 [https://journals.lww.com/indianjpsychiatry/Fulltext/2021/63060/\\_I\\_might\\_catch\\_this\\_infection\\_again  
664 \\_and\\_this\\_time.8.aspx](https://journals.lww.com/indianjpsychiatry/Fulltext/2021/63060/_I_might_catch_this_infection_again_and_this_time.8.aspx)
- 665 45. Moradi Y, Mollazadeh F, Karimi P, Hosseingholipour K, Baghaei R. Psychological disturbances of  
666 survivors throughout COVID-19 crisis: a qualitative study. *BMC Psychiatry*. 2020 Dec 1;20(1).
- 667 46. Heijnders M, Van Der Meij S. The fight against stigma: an overview of stigma-reduction strategies and  
668 interventions. *Psychol Health Med* [Internet]. 2006 [cited 2021 Sep 27];11(3):353–63. Available from:  
669 <https://pubmed.ncbi.nlm.nih.gov/17130071/>
- 670 47. Logie CH. Lessons learned from HIV can inform our approach to COVID-19 stigma. *J Int AIDS Soc*  
671 [Internet]. 2020 May 1 [cited 2021 Sep 27];23(5):e25504. Available from:  
672 <https://onlinelibrary.wiley.com/doi/full/10.1002/jia2.25504>
- 673 48. Asadi-Aliabadi M, Tehrani-Banihashemi A, Moradi-Lakeh M. Stigma in COVID-19: A barrier to seek  
674 medical care and family support. *Med J Islam Repub Iran* [Internet]. 2020 Oct 30 [cited 2021 Sep 27];34.  
675 Available from: <https://pubmed.ncbi.nlm.nih.gov/33315991/>
- 676 49. Logie CH, James LI, Tharao W, Loutfy MR. HIV, gender, race, sexual orientation, and sex work: A  
677 qualitative study of intersectional stigma experienced by HIV-positive women in Ontario, Canada. *PLoS*  
678 *Med*. 2011 Nov;8(11).
- 679 50. Chapple A, Ziebland S, McPherson A. Stigma, shame, and blame experienced by patients with lung  
680 cancer: qualitative study. *BMJ* [Internet]. 2004 Jun 19 [cited 2021 Oct 19];328(7454):1470–3. Available  
681 from: <https://pubmed.ncbi.nlm.nih.gov/15194599/>
- 682 51. D'Arienzo M, Coniglio A. Assessment of the SARS-CoV-2 basic reproduction number, R0, based on the  
683 early phase of COVID-19 outbreak in Italy. *Biosaf Heal* [Internet]. 2020 Jun 1 [cited 2021 Oct  
684 19];2(2):57. Available from: [/pmc/articles/PMC7148916/](https://pubmed.ncbi.nlm.nih.gov/33315991/)
- 685 52. Lewis D. Superspreading drives the COVID pandemic - and could help to tame it. *Nature*. 2021 Feb  
686 1;590(7847):544–6.
- 687 53. Werner P, AboJabel H, Tur-Sinai A. Ageism towards older and younger people in the wake of the  
688 COVID-19 outbreak. *Maturitas* [Internet]. 2022 Mar 1 [cited 2022 Mar 3];157:1–6. Available from:  
689 <https://pubmed.ncbi.nlm.nih.gov/35120667/>
- 690 54. Germany: Hamburg police clear neighborhood after thousands show up to party | News | DW |  
691 30.05.2021 [Internet]. [cited 2021 Sep 27]. Available from: [https://www.dw.com/en/germany-  
692 hamburg-police-clear-neighborhood-after-thousands-show-up-to-party/a-57717566](https://www.dw.com/en/germany-hamburg-police-clear-neighborhood-after-thousands-show-up-to-party/a-57717566)
- 693 55. 'Everyone was drenched in the virus': was this Austrian ski resort a Covid-19 ground zero? |  
694 Coronavirus | The Guardian [Internet]. [cited 2021 Sep 27]. Available from:  
695 [https://www.theguardian.com/world/2020/sep/05/everyone-was-drenched-in-the-virus-was-this-  
696 austrian-ski-resort-a-covid-19-ground-zero](https://www.theguardian.com/world/2020/sep/05/everyone-was-drenched-in-the-virus-was-this-austrian-ski-resort-a-covid-19-ground-zero)
- 697 56. Yuan Y, Zhao YJ, Zhang QE, Zhang L et al. COVID-19-related stigma and its sociodemographic correlates:  
698 a comparative study. *Global Health* [Internet]. 2021 Dec 1 [cited 2021 Sep 27];17(1). Available from:  
699 <https://pubmed.ncbi.nlm.nih.gov/33962651/>
- 700 57. Dar SA, Khurshid SQ, Wani ZA, Khanam A, Haq I, Shah NN, et al. Stigma in coronavirus disease-19  
701 survivors in Kashmir, India: A cross-sectional exploratory study. *PLoS One*. 2020 Nov 1;15(11  
702 November).
- 703 58. Almoayad F, Mahboub S, Amer L Bin, Alrabiah A, Alhashem A. Stigmatisation of covid-19 in Riyadh,  
704 Saudi Arabia a cross-sectional study. *Sultan Qaboos Univ Med J*. 2021 Nov 25;21(4):525–31.
- 705 59. Li H, Bailey A, Huynh D, Chan J. YouTube as a source of information on COVID-19: a pandemic of  
706 misinformation? *BMJ Glob Heal* [Internet]. 2020 May 14 [cited 2021 Sep 27];5(5). Available from:  
707 <https://pubmed.ncbi.nlm.nih.gov/32409327/>

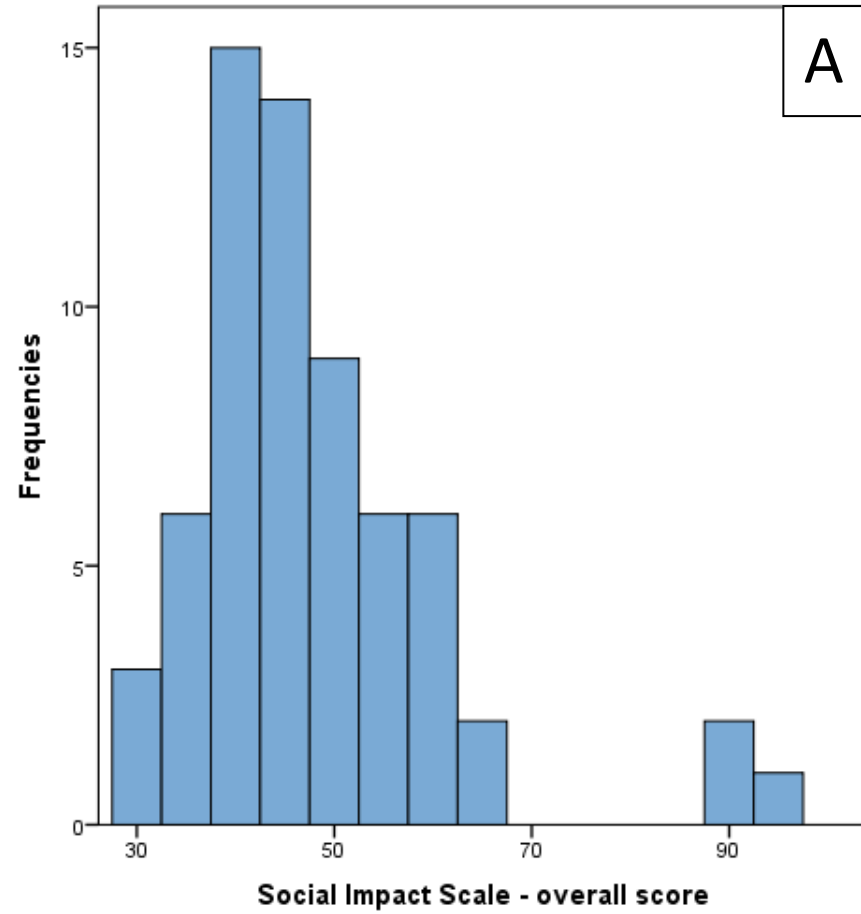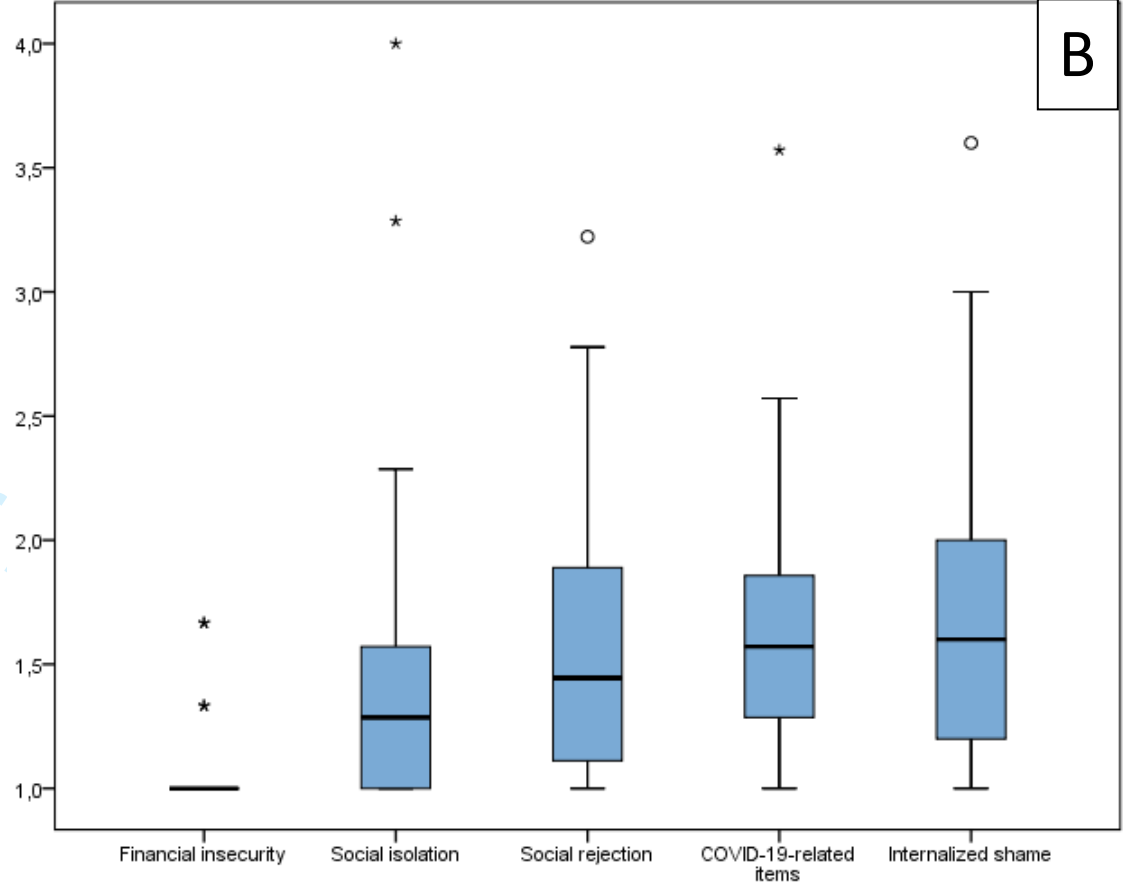

## Experienced stigma

## Applied coping strategies

1  
2  
3  
4  
5  
6  
7  
8  
9  
10  
11  
12  
13  
14  
15  
16  
17  
18  
19  
20  
21  
22  
23  
24  
25  
26  
27  
28  
29  
30  
31  
32  
33  
34  
35  
36  
37  
38  
39  
40  
41

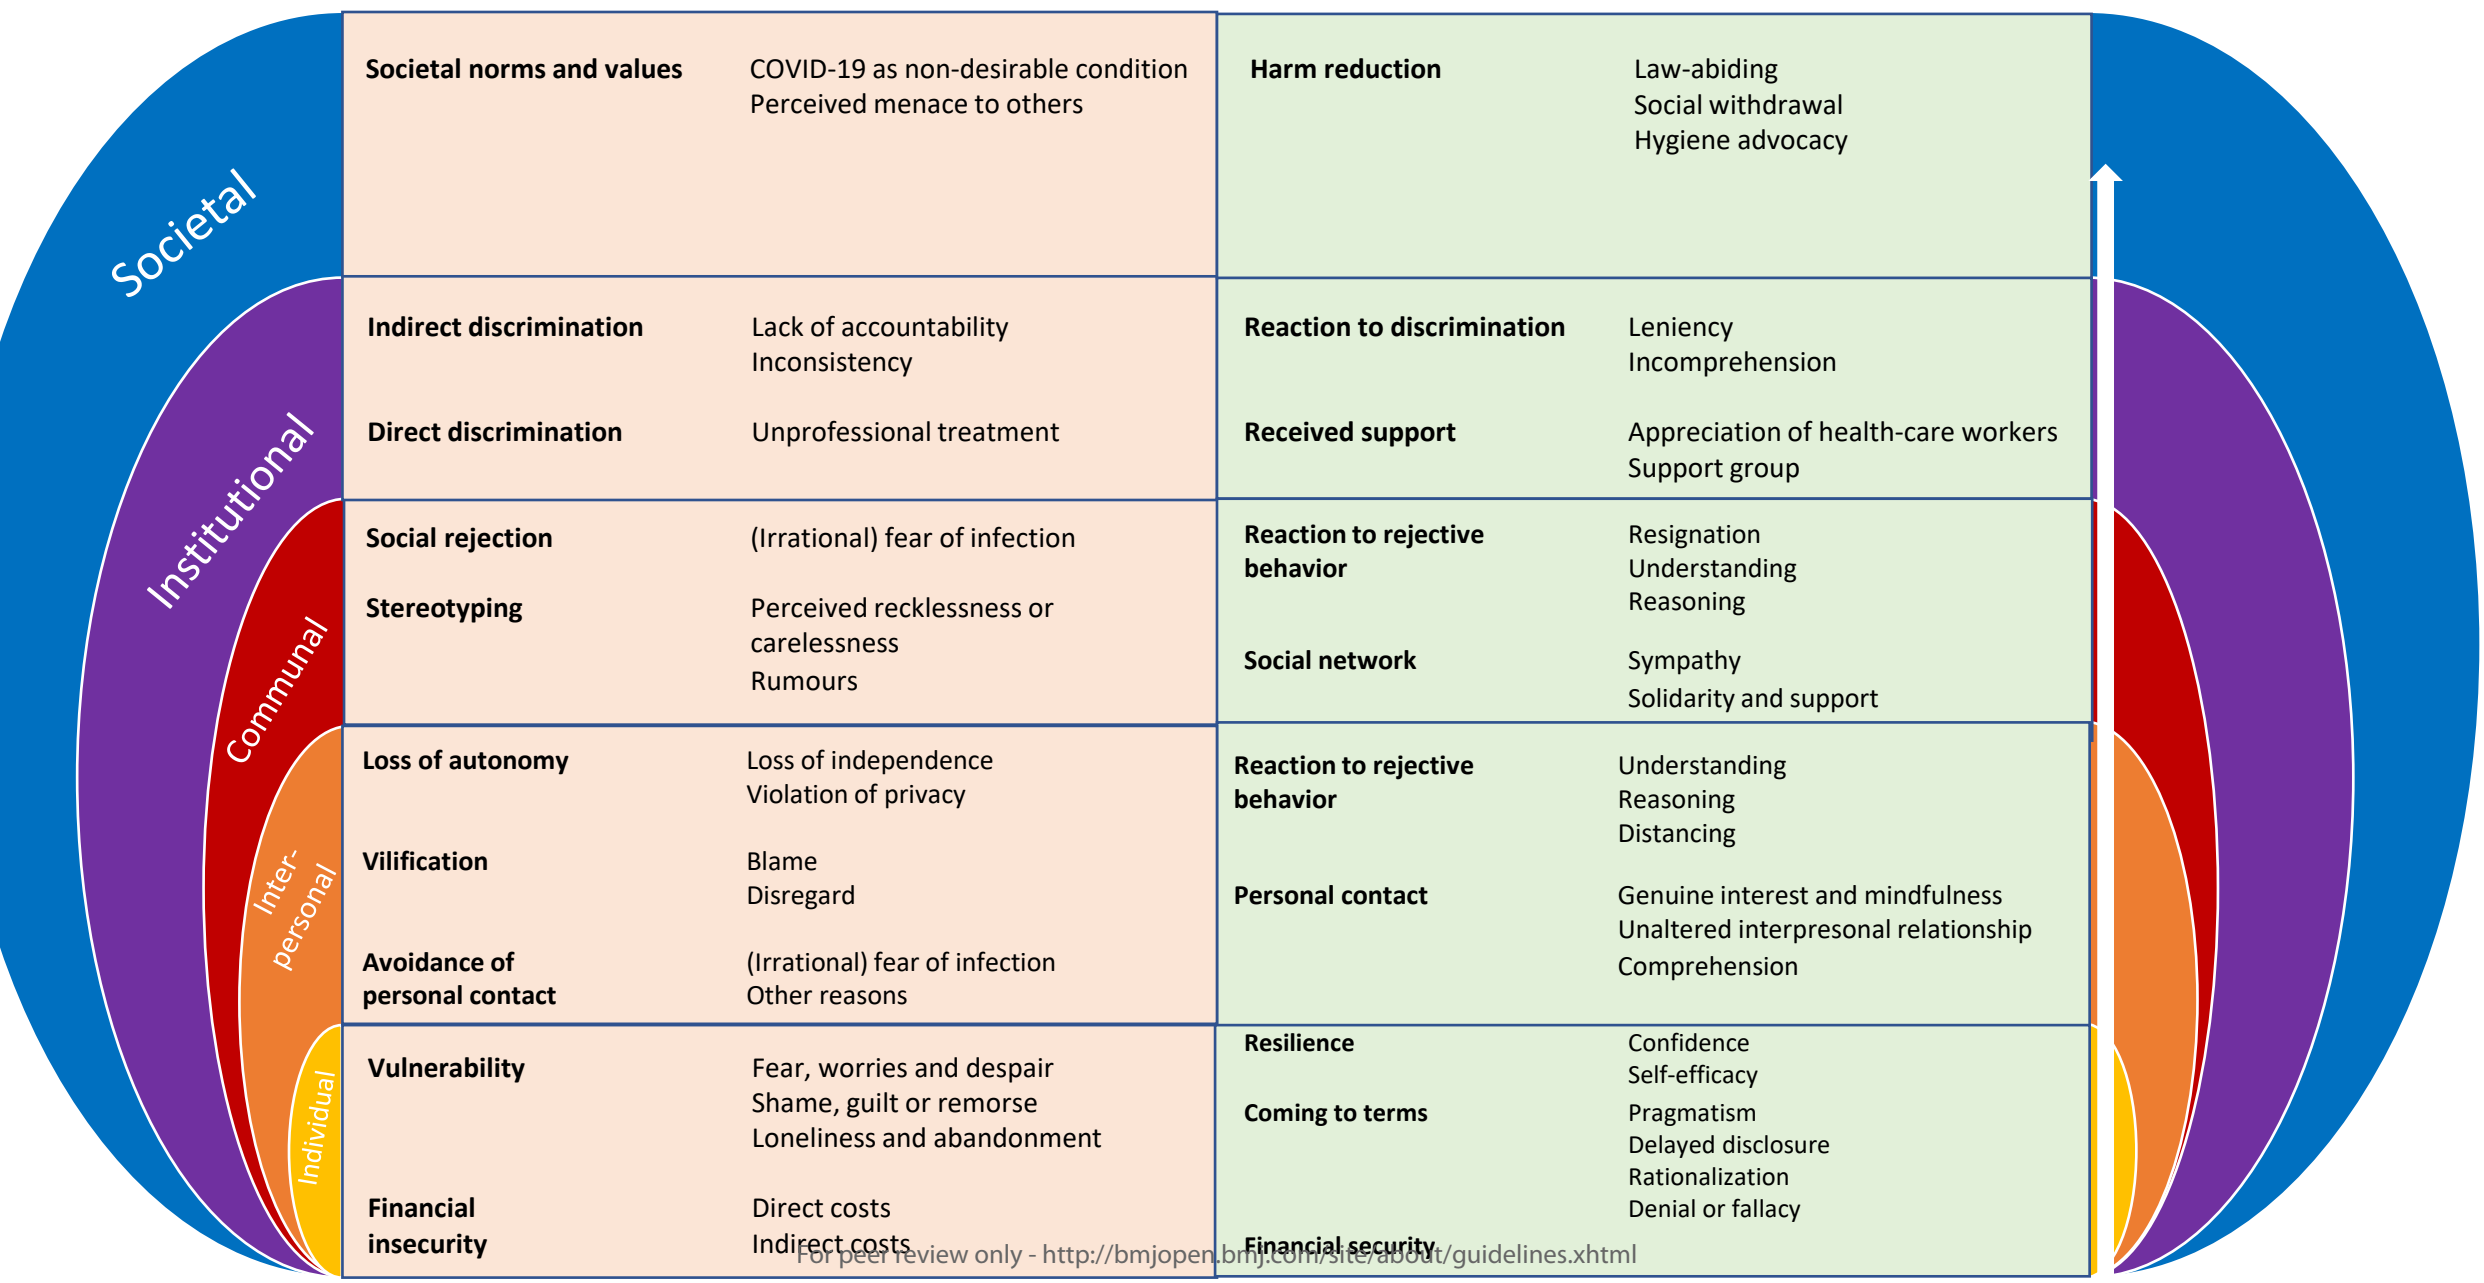

## Supplementary material

S1) COVID-19-related questions added to the Social Impact Scale

S2) Interview guide

S3) Table with quotes for experienced stigma

S4) Table with quotes for applied coping strategies

## S1) Additional COVID-19-related questions (additional to the Social Impact Scale)

1. Ich hatte die Befürchtung, dass andere aufgrund meiner längeren Abwesenheit meine Erkrankung erahnen konnten.  
1. I was worried that others might suspect my illness due to my long absence.
2. Ich habe mich schuldig gefühlt, dass ich (eventuell) andere angesteckt habe, auch wenn dies unwissentlich geschah.  
2. I feel guilty because I accidentally might have infected others.
3. Als ich auf meine krankheitsbedingte Abwesenheit angesprochen wurde, habe ich offen gesagt, dass ich an COVID19 erkrankt war.  
3. When I was asked about my absence, I admitted that I had COVID-19.
4. Als ich nach meiner Erkrankung zurück in die Arbeit kam oder mich mit Freunden getroffen habe, hatte ich Sorge, wie meine Kollegen/Freunde wohl auf mich reagieren würden.  
4. When I met colleagues or friends after being ill, I was worried how they would react towards me.
5. Wenn jemand mit mir über meine Erkrankung spricht, ist mir das unangenehm.  
5. It makes me feel uncomfortable if someone alludes to my illness
6. Ich wünschte, es hätten weniger Leute von meiner Erkrankung erfahren.  
6. I wish less people had known about my illness.
7. Ich habe das Gefühl, durch Institutionen (z.B. Gesundheitsamt, Arztpraxis, Rettungsdienst etc.) ungerecht oder nachteilig behandelt worden zu sein.  
7. I feel that I have been treated unfairly or adversely by institutions (health authority, family doctor, paramedics)



## S2) Interview guide

Alter / Geschlecht/ höchster Bildungsabschluss/ Schwere der COVID-19-Erkrankung  
Age/ Gender/ highest level of education/ severity of COVID-19

1. Was ging Ihnen durch den Kopf, als Sie erfuhren, dass der Test positiv ausgefallen war?
  1. What was going through your mind when you received the positive COVID-19 test result?
2. Wie hat sich ihr Leben verändert, seitdem Sie an COVID19 erkrankt waren?
  2. Did your life change since you had COVID-19? If yes, how did change?
3. Haben Sie jetzt noch gesundheitliche Beschwerden, auch wenn die Erkrankung als ausgeheilt gilt?
  3. Do you still have any symptoms, even if the infection is cured?
4. Wie haben Sie die Zeit in Quarantäne erlebt?
  4. How did you experience the time in quarantine?
    - a. Wie sah ein typischer Alltag in der Isolation aus?
      - a. How did your everyday routine in quarantine look like?
    - b. Was war besonders schwierig in dieser Zeit?
      - b. What was particularly difficult during that time?
5. Mit wem konnten Sie offen über Ihre Erkrankung sprechen?
  5. Who could you talk to about your condition?
6. Gab es Situationen, in denen Sie gezögert haben, offen über Ihre Erkrankung zu sprechen?
  6. Have you experienced a situation where you hesitated to talk freely about your infection?
7. Wie fielen die Reaktionen der Mitmenschen auf die Erkrankung aus?
  7. How did people react to your infection?
8. Haben Sie das Gefühl, dass andere Sie anders behandeln, als vor Ihrer Erkrankung?
  8. Do you have the feeling, that others treat you differently since you had COVID-19?
    - a. Inwiefern?
      - a. How so?

- 1  
2  
3           b. Beispiel?  
4  
5           b. Example?  
6  
7  
8           c. Wie sind sie damit umgegangen?  
9  
10          c. How did you cope with/ handle the situation?  
11  
12  
13 9. Gab es Reaktionen von Mitmenschen als diese von Ihrer Erkrankung gehört haben, die Sie  
14 überrascht haben? (positiv und negativ), und wenn ja, inwiefern?  
15  
16 9. Did you experience reactions of others when they heard about you having COVID-19 which  
17 surprised you, either in a good or in a bad way?  
18  
19  
20 10. Das Gesundheitsamt muss alle Kontaktpersonen informieren bzw. Sie mussten die  
21 Kontaktpersonen angeben – wie war das für Sie?  
22  
23 10. The health authority was obliged to inform every person you had been in contact with when  
24 you were diagnosed with COVID-19 – how did you feel about that?  
25  
26  
27  
28 11. Wie war das in der Arbeit, wie reagierten Kollegen auf Sie, als Sie zurückkamen?  
29  
30 11. At work, how did colleagues react when you came back?  
31  
32  
33 12. Es besteht immer das Risiko, unbewusst andere Personen anzustecken. Wie ging es Ihnen  
34 damit und wie sind Sie damit umgegangen?  
35  
36 12. There is always a risk to infect others, unknowingly. How did you feel about this and how did  
37 you cope with it?  
38  
39  
40  
41 13. Im Nachhinein ist man immer schlauer. Denken Sie manchmal, dass Sie hätten verhindern  
42 können, dass Sie sich angesteckt haben?  
43  
44 13. In hindsight, do you think you could have prevented catching COVID-19?  
45  
46  
47  
48 14. Angenommen ein guter Freund von Ihnen würde jetzt an COVID19 erkranken – wie würden  
49 Sie sich verhalten? (Vignette)  
50  
51 14. Assuming a close friend of yours would catch COVID-19, how would you react? (vignette)  
52  
53  
54 15. Hatten Sie aufgrund der Erkrankung finanzielle Sorgen?  
55  
56 15. Did you have financial problems because of having had COVID-19?  
57  
58  
59  
60

## S3) Experienced stigma by societal level

| Theme                       | Type of stigma                                | Code (n*)                           | Quotes                                                                                                                                                                                                                                                                                                                                                                                                                                                                                                                                                                                                                                                                                                                                                                                                                                                                                            |
|-----------------------------|-----------------------------------------------|-------------------------------------|---------------------------------------------------------------------------------------------------------------------------------------------------------------------------------------------------------------------------------------------------------------------------------------------------------------------------------------------------------------------------------------------------------------------------------------------------------------------------------------------------------------------------------------------------------------------------------------------------------------------------------------------------------------------------------------------------------------------------------------------------------------------------------------------------------------------------------------------------------------------------------------------------|
| <b>Individual level</b>     |                                               |                                     |                                                                                                                                                                                                                                                                                                                                                                                                                                                                                                                                                                                                                                                                                                                                                                                                                                                                                                   |
| <b>Vulnerability</b>        | -                                             | Fear, worries and despair (n = 11)  | <p>'I was thinking «why me?»... and «I hope this ends well...»' (female, 50-59 y/o)</p> <p>'I was thinking about death, about becoming even sicker and needing assisted ventilation... This was in the back of my head all the time. I really hope I don't catch it [SARS-CoV-2] again....' (female, 70-79 y/o)</p> <p>'It got worse and worse, I couldn't talk, I couldn't breathe.... I was on my own and...[stops speaking and starts to cry]' (female, 70-79 y/o)</p> <p>'When I woke up again, I knew I would survive.... but still, I was having these panic attacks' (male, 60-69 y/o)</p> <p>'I was afraid I could die. I saw it happen to other patients. It was frightening. The whole situation was frightening.' (male, 40-49 y/o)</p> <p>'You have this feeling that there is nothing to look forward to....' (male, 30-39 y/o)</p>                                                  |
|                             | <i>Internalised stigma / Perceived stigma</i> | Shame, guilt or remorse (n = 14)    | <p>'Of course you feel bad knowing you infected others' (female, 20-29 y/o)</p> <p>'I talked to the people who went into quarantine because of me to make sure they are okay' (male, 60-69 y/o)</p> <p>'I took the wrong decision to go there [place where he was infected]. I had this gut feeling that there is something wrong, that I shouldn't go there. But my friends told me to come with them.... I should have listened to my gut feeling.' (male, 50-59 y/o)</p> <p>'I really don't want to talk about it' (male, 50-59 y/o, sounding distressed), as response to the question, if he accidentally infected others.</p>                                                                                                                                                                                                                                                                |
|                             |                                               | Loneliness and abandonment (n = 14) | <p>'We all felt left alone. We didn't have any kind of support, neither by a doctor nor the public health authority. No one contacted us for days in a row and we started feeling afraid if all of that [referring to the COVID-19 symptoms] were still normal. Somehow, we felt left alone.' (female, 50-59 y/o)</p> <p>'People didn't want to have contact with me. This was especially hard for me, since I had been abroad before for two months, this really got to me.' (female, 20-29 y/o)</p> <p>'You feel that your social network isn't there, the ones you need most aren't with you.' (female 50-59 y/o)</p> <p>'Being on my own was the hardest part.' (male, 60-69 y/o)</p> <p>'You feel lonely. There was no one to talk to.' (female, 70-79 y/o)</p> <p>'You learn very quickly who stands by your side in these difficult times and who lets you down...'' (male, 50-59 y/o)</p> |
| <b>Financial insecurity</b> | -                                             | Direct costs (n = 2)                | <p>'That [not having COVID-19] would have saved me a great deal. Luckily, my health insurance covered most of the expenditures, but since my deductible is rather high, this disease caused a great financial loss for me.' (male, 50-59 y/o)</p> <p>'If I hadn't had any savings, it would have been problematic....' (male, 40-49 y/o)</p>                                                                                                                                                                                                                                                                                                                                                                                                                                                                                                                                                      |

|                                      |                                            |                                         |                                                                                                                                                                                                                                                                                                                                                                                                                                                                                                                                                                                                                                                                                                             |
|--------------------------------------|--------------------------------------------|-----------------------------------------|-------------------------------------------------------------------------------------------------------------------------------------------------------------------------------------------------------------------------------------------------------------------------------------------------------------------------------------------------------------------------------------------------------------------------------------------------------------------------------------------------------------------------------------------------------------------------------------------------------------------------------------------------------------------------------------------------------------|
|                                      |                                            | Loss of income / indirect costs (n = 1) | 'I have to earn my money with physical labour. When I can't work, I don't earn money...' (male, 50-59 y/o)                                                                                                                                                                                                                                                                                                                                                                                                                                                                                                                                                                                                  |
| <b>Interpersonal level</b>           |                                            |                                         |                                                                                                                                                                                                                                                                                                                                                                                                                                                                                                                                                                                                                                                                                                             |
| <b>Loss of autonomy</b>              | <i>Perceived stigma / (Enacted stigma)</i> | Loss of independence (n = 5)            | 'As we were all in quarantine, we relied on others to supply us with food' (female, 50-59 y/o)<br>'We were all isolated, other people had to take care of us.' (female, 20-29 y/o)                                                                                                                                                                                                                                                                                                                                                                                                                                                                                                                          |
|                                      |                                            | Violation of privacy (n = 4)            | 'When I was gone and they knew about it [COVID-19], they turned my whole workplace upside down' (male, 50-59 y/o)<br>'I live in a small village and within two hours, everyone knew about it [COVID-19]' (female, 20-29 y/o)                                                                                                                                                                                                                                                                                                                                                                                                                                                                                |
| <b>Vilification</b>                  |                                            | Blame (n = 9)                           | 'Some people said it is my own fault that I got infected.' (male, 50-59 y/o)<br>'They didn't talk bad in front of me.... but behind my back, I could sense that they thought it's my own fault' (male, 50-59 y/o)<br>'They [family members] were very angry with us that we didn't tell them about our infection. But we didn't know ourselves at that time and didn't have any symptoms! How should we know that we were ill?' (female, 50-59 y/o)<br>'She [a niece] was at our place before [we knew we had COVID-19] and it took a long time until she was able to get a test. She is still holding a grudge until today....' (female, 50-59 y/o)                                                        |
|                                      |                                            | Disregard (n = 4)                       | 'People didn't understand what I was going through. They said «it's like a flu», but for me, it didn't feel just like a flu. No one said «this sounds really bad»' (female, 50-59 y/o)<br>'They [acquaintances] did not really care about what had happened to me.' (female, 20-29 y/o)<br>'My sister said, as long as you don't need invasive ventilation, it's not that bad. But for me, just needing oxygen was already more than enough....' (female, 50-59 y/o)                                                                                                                                                                                                                                        |
| <b>Avoidance of personal contact</b> | <i>Enacted stigma</i>                      | (Irrational) fear of infection (n = 27) | 'In the beginning it felt like people were really scared of me.' (female, 20-29 y/o)<br>'Meeting people in person [in contrast to talking in the phone] was different. People become.... very careful' (male, 30-39 y/o).<br>'My aunt living next door kept her distance for weeks after my quarantine had ended, as if I were still contagious.' (female, 20-29 y/o)<br>'I noticed some people take a step back when I told them [about the COVID-19-infection]' (male, 50-59 y/o)<br>'Everyone you tell that you had COVID flinches and takes a step back' (male, 50-59 y/o)<br>'Many people withdrew from me for a long time.... I think they were still afraid of getting infected' (female, 70-79 y/o) |
|                                      |                                            | Other reasons (n = 2)                   | 'She distanced herself from me. I don't know why, she doesn't even believe in COVID.' (female, 50-59 y/o)                                                                                                                                                                                                                                                                                                                                                                                                                                                                                                                                                                                                   |
| <b>Community level</b>               |                                            |                                         |                                                                                                                                                                                                                                                                                                                                                                                                                                                                                                                                                                                                                                                                                                             |
| <b>Social rejection</b>              | <i>Enacted stigma</i>                      | (Irrational) fear of infection (n = 6)  | 'When I did my groceries and kept a 2 to 3 meters distance, people still told me to go further away.... they even changed the side of the street when they saw me.' (female, 20-29 y/o)<br>'When I went back to the office, some colleagues told me straight to the face they didn't like having me there. We are working in shifts and they would change shifts so they didn't have to work with me.' (male, 30-39 y/o)                                                                                                                                                                                                                                                                                    |

|                            |                               |                                                |                                                                                                                                                                                                                                                                                                                                                                                                                                                                                                                                                                                                                                                                                                                                                                                                                                                                                                                                                                                                                                                                                                                                                                                                                                                                                                                                                                                                                                                                                                                                                                                                                                                                                                                                                                                                                                                                                                         |
|----------------------------|-------------------------------|------------------------------------------------|---------------------------------------------------------------------------------------------------------------------------------------------------------------------------------------------------------------------------------------------------------------------------------------------------------------------------------------------------------------------------------------------------------------------------------------------------------------------------------------------------------------------------------------------------------------------------------------------------------------------------------------------------------------------------------------------------------------------------------------------------------------------------------------------------------------------------------------------------------------------------------------------------------------------------------------------------------------------------------------------------------------------------------------------------------------------------------------------------------------------------------------------------------------------------------------------------------------------------------------------------------------------------------------------------------------------------------------------------------------------------------------------------------------------------------------------------------------------------------------------------------------------------------------------------------------------------------------------------------------------------------------------------------------------------------------------------------------------------------------------------------------------------------------------------------------------------------------------------------------------------------------------------------|
|                            |                               |                                                | ‘When I went to the hairdresser, I told them I really needed a haircut since I had had COVID 3 months ago. First, they refused to cut my hair, they were afraid of getting infected.’ (male, 40-49 y/o)                                                                                                                                                                                                                                                                                                                                                                                                                                                                                                                                                                                                                                                                                                                                                                                                                                                                                                                                                                                                                                                                                                                                                                                                                                                                                                                                                                                                                                                                                                                                                                                                                                                                                                 |
| Stereotyping               | Perceived stigma              | Perceived recklessness or carelessness (n = 4) | ‘Now you [meaning the interviewer] are probably going to say «how on earth could you go skiing, and how could you go there [place where she got infected]?!?!», but back then it wasn’t that obvious...’ (female, 20-29 y/o)<br>‘People asked, why did go there, when it was a hotspot.’ (male, 50-59 y/o)<br>‘If a friend of mine had COVID, I would support him and say it’s not his fault that he got it. We didn’t choose for this either. I’d say it’s okay. I wouldn’t treat him any different and just act normal’ (female, 50-59 y/o)                                                                                                                                                                                                                                                                                                                                                                                                                                                                                                                                                                                                                                                                                                                                                                                                                                                                                                                                                                                                                                                                                                                                                                                                                                                                                                                                                           |
|                            |                               | Rumours (n = 2)                                | ‘In town, everyone acted like they knew better why I was infected’ (female, 20-29 y/o)                                                                                                                                                                                                                                                                                                                                                                                                                                                                                                                                                                                                                                                                                                                                                                                                                                                                                                                                                                                                                                                                                                                                                                                                                                                                                                                                                                                                                                                                                                                                                                                                                                                                                                                                                                                                                  |
| <b>Institutional level</b> |                               |                                                |                                                                                                                                                                                                                                                                                                                                                                                                                                                                                                                                                                                                                                                                                                                                                                                                                                                                                                                                                                                                                                                                                                                                                                                                                                                                                                                                                                                                                                                                                                                                                                                                                                                                                                                                                                                                                                                                                                         |
| Indirect discrimination    | Structural and enacted stigma | Lack of accountability (n = 10)                | ‘They [health authorities] gave us a number where we could call, but no one ever answered the phone.’ (female, 20-29 y/o)<br>‘When I should be discharged from the hospital, and I was still contagious, they [the hospital staff] told me there was no transport to get me home, of course I wasn’t allowed to use the public transport and a family member should pick me up. But they were all in quarantine. I tried to contact the public health authority all day long to get a permission for my mother to pick me up, that was very distressing for me. Then they [the hospital staff] came all of the sudden and said I had to go now.’ (female, 20-29 y/o).<br>‘After we knew we had been in a hotspot, we tried to get a test. When finally someone answered the phone, they told us we couldn’t get a test since the place wasn’t officially declared a hotspot yet.’ (female, 20-29 y/o)<br>‘Even when I felt bad, it was impossible to find a doctor to talk to... so in the end I called 112 [national emergency number]’ (female, 50-59 y/o)<br>‘The worst thing was to get to the hospital in the first place.... So I dialled that number, but ended up in an endless waiting loop. In the other clinic it was exactly the same. I called my general practitioner; he wrote me a sick note for a week. But I didn’t need that, I told him I need help... but all he did was writing a second sick note for another week.... Either you are rejected right away or you end up in an endless waiting loop on the phone.’ (male, 50-59 y/o)<br>‘When I came back home [from a hotspot] my friend who was with me tested positive. The health authority didn’t contact me for days. Then I called them, and they said they were not responsible, another authority is responsible for my case. So I called them, but they said, the first authority was responsible....’ (male 50-59 y/o) |
|                            |                               | Inconsistency (n = 4)                          | ‘First, they [public health authority] sent us to a testing centre because we had been to an endemic area. But later they were upset that we went there, since we were supposed to stay at home in quarantine....’ (female, 20-29 y/o)<br>‘First they told me I have to stay in quarantine for another 2 weeks after I was discharged from the hospital. On the last day of my quarantine, my son got a letter that he needs to stay in quarantine for another 2 weeks, in case he got infected on my last day in quarantine. But my wife and daughter didn’t have to stay in quarantine any longer, but we were all members of the same household. That didn’t make any sense.’ (male, 50-59 y/o)<br>‘They [the health authority] told me on the phone my quarantine ended on Thursday. Then I got the letter from them saying I needed to stay in quarantine for another 2 weeks’ (male, 50-59 y/o)                                                                                                                                                                                                                                                                                                                                                                                                                                                                                                                                                                                                                                                                                                                                                                                                                                                                                                                                                                                                   |

|                           |                                                     |                                             |                                                                                                                                                                                                                                                                                                                                                                                                                                                                                                                                                                                                                                                                                                                                                                                                                                                                                                                                                                                                                                                                  |
|---------------------------|-----------------------------------------------------|---------------------------------------------|------------------------------------------------------------------------------------------------------------------------------------------------------------------------------------------------------------------------------------------------------------------------------------------------------------------------------------------------------------------------------------------------------------------------------------------------------------------------------------------------------------------------------------------------------------------------------------------------------------------------------------------------------------------------------------------------------------------------------------------------------------------------------------------------------------------------------------------------------------------------------------------------------------------------------------------------------------------------------------------------------------------------------------------------------------------|
| Direct discrimination     |                                                     | Unprofessional treatment (n = 4)            | <p>'Since I was the second patient in that other hospital, they had a lot of «respect» of me and avoided coming close to me... that was even worse for me than the [rejecting] behaviour of other people.' (female, 20-29 y/o)</p> <p>'After I was discharged from the hospital, I wanted to go to the general practitioner for a prescription but they told me I wasn't allowed there, even though I wasn't in quarantine anymore. Then 12 weeks later, I needed a letter of transferral, but even then, my sister had to get it for me...' (male, 60-69 y/o)</p> <p>'When he [a friend] stayed at home because one of our group tested positive, his boss counted that as vacation, because the health authority hadn't called yet.' (male 50-59 y/o)</p> <p>'I was feeling so bad, but in that other hospital they [staff] told me to leave immediately, they threw me out.... so I was crying in front of the hospital until my daughter came to get me. A few days later, I collapsed, and I was brought in here and needed oxygen' (female, 70-79 y/o)</p> |
| <b>Societal level</b>     |                                                     |                                             |                                                                                                                                                                                                                                                                                                                                                                                                                                                                                                                                                                                                                                                                                                                                                                                                                                                                                                                                                                                                                                                                  |
| Societal norms and values | <i>Perceived and internalized values and stigma</i> | COVID-19 as non-desirable condition (n = 5) | <p>'When I got the positive test, I was utterly shocked' (female, 20-29 y/o)</p> <p>'I was surprised. I never thought we would get it.' (female, 50-59 y/o)</p> <p>'I was just feeling ill and coughing. Maybe it wasn't COVID after all. They [the doctors] said the CT-scan confirmed it, but my test was negative.' (male, 50-59 y/o, denying he had COVID-19)</p>                                                                                                                                                                                                                                                                                                                                                                                                                                                                                                                                                                                                                                                                                            |
|                           |                                                     | Perceived menace to others (n = 10)         | <p>'I didn't want to bother people. Maybe they would have thought I am still contagious.' (female, 70-79 y/o)**</p> <p>'None of my family members got ill, I didn't infect anyone.' (male, 30-39 y/o)**</p> <p>'We all paid a lot of attention. We didn't infect others.' (male 50-59 y/o)**</p> <p>Q: 'Do you happen to know if you accidentally infected somebody?' A: 'I don't want to talk about that.' (male, 50-59 y/o)</p>                                                                                                                                                                                                                                                                                                                                                                                                                                                                                                                                                                                                                                |

\* n = the number how many times this code was applied throughout the interviews

\*\* The assurance of not having infected others reflects the perceived stigma as menace to others and the public health on one hand and efforts to contain the disease as coping with this perception on the other hand.

## S4) Applied coping strategies by societal level

| Theme                                  | Code (n*)                  | Quotes                                                                                                                                                                                                                                                                                                                                                                                                                                                                       |
|----------------------------------------|----------------------------|------------------------------------------------------------------------------------------------------------------------------------------------------------------------------------------------------------------------------------------------------------------------------------------------------------------------------------------------------------------------------------------------------------------------------------------------------------------------------|
| <b>Individual level</b>                |                            |                                                                                                                                                                                                                                                                                                                                                                                                                                                                              |
| <b>Resilience</b>                      | Confidence (n = 5)         | 'I knew I was getting medication; I was sure that would help, otherwise they wouldn't give them to me. I wasn't worried I would die.' (male, 60-69 y/o)<br>'I felt in good hands.' (male, 50-59 y/o)<br>'None of us felt that sick that we needed to go to the hospital.' (female, 50-59 y/o)                                                                                                                                                                                |
|                                        | Self-efficacy (n = 2)      | 'In the beginning it was very hard for me. But as soon as I managed to structure my day, time just flew by.' (male, 30-39 y/o)                                                                                                                                                                                                                                                                                                                                               |
| <b>Coming to terms</b>                 | Pragmatism (n = 2)         | 'I had it [COVID-19], that's all there is. Now I am cured and immune.' (female, 70-79 y/o)                                                                                                                                                                                                                                                                                                                                                                                   |
|                                        | Delayed disclosure (n = 3) | 'Back then, I told them [friends and family] I had it [COVID-19]. But I didn't tell them any details. Now I would, but back then, I just didn't want to.' (male, 40-49 y/o)<br>'In the beginning, I didn't want to share with anyone. Afterwards, we talked about it.' (female, 70-79 y/o)<br>'I would not go around and tell everyone deliberately that I had it [COVID-19]. But now it is over, if anyone asked, I would answer honestly that I had it.' (male, 30-39 y/o) |
|                                        | Rationalisation (n = 2)    | 'We checked the incidence before we went, and it looked fine, so we didn't see any danger in going there [to a hotspot]' (female, 20-29 y/o)<br>'When I was there, it wasn't known to be a hotspot' (male, 50-59 y/o)                                                                                                                                                                                                                                                        |
|                                        | Denial or fallacy (n = 1)  | 'Maybe I didn't have it [COVID-19]. I even know couples, where one had it and the other didn't' (male, 50-59 y/o)                                                                                                                                                                                                                                                                                                                                                            |
| <b>Financial security</b>              | Financial security (n = 8) | 'I didn't face any financial problems, my salary just continued.' (male, 40-49 y/o)<br>'I was on sick leave and got my loan as usual.' (female, 20-29 y/o)<br>'I am retired, so I didn't have any financial problems.' (female, 70-79 y/o)                                                                                                                                                                                                                                   |
| <b>Interpersonal level</b>             |                            |                                                                                                                                                                                                                                                                                                                                                                                                                                                                              |
| <b>Reaction to rejective behaviour</b> | Understanding (n = 10)     | 'I could totally understand their [friends] behaviour. No one knew exactly how long people can transmit COVID' (female, 20-29 y/o)<br>'I could understand that, I didn't blame anyone.' (female 70-79 y/o)                                                                                                                                                                                                                                                                   |
|                                        | Reasoning (n = 2)          | 'I tried to explain, I argued with them [family members].... but with some people, you just can't reason at all.' (female, 50-59 y/o)<br>'When they [friends] took a step back, I told them there was no reason, they could hug me, I am no longer contagious.' (male 50-59 y/o)                                                                                                                                                                                             |
|                                        | Distancing (n = 2)         | 'When heard about what others said, I just distanced myself from that.' (male, 50-59 y/o)                                                                                                                                                                                                                                                                                                                                                                                    |



|                                 |                                              |                                                                                                                                                                                                                                                                                                                                                                                                                                                                                                                                                                                                                                   |
|---------------------------------|----------------------------------------------|-----------------------------------------------------------------------------------------------------------------------------------------------------------------------------------------------------------------------------------------------------------------------------------------------------------------------------------------------------------------------------------------------------------------------------------------------------------------------------------------------------------------------------------------------------------------------------------------------------------------------------------|
| Personal contact                | Genuine interest and mindfulness (n = 7)     | <p>'In a way, we were lucky, that the whole family was in quarantine, so we had each other' (female, 20-29 y/o)</p> <p>'It is very important, that there are people who care about you and want to know how you are doing. My mum called every day to check on me, that felt good.' (male, 30-39 y/o)</p> <p>'I would call and make sure he [friend from vignette] is okay. I would tell him, everything is going to be fine, since he is young.' (female, 20-29 y/o)</p> <p>'Some people just want to know more about it from people who had it [COVID-19] and are very interested in what I experienced.' (male, 30-39 y/o)</p> |
|                                 | Unaltered interpersonal relationship (n = 4) | <p>'With my friends, it is same way as it has been before. No distance, not too many questions.' (male, 30-39 y/o)</p> <p>'I infected my boyfriend, but he remained relaxed.' (female, 20-29 y/o)</p> <p>'When I came home from the hospital, everyone was just so happy to see me, that was very touching.' (male, 50-59 y/o)</p>                                                                                                                                                                                                                                                                                                |
|                                 | Comprehension (n = 4)                        | <p>'I talked to a friend in a similar situation, and she could totally relate.' (female, 20-29 y/o)</p> <p>'People told me it's a miracle I got through all of this without serious psychological damage. When we talked about it, it became clear, that others were frightened of being alone in such a situation as well' (female, 70-79 y/o)</p> <p>'If a friend of mine had COVID, I would support him and say it's not his fault that he got it. We didn't choose for this either.' (female, 50-59 y/o)</p>                                                                                                                  |
| <b>Community level</b>          |                                              |                                                                                                                                                                                                                                                                                                                                                                                                                                                                                                                                                                                                                                   |
| Reaction to rejective behaviour | Resignation (n = 3)                          | <p>'I can live with it [people avoiding him]. I take it with humour.' (male, 50-59 y/o)</p> <p>'I didn't really bother. Couldn't change it anyway. (...) You have to take it the way it is.' (male, 40-49 y/o)</p>                                                                                                                                                                                                                                                                                                                                                                                                                |
|                                 | Understanding (n = 3)                        | <p>'That was a new situation, people probably didn't know better.' (female, 20-29 y/o)</p> <p>'I tried to understand their reaction [people at work] and asked myself, how I would have reacted. And honestly, I would keep my distance too. That is probably human.' (male, 30-39 y/o)</p>                                                                                                                                                                                                                                                                                                                                       |
|                                 | Reasoning (n = 2)                            | <p>'I told them [people in a grocery store] I am no longer contagious and that they don't need to keep a 10-meter distance. In fact, I am less dangerous than other people.' (female, 20-29 y/o)</p>                                                                                                                                                                                                                                                                                                                                                                                                                              |
| Social network and inclusion    | Sympathy (n = 7)                             | <p>'So many people called during my absence to make sure I am okay, and they were so happy to hear from me when I called them back.' (male, 60-69 y/o)</p> <p>'I received so much sympathy, from friends and relatives, but also from the whole community, where I am active in different associations. They all felt for me and asked «Hey, how are doing?». I got a lot of positive signals. They just wanted me to recover soon.' (male, 60-69 y/o)</p>                                                                                                                                                                        |
|                                 | Solidarity and support (n = 7)               | <p>'From time to time, a neighbour would leave something for me at my door.' (female, 20-29 y/o)</p> <p>'Many people from our village offered help and asked if they could get us anything. I was surprised by their willingness to help.' (female, 50-59 y/o)</p> <p>'Some neighbours made food and left it at the door for us. They really cared about us' (male, 50-59 y/o)</p>                                                                                                                                                                                                                                                |
| <b>Institutional level</b>      |                                              |                                                                                                                                                                                                                                                                                                                                                                                                                                                                                                                                                                                                                                   |
| Reaction to discrimination      | Leniency (n = 8)                             | <p>'I guess they [the health authorities] were just overwhelmed' (male, 50-59 y/o)</p> <p>'I hope by now, it is more organised' (female, 50-59 y/o)</p> <p>'Those people refusing the regulations don't carry the responsibility. Everyone with that kind of responsibility supports a lockdown.' (male, 50-59 y/o)</p>                                                                                                                                                                                                                                                                                                           |

|                         |                                             |                                                                                                                                                                                                                                                                                                                                                                                                                                                                                                                                                                                                                                                             |
|-------------------------|---------------------------------------------|-------------------------------------------------------------------------------------------------------------------------------------------------------------------------------------------------------------------------------------------------------------------------------------------------------------------------------------------------------------------------------------------------------------------------------------------------------------------------------------------------------------------------------------------------------------------------------------------------------------------------------------------------------------|
|                         | Incomprehension (n = 8)                     | 'I was feeling sick and I couldn't get through [by telephone] to any doctor or health authority for days to get a test. That really bothered me.' (female, 20-29 y/o)<br>'I really felt mocked by the health authorities.' (female, 20-29 y/o)<br>'For me, it was extremely hard. (...) That is why I didn't tell the health authority I also had contact with my parents. I didn't want to do this to them' (male, 30-39 y/o)                                                                                                                                                                                                                              |
| <b>Received support</b> | Appreciation of health-care workers (n = 4) | 'He [family doctor] called every day to make sure I was okay. That felt good.' (female, 70-79 y/o)<br>'I remember a doctor who was looking for possible treatment options all day long and called another university hospital. In the end, the treatment saved me' (male, 50-59 y/o)<br>'The hospital staff was very caring and always very kind' (male, 60-69 y/o)                                                                                                                                                                                                                                                                                         |
|                         | Support group (n = 2)                       | 'Is there a self-help group for COVID survivors?' (male, 50-59 y/o)                                                                                                                                                                                                                                                                                                                                                                                                                                                                                                                                                                                         |
| <b>Societal level</b>   |                                             |                                                                                                                                                                                                                                                                                                                                                                                                                                                                                                                                                                                                                                                             |
| <b>Harm reduction</b>   | Law-abiding (n=5)                           | 'I kept my distance, I stuck to the rules, I didn't infect anyone.' (female, 70-79 y/o)**<br>'When we came back [from a hotspot] we stayed at home. So when we finally knew we had it [COVID-19], at least I didn't feel guilty, because I knew I didn't infect anyone else.' (female, 20-29 y/o)<br>'I was scared to infect anyone. We barely had contact, I wore a mask when I went to the bathroom, I did my laundry separately, just like the health authority told me to. In the end, none of my family members got ill, I didn't infect anyone.' (male, 30-39 y/o)**<br>'We all paid a lot of attention. We didn't infect others.' (male 50-59 y/o)** |
|                         | Social withdrawal (n = 3)                   | 'I didn't want to bother people. Maybe they would have thought I am still contagious.' (female, 70-79 y/o)<br>'When my quarantine ended, I didn't ask people to meet. I was afraid they would react.... in a strange way.' (female, 20-29 y/o)<br>'I am only on contact with my closes relatives.' (male, 50-59 y/o)                                                                                                                                                                                                                                                                                                                                        |
|                         | Hygiene advocacy (n = 3)                    | 'I tell everyone, they should wear their face masks.' (female, 70-79 y/o)<br>'No matter where we go, with all our friends, we have this discussion [about the need for regulations and hygiene practices], it is the only way. When people say «It is only a flu.», I tell them, it is not. It is a whole different affair.' (male 60-69 y/o)                                                                                                                                                                                                                                                                                                               |

\* n = the number how many times this code was applied throughout the interviews

\*\* The assurance of not having infected others reflects the perceived stigma as menace to others and the public health on one hand and efforts to contain the disease as coping with this perception on the other hand.

1  
2  
3  
4  
5  
6  
7  
8  
9  
10  
11  
12  
13  
14  
15  
16  
17  
18  
19  
20  
21  
22  
23  
24  
25  
26  
27  
28  
29  
30  
31  
32  
33  
34  
35  
36  
37  
38  
39  
40  
41  
42  
43  
44  
45  
46

|                                                                                                       |                                           |                                                                                                                                                                                                                                                                                                                                                                                 |
|-------------------------------------------------------------------------------------------------------|-------------------------------------------|---------------------------------------------------------------------------------------------------------------------------------------------------------------------------------------------------------------------------------------------------------------------------------------------------------------------------------------------------------------------------------|
| <b>Perception of legal stipulations</b><br><br>(measures of containment, mandatory face mask, curfew) | Support (n = 5)                           | 'I tell everyone, they should wear their face masks, if they got it [COVID-19], it's to late.' (female, 73 y/o)<br>'I wish people would pull themselves together. (...) If you are unlucky, you are gone.' (male, 69 y/o)                                                                                                                                                       |
|                                                                                                       | Acceptance (in spite of struggle) (n = 6) | 'I longed to go out for a walk....but I stayed inside' (female, 25 y/o)<br>'We were all cramped together. After some time, it is normal you go on each other's nerve.... Then you need to withdraw to have your own space' (female 23 y/o)                                                                                                                                      |
|                                                                                                       | Confusion (n = 6)                         | 'I think the whole topic is very confusing, I am missing a clear line. The regulations are different in different places, that confuses people.' (female, 51 y/o)<br>'Sometimes, the regulations seem a bit random.' (male, 38 y/o)<br>'Of course we need certain restrictions, but sometimes it feels like those in charge didn't really think that through.' (female, 25 y/o) |
|                                                                                                       | Doubt and refuse (n = 3)                  | 'For me, it was extremely hard. (...) That is why I didn't tell the health authority I also had contact with my parents. I didn't want to do this to them' (male, 38 y/o)<br>'I am not sure, if wearing these masks is really the solution for this problem.' (male, 53 y/o)<br>'I am not supporting these masks.... It is hard to breathe.' (male 55 y/o)                      |
|                                                                                                       | Hope (n = 2)                              | 'Maybe we can all go back to normal soon.' (male, 38 y/o)                                                                                                                                                                                                                                                                                                                       |

## Standards for Reporting Qualitative Research (SRQR)\*

<http://www.equator-network.org/reporting-guidelines/srqr/>

Page/line no(s).

### Title and abstract

|                                                                                                                                                                                                                                                              |     |
|--------------------------------------------------------------------------------------------------------------------------------------------------------------------------------------------------------------------------------------------------------------|-----|
| <p><b>Title</b> - Concise description of the nature and topic of the study Identifying the study as qualitative or indicating the approach (e.g., ethnography, grounded theory) or data collection methods (e.g., interview, focus group) is recommended</p> | p 1 |
| <p><b>Abstract</b> - Summary of key elements of the study using the abstract format of the intended publication; typically includes background, purpose, methods, results, and conclusions</p>                                                               | p 1 |

### Introduction

|                                                                                                                                                                     |    |
|---------------------------------------------------------------------------------------------------------------------------------------------------------------------|----|
| <p><b>Problem formulation</b> - Description and significance of the problem/phenomenon studied; review of relevant theory and empirical work; problem statement</p> | p2 |
| <p><b>Purpose or research question</b> - Purpose of the study and specific objectives or questions</p>                                                              | p2 |

### Methods

|                                                                                                                                                                                                                                                                                                                                                                                                             |      |
|-------------------------------------------------------------------------------------------------------------------------------------------------------------------------------------------------------------------------------------------------------------------------------------------------------------------------------------------------------------------------------------------------------------|------|
| <p><b>Qualitative approach and research paradigm</b> - Qualitative approach (e.g., ethnography, grounded theory, case study, phenomenology, narrative research) and guiding theory if appropriate; identifying the research paradigm (e.g., postpositivist, constructivist/ interpretivist) is also recommended; rationale**</p>                                                                            | p4   |
| <p><b>Researcher characteristics and reflexivity</b> - Researchers' characteristics that may influence the research, including personal attributes, qualifications/experience, relationship with participants, assumptions, and/or presuppositions; potential or actual interaction between researchers' characteristics and the research questions, approach, methods, results, and/or transferability</p> | p14  |
| <p><b>Context</b> - Setting/site and salient contextual factors; rationale**</p>                                                                                                                                                                                                                                                                                                                            |      |
| <p><b>Sampling strategy</b> - How and why research participants, documents, or events were selected; criteria for deciding when no further sampling was necessary (e.g., sampling saturation); rationale**</p>                                                                                                                                                                                              | p4   |
| <p><b>Ethical issues pertaining to human subjects</b> - Documentation of approval by an appropriate ethics review board and participant consent, or explanation for lack thereof; other confidentiality and data security issues</p>                                                                                                                                                                        | p4   |
| <p><b>Data collection methods</b> - Types of data collected; details of data collection procedures including (as appropriate) start and stop dates of data collection and analysis, iterative process, triangulation of sources/methods, and modification of procedures in response to evolving study findings; rationale**</p>                                                                             | p4-5 |

|                       |                                                                                                                                                                                                                                                       |                  |
|-----------------------|-------------------------------------------------------------------------------------------------------------------------------------------------------------------------------------------------------------------------------------------------------|------------------|
| 1<br>2<br>3<br>4<br>5 | <b>Data collection instruments and technologies</b> - Description of instruments (e.g., interview guides, questionnaires) and devices (e.g., audio recorders) used for data collection; if/how the instrument(s) changed over the course of the study | p4 (S2)          |
| 6<br>7<br>8           | <b>Units of study</b> - Number and relevant characteristics of participants, documents, or events included in the study; level of participation (could be reported in results)                                                                        | p4-5 and table 1 |
| 9<br>10<br>11<br>12   | <b>Data processing</b> - Methods for processing data prior to and during analysis, including transcription, data entry, data management and security, verification of data integrity, data coding, and anonymization/de-identification of excerpts    | p4-5             |
| 13<br>14<br>15<br>16  | <b>Data analysis</b> - Process by which inferences, themes, etc., were identified and developed, including the researchers involved in data analysis; usually references a specific paradigm or approach; rationale**                                 | p5               |
| 17<br>18<br>19<br>20  | <b>Techniques to enhance trustworthiness</b> - Techniques to enhance trustworthiness and credibility of data analysis (e.g., member checking, audit trail, triangulation); rationale**                                                                | p5               |

### Results/findings

|                            |                                                                                                                                                                                                   |                                              |
|----------------------------|---------------------------------------------------------------------------------------------------------------------------------------------------------------------------------------------------|----------------------------------------------|
| 23<br>24<br>25<br>26       | <b>Synthesis and interpretation</b> - Main findings (e.g., interpretations, inferences, and themes); might include development of a theory or model, or integration with prior research or theory | p7-11 (and figure 3 as model)                |
| 27<br>28<br>29<br>30<br>31 | <b>Links to empirical data</b> - Evidence (e.g., quotes, field notes, text excerpts, photographs) to substantiate analytic findings                                                               | p7-p11 (and more quotes and notes in S3, S4) |

### Discussion

|                                        |                                                                                                                                                                                                                                                                                                                                                                                                             |        |
|----------------------------------------|-------------------------------------------------------------------------------------------------------------------------------------------------------------------------------------------------------------------------------------------------------------------------------------------------------------------------------------------------------------------------------------------------------------|--------|
| 34<br>35<br>36<br>37<br>38<br>39<br>40 | <b>Integration with prior work, implications, transferability, and contribution(s) to the field</b> - Short summary of main findings; explanation of how findings and conclusions connect to, support, elaborate on, or challenge conclusions of earlier scholarship; discussion of scope of application/generalizability; identification of unique contribution(s) to scholarship in a discipline or field | p12-14 |
| 41                                     | <b>Limitations</b> - Trustworthiness and limitations of findings                                                                                                                                                                                                                                                                                                                                            | p14    |

### Other

|                |                                                                                                                                               |     |
|----------------|-----------------------------------------------------------------------------------------------------------------------------------------------|-----|
| 44<br>45<br>46 | <b>Conflicts of interest</b> - Potential sources of influence or perceived influence on study conduct and conclusions; how these were managed | p15 |
| 47<br>48       | <b>Funding</b> - Sources of funding and other support; role of funders in data collection, interpretation, and reporting                      | p15 |

\*The authors created the SRQR by searching the literature to identify guidelines, reporting standards, and critical appraisal criteria for qualitative research; reviewing the reference lists of retrieved sources; and contacting experts to gain feedback. The SRQR aims to improve the transparency of all aspects of qualitative research by providing clear standards for reporting qualitative research.

1  
2  
3  
4  
5  
6  
7  
8  
9  
10  
11  
12  
13  
14  
15  
16  
17  
18  
19  
20  
21  
22  
23  
24  
25  
26  
27  
28  
29  
30  
31  
32  
33  
34  
35  
36  
37  
38  
39  
40  
41  
42  
43  
44  
45  
46  
47  
48  
49  
50  
51  
52  
53  
54  
55  
56  
57  
58  
59  
60

\*\*The rationale should briefly discuss the justification for choosing that theory, approach, method, or technique rather than other options available, the assumptions and limitations implicit in those choices, and how those choices influence study conclusions and transferability. As appropriate, the rationale for several items might be discussed together.

**Reference:**

O'Brien BC, Harris IB, Beckman TJ, Reed DA, Cook DA. **Standards for reporting qualitative research: a synthesis of recommendations.** *Academic Medicine*, Vol. 89, No. 9 / Sept 2014  
DOI: 10.1097/ACM.0000000000000388

For peer review only

## STROBE Statement—checklist of items that should be included in reports of observational studies

|                              | Item No | Recommendation                                                                                                                                                                                                                                                                                                                                                                                                                                                         | Page No |
|------------------------------|---------|------------------------------------------------------------------------------------------------------------------------------------------------------------------------------------------------------------------------------------------------------------------------------------------------------------------------------------------------------------------------------------------------------------------------------------------------------------------------|---------|
| <b>Title and abstract</b>    | 1       | (a) Indicate the study's design with a commonly used term in the title or the abstract                                                                                                                                                                                                                                                                                                                                                                                 | 1 and 2 |
|                              |         | (b) Provide in the abstract an informative and balanced summary of what was done and what was found                                                                                                                                                                                                                                                                                                                                                                    | 2       |
| <b>Introduction</b>          |         |                                                                                                                                                                                                                                                                                                                                                                                                                                                                        |         |
| Background/rationale         | 2       | Explain the scientific background and rationale for the investigation being reported                                                                                                                                                                                                                                                                                                                                                                                   | 4       |
| Objectives                   | 3       | State specific objectives, including any prespecified hypotheses                                                                                                                                                                                                                                                                                                                                                                                                       | 4       |
| <b>Methods</b>               |         |                                                                                                                                                                                                                                                                                                                                                                                                                                                                        |         |
| Study design                 | 4       | Present key elements of study design early in the paper                                                                                                                                                                                                                                                                                                                                                                                                                | 5       |
| Setting                      | 5       | Describe the setting, locations, and relevant dates, including periods of recruitment, exposure, follow-up, and data collection                                                                                                                                                                                                                                                                                                                                        | 5       |
| Participants                 | 6       | (a) <i>Cohort study</i> —Give the eligibility criteria, and the sources and methods of selection of participants. Describe methods of follow-up<br><i>Case-control study</i> —Give the eligibility criteria, and the sources and methods of case ascertainment and control selection. Give the rationale for the choice of cases and controls<br><i>Cross-sectional study</i> —Give the eligibility criteria, and the sources and methods of selection of participants | 5       |
|                              |         | (b) <i>Cohort study</i> —For matched studies, give matching criteria and number of exposed and unexposed<br><i>Case-control study</i> —For matched studies, give matching criteria and the number of controls per case                                                                                                                                                                                                                                                 |         |
| Variables                    | 7       | Clearly define all outcomes, exposures, predictors, potential confounders, and effect modifiers. Give diagnostic criteria, if applicable                                                                                                                                                                                                                                                                                                                               | 5       |
| Data sources/<br>measurement | 8*      | For each variable of interest, give sources of data and details of methods of assessment (measurement). Describe comparability of assessment methods if there is more than one group                                                                                                                                                                                                                                                                                   | 5       |
| Bias                         | 9       | Describe any efforts to address potential sources of bias                                                                                                                                                                                                                                                                                                                                                                                                              | 5       |
| Study size                   | 10      | Explain how the study size was arrived at                                                                                                                                                                                                                                                                                                                                                                                                                              | 5       |
| Quantitative variables       | 11      | Explain how quantitative variables were handled in the analyses. If applicable, describe which groupings were chosen and why                                                                                                                                                                                                                                                                                                                                           | 5       |
| Statistical methods          | 12      | (a) Describe all statistical methods, including those used to control for confounding                                                                                                                                                                                                                                                                                                                                                                                  | 5       |
|                              |         | (b) Describe any methods used to examine subgroups and interactions                                                                                                                                                                                                                                                                                                                                                                                                    | 5       |
|                              |         | (c) Explain how missing data were addressed                                                                                                                                                                                                                                                                                                                                                                                                                            | 5       |
|                              |         | (d) <i>Cohort study</i> —If applicable, explain how loss to follow-up was addressed<br><i>Case-control study</i> —If applicable, explain how matching of cases and controls was addressed<br><i>Cross-sectional study</i> —If applicable, describe analytical methods taking account of sampling strategy                                                                                                                                                              | 5       |
|                              |         | (e) Describe any sensitivity analyses                                                                                                                                                                                                                                                                                                                                                                                                                                  | 5       |

Continued on next page



| <b>Results</b>           |     |                                                                                                                                                                                                              |       |
|--------------------------|-----|--------------------------------------------------------------------------------------------------------------------------------------------------------------------------------------------------------------|-------|
| Participants             | 13* | (a) Report numbers of individuals at each stage of study—eg numbers potentially eligible, examined for eligibility, confirmed eligible, included in the study, completing follow-up, and analysed            | 7     |
|                          |     | (b) Give reasons for non-participation at each stage                                                                                                                                                         | (7)   |
|                          |     | (c) Consider use of a flow diagram                                                                                                                                                                           | n.a.  |
| Descriptive data         | 14* | (a) Give characteristics of study participants (eg demographic, clinical, social) and information on exposures and potential confounders                                                                     | 5     |
|                          |     | (b) Indicate number of participants with missing data for each variable of interest                                                                                                                          | (7)   |
|                          |     | (c) <i>Cohort study</i> —Summarise follow-up time (eg, average and total amount)                                                                                                                             | n.a.  |
| Outcome data             | 15* | <i>Cohort study</i> —Report numbers of outcome events or summary measures over time                                                                                                                          | n.a.  |
|                          |     | <i>Case-control study</i> —Report numbers in each exposure category, or summary measures of exposure                                                                                                         | n.a.  |
|                          |     | <i>Cross-sectional study</i> —Report numbers of outcome events or summary measures                                                                                                                           | 7     |
| Main results             | 16  | (a) Give unadjusted estimates and, if applicable, confounder-adjusted estimates and their precision (eg, 95% confidence interval). Make clear which confounders were adjusted for and why they were included | 7     |
|                          |     | (b) Report category boundaries when continuous variables were categorized                                                                                                                                    | n.a.  |
|                          |     | (c) If relevant, consider translating estimates of relative risk into absolute risk for a meaningful time period                                                                                             | n.a.  |
| Other analyses           | 17  | Report other analyses done—eg analyses of subgroups and interactions, and sensitivity analyses                                                                                                               | 8     |
| <b>Discussion</b>        |     |                                                                                                                                                                                                              |       |
| Key results              | 18  | Summarise key results with reference to study objectives                                                                                                                                                     | 13    |
| Limitations              | 19  | Discuss limitations of the study, taking into account sources of potential bias or imprecision. Discuss both direction and magnitude of any potential bias                                                   | 15    |
| Interpretation           | 20  | Give a cautious overall interpretation of results considering objectives, limitations, multiplicity of analyses, results from similar studies, and other relevant evidence                                   | 13/14 |
| Generalisability         | 21  | Discuss the generalisability (external validity) of the study results                                                                                                                                        | 14    |
| <b>Other information</b> |     |                                                                                                                                                                                                              |       |
| Funding                  | 22  | Give the source of funding and the role of the funders for the present study and, if applicable, for the original study on which the present article is based                                                | 1     |

\*Give information separately for cases and controls in case-control studies and, if applicable, for exposed and unexposed groups in cohort and cross-sectional studies.

**Note:** An Explanation and Elaboration article discusses each checklist item and gives methodological background and published examples of transparent reporting. The STROBE checklist is best used in conjunction with this article (freely available on the Web sites of PLoS Medicine at <http://www.plosmedicine.org/>, Annals of Internal Medicine at <http://www.annals.org/>, and Epidemiology at <http://www.epidem.com/>). Information on the STROBE Initiative is available at [www.strobe-statement.org](http://www.strobe-statement.org).
